# Supplementary material
Source: PubMed Central journal article supplement (PMC3719515)
Supplement: AEM.00821-13_zam999104563so1.pdf [file AEM.00821-13_zam999104563so1.pdf]

1 Supplementary Materials for:

2 **Genome of the anaerobic gut fungal strain *Orpinomyces* sp. C1A reveals the unique**  
3 **evolutionary history of a remarkable plant biomass degrader**

4

5 Noha H. Youssef, MB Couger, Christopher G. Struchtemeyer, Audra S. Ligginstoffer,  
6 Rolf A. Prade, Fares Z. Najjar, Hasan K. Atiyeh, Mark R. Wilkins, and Mostafa S.  
7 Elshahed

8

9

10

11

1 **Table of contents**

2 **I. Results.**

3 1. Metabolism in strain C1A.....4  
4 2. Genetic information processing in strain C1A .....8  
5 3. Salient differences between the C1A genome and those of and Dikarya Fungi.....10  
6 3.1. Intra-membrane proteases.  
7 3.2. Post-translational protein modification.  
8 3.3. Focal adhesion.  
9 3.4. Axoneme.  
10 3.5. Protease inhibitors.  
11 4. Hydrogenosomal structure and function in strain C1A.....15  
12 4.1. Protein import system.  
13 4.2. Identification of hydrogenosomal-bound proteins.  
14 4.3. Hydrogenosomal FeS cluster assembly.  
15 4.4. Fermentation, pyruvate metabolism, and electron carriers recycling in the  
16 hydrogenosome.  
17 5. Transporters in the C1A genome.....16  
18 6. Peptidases in the C1A genome.....17  
19 7. Identification and analysis of genes containing CBM modules in strain  
20 C1A.....17

21  
22 **II. References.....18**

23  
24 **III. Supplementary figures.**

25 Figure S1. *Orpinomyces* sp. strain C1A general characteristics.....26  
26 Figure S2. Introns in C1A genome compared to other fungal genomes.....28  
27 Figure S3. Suggested N-glycan oligosaccharide structure of strain C1A.....29  
28 Figure S4. Intracellular protein trafficking in strain C1A.....30  
29 Figure S5. Phylogenetic affiliation of selected C1A plant biomass-degrading  
30 enzymes.....31  
31 Figure S6. Transcription level of genes belonging to various GH families in cellulose-  
32 versus cellobiose-grown cultures.....35  
33 Figure S7. Crystalline cellulose and xylan utilization by strain C1A.....36  
34 Figure S8. Grams of dry weight, cellulose, hemicellulose, and lignin lost in  
35 microcosms with untreated, acid-, sodium hydroxide-, or hydrothermolysis-treated  
36 switchgrass.....37  
37 Figure S9. Acids and alcohols produced during switchgrass degradation.....38

38  
39 **IV. Supplementary tables.**

40 Table S1. C1A genome sequencing effort summary.....39  
41 Table S2. Comparison between genome assembly using Illumina-only sequence data,  
42 and SMRT-Illumina hybrid assembly.....40  
43 Table S3. Gene model prediction in the C1A genome.....41  
44 Table S4. General genomic features of the C1A genome.....42  
45 Table S5. Other genomes used in this study.....43  
46 Table S6. Codon usage of strain C1A.....49

|    |                                                                                     |     |
|----|-------------------------------------------------------------------------------------|-----|
| 1  | Table S7. Transposable elements in the C1A genome.....                              | 50  |
| 2  | Table S8. Simple sequence repeats (SSRs) of the C1A genome.....                     | 51  |
| 3  | Table S9. Classification of C1A genes with no hits in Mycota (with bacterial or     |     |
| 4  | eukaryal orthologs), and with no hits in Dikarya (with basal fungal lineages        |     |
| 5  | orthologs).....                                                                     | 52  |
| 6  | Table S10. Axoneme-associated proteins of strain C1A.....                           | 53  |
| 7  | Table S11. Protease inhibitors in the C1A genome.....                               | 56  |
| 8  | Table S12. C1A proteins involved in hydrogenosomal protein import and their closest |     |
| 9  | relatives in the nr database.....                                                   | 57  |
| 10 | Table S13. Hydrogenosomal proteins of strain C1A.....                               | 58  |
| 11 | Table S14. C1A proteins involved in Fe-S protein biogenesis.....                    | 61  |
| 12 | Table S15. Transporters of strain C1A .....                                         | 62  |
| 13 | Table S16. Sugar Transporters of strain C1A.....                                    | 66  |
| 14 | Table S17. Proteases/ peptidases of strain C1A .....                                | 70  |
| 15 | Table S18. Carbohydrate-active enzymes in the C1A genome.....                       | 78  |
| 16 | Table S19. Comparison of CAZyme numbers in the C1A and various fungal               |     |
| 17 | genomes.....                                                                        | 133 |
| 18 | Table S20. Substrate degradation capability of strain C1A.....                      | 135 |
| 19 | Table S21. Genes with dockerin domain in the C1A genome.....                        | 143 |
| 20 | Table S22. Genes with CBM domain in the C1A genome.....                             | 158 |
| 21 | Table S23. Absolute and relative transcripts per million (TPM) of the top highly-   |     |
| 22 | transcribed GH genes in cellobiose- and cellulose-grown cultures.....               | 164 |
| 23 | Table S24. Absolute and relative transcripts per million (TPM) of the top highly-   |     |
| 24 | transcribed genes in cellobiose- and cellulose-grown cultures.....                  | 168 |
| 25 | Table S25. Summary of dry weight, cellulose, hemicellulose, xylan, lignin, and      |     |
| 26 | fermentable sugar losses in microcosms with different types of plant materials..... | 172 |
| 27 | Table S26. Ratios of end products produced (grams) per gram of plant biomass        |     |
| 28 | consumed by strain C1A.....                                                         | 173 |
| 29 |                                                                                     |     |

## 1 I. Results.

### 2 1. Metabolism in strain C1A.

3 ***A. Glycolysis and gluconeogenesis.*** The C1A genome encodes all the glycolytic genes  
4 involved in conversion of glucose to pyruvate. On the other hand, 2 of the key enzymes  
5 of gluconeogenesis are missing from the genome, fructose-1,6-bisphosphatase and  
6 glucose-6-phosphatase.

7 ***B. Tricarboxylic acid (TCA) cycle.*** TCA cycle appears to be incomplete in the C1A  
8 genome. The genome only encodes citrate synthase, aconitase, isocitrate dehydrogenase,  
9 succinyl-CoA synthase, fumarate reductase, and fumarase genes. No gene encoding  $\alpha$ -  
10 ketoglutarate dehydrogenase was identified. This is in accordance with prior studies that  
11 indicated that the TCA cycle enzymes in anaerobic hydrogenosome-bearing organisms  
12 have been re-targeted to the cytosol (1) where the cycle is mainly anapleurotic, providing  
13 biosynthetic intermediates (e.g  $\alpha$ -ketoglutarate, and succinyl-CoA) for biosynthesis (2).

14 ***C. Pentose phosphate pathway (PPP).*** PPP in strain C1A is incomplete. The C1A  
15 genome encodes all the enzymes of the reductive branch of the pathway. This branch is  
16 essential for the conversion of 6-carbon sugars to both the 5-carbon sugars ribose and  
17 deoxyribose (essential for purine and pyrimidine biosynthesis), and to phosphoribosyl-  
18 pyrophosphate (essential for histidine biosynthesis). On the other hand, no enzymes for  
19 the oxidative branch of the pathway (glucose-6-phosphate dehydrogenase, 6-  
20 phosphogluconolactonase, or 6-phosphogluconate dehydrogenase) were identified in the  
21 genome.

### 22 ***D. Catabolism of sugars other than glucose.***

23 ***i. Xylose.*** Anaerobic fungi have previously been shown to metabolize xylose via  
24 the bacterial route (3, 4). Indeed, the C1A genome encodes the enzymes  
25 required for xylose metabolism including xylose isomerase, xylulokinase, and  
26 ribulose phosphate 3-epimerase.

27 ***ii. Galactose.*** While a galactokinase is encoded by the genome, no homologue of  
28 UDP-glucose:hexose-1-phosphate uridylyltransferase, responsible for the  
29 conversion of galactose-1-phosphate to UDP-galactose was identified. This  
30 could explain the observed inability of strain C1A to grow on galactose.

31 ***iii. Nucleotide-sugars.*** The genome encodes enzymes essential for the synthesis  
32 of UDP-glucose, UDP-galactose, UDP-glucuronic acid, and UDP-N-  
33 acetylglucosamine. All the enzymes required for the synthesis of GDP-  
34 mannose and GDP-fucose (essential for N-glycan metabolism) from fructose-  
35 6-phosphate are also encoded by the genome. These include  
36 phosphomannomutase, mannose-6-phosphate isomerase, mannose-1-  
37 phosphate guanylyltransferase, GDP-mannose 4,6-dehydratase, and GDP-L-  
38 fucose synthase. Consistent with the fact that eukaryotes synthesize their  
39 storage polysaccharides (e.g. glycogen) from UDP-glucose, as opposed to  
40 ADP-glucose in Bacteria (5, 6), no apparent homologues for enzymes  
41 responsible for the biosynthesis of ADP-sugars were identified in the genome.  
42 Also, CMP-sugars (e.g. CMP-N-acetylneuraminic acid, CMP-N-  
43 glycolylneuraminic acid, and CMP-2-keto-3-deoxynononic acid) are  
44 apparently not synthesized by C1A due to the absence of all enzymes required  
45 for their synthesis from the genome. CMP-sugars are glycosylation precursors  
46 common to higher eukaryotes (e.g. vertebrates) (7).

1 ***E. Polysaccharides.*** The C1A genome encodes a rich repertoire of genes involved in  
2 breakdown of cellulose, hemicellulose, starch, chitin, pectin, and peptidoglycan. Strain  
3 C1A does not appear to be capable of lignin degradation. Details on the genomic and  
4 experimental evaluation of such capabilities are presented in a separate section in the  
5 manuscript and supplementary materials.

6 ***F. Myo-Inositol Synthesis.*** Myo-inositol is a polyol that constitutes the structural basis of  
7 several secondary messengers in eukaryotes, including inositol phosphates and  
8 phosphatidylinositol (8). The genome encodes enzymes responsible for conversion of  
9 glucose-6-phosphate to myo-inositol.

10 ***G. Amino acid metabolism.*** The genome encodes all the genes responsible for the  
11 biosynthesis of all amino acids from glycolytic or TCA cycle intermediates. In addition,  
12 the genome encodes enzymes for  $\beta$ -alanine (an essential precursor in pantothenate  
13 biosynthesis) biosynthesis from aspartate. Genes for glutathione biosynthesis from  
14 glycine, glutamate, and cysteine are also encoded by the genome. On the other hand, the  
15 degradation pathways of several amino acids seem to be incomplete. No homologues of  
16 glycine dehydrogenase, proline dehydrogenase, and the methionine salvage pathway  
17 enzymes were encoded by the genome. The degradation of branched-chain amino acids is  
18 also incomplete due to the absence of homologues of  $\alpha$ -keto acid oxidoreductase or  
19 dehydrogenase, and enoyl-CoA hydratase. Also, genes for the degradation of aromatic  
20 amino acids (phe, tyr, trp, his) are completely missing from the genome. Collectively,  
21 these results suggest that strain C1A is incapable of utilizing many amino acids such as  
22 glycine, proline, branched chain amino acids, and aromatic amino acids as substrates.  
23 Previous studies on amino acid utilization by fungi showed similar results where some  
24 but not all amino acids supported growth of several Dikarya fungi when utilized as sole N  
25 source (9-12). Variation between species with respect to amino acid utilization was also  
26 observed (9, 12).

27 ***H. Synthesis of N-linked glycans, O-linked glycans, and glycosphosphatidylinositol***  
28 ***(GPI) lipid anchor.***

- 29 i. ***N-linked glycans.*** N-glycosylation is one of the most common post-translational  
30 protein modifications in eukaryotic cells (13). N-linked glycans are  
31 oligosaccharides linked to asparagine residues of proteins, and are essential for  
32 proper protein folding and subsequent protein intracellular trafficking (14).  
33 Biosynthesis of the N-glycan oligosaccharide starts in the cytoplasm by  
34 transferring the sugar moiety of UDP/GDP-sugar to the lipid carrier  
35 dolichylphosphate. This is followed by flipping the oligosaccharide  
36 ( $\text{Man}_5\text{GlcNAc}_2$ ) to the luminal side of the ER membrane, where seven more  
37 sugars (4 mannosyl residues and 3 glucosyl residues) are added to the  
38 oligosaccharide unit to give the final structure  $\text{Glc}_3\text{Man}_9\text{GlcNAc}_2$ .  
39 Oligosaccharyltransferase enzyme complex then catalyzes the transfer of the  
40 oligosaccharide en-bloc to several asparagine residues of growing polypeptide  
41 chains, co-translationally. In the ER, the three glucosyl residues, as well as one  
42 mannosyl residue are trimmed. The glycoprotein then folds and is transported to  
43 the Golgi apparatus where further mannose trimming occurs via  $\alpha$ -mannosidase  
44 I, and II to produce the core oligosaccharide  $\text{Man}\alpha 1-6(\text{Man}\alpha 1-3)\text{Man}\beta 1-$   
45  $4\text{GlcNAc}\beta 1-4\text{GlcNAc}\beta 1-\text{Asn}$ . With the exception of the 3 glucosyltransferases  
46 that add the 3 glucosyl residues to the N-glycan precursor, strain C1A genome

1 encodes all the genes required for the biosynthesis of  $\text{Glc}_3\text{Man}_9\text{GlcNAc}_2$ . The  
2 genome encodes only  $\alpha$ -mannosidase I required for trimming of N-glycan to the  
3 structure  $\text{Man}\alpha 1-6(\text{Man}\alpha 1-3)\text{Man}\alpha 1-6(\text{Man}\alpha 1-3)\text{Man}\beta 1-4\text{GlcNAc}\beta 1-$   
4  $4\text{GlcNAc}\beta 1-\text{Asn}$ . No homologues of  $\alpha$ -mannosidase II (required for trimming  
5 of  $\text{Man}\alpha 1-6(\text{Man}\alpha 1-3)\text{Man}\alpha 1-6(\text{Man}\alpha 1-3)\text{Man}\beta 1-4\text{GlcNAc}\beta 1-4\text{GlcNAc}\beta 1-$   
6  $\text{Asn}$  to the core structure  $\text{Man}\alpha 1-6(\text{Man}\alpha 1-3)\text{Man}\beta 1-4\text{GlcNAc}\beta 1-4\text{GlcNAc}\beta 1-$   
7  $\text{Asn}$ ) were detected in C1A genome. Following trimming to the core structure in  
8 the Golgi, N-glycan maturation takes place to give rise to one of three  
9 structures: 1. Oligomannose N-glycans with only mannosyl residues attached to  
10 the core, 2. Hybrid N-glycans with only mannose residues attached to the  
11  $\text{Man}\alpha 1-6$  arm of the core, and one or two branches with other sugar residues  
12 attached to the  $\text{Man}\alpha 1-3$  arm, and 3. Complex N-glycans in which branches  
13 with other sugar residues initiated by N-acetylglucosaminyl transferases  
14 (GlcNAcTs) are attached to the core (15, 16). Enzymes for N-glycan maturation  
15 identified in the genome include  $\beta$ -1,4-mannosyl-glycoprotein  $\beta$ -1,4-N-  
16 acetylglucosaminyltransferase,  $\beta$ -1,4-mannosyltransferase,  $\alpha$ -1,2-  
17 mannosyltransferase, and glycoprotein  $\alpha$ -1,3-L-fucosyltransferase to give rise to  
18 a hybrid N-glycan structure as the one shown in Fig S3.

19 ii. O-linked glycosylation. O-linked glycosylation is another form of post-  
20 translational protein modification present in eukaryotes. Mucin-type O-  
21 proteoglycans are the most abundant form of O-linked glycosylation in higher  
22 eukaryotes (17). Extracellularly, mucin-type O-linked glycoproteins (those  
23 could either be secreted or attached to the membrane peripherally) serve as  
24 protective barriers to the cell, and mediate communication signals between the  
25 cell and its surroundings (17). The fundamental enzyme of mucin-type O-linked  
26 glycan biosynthesis is the UDP-N-acetyl-D-galactosamine: polypeptide N-  
27 acetyl- $\alpha$ -galactosaminyltransferase (ppGalNAcT) (17). The C1A genome lacks  
28 any apparent homologues of ppGalNAcT and hence is thought to be deficient in  
29 mucin-type O-linked glycoproteins. In the 1980s, another form of O-linked  
30 glycosylation, the O-linked- $\beta$ -N-acetylglucosamine modification on the  
31 hydroxyl group of serine or threonine residues, was discovered (18). This form  
32 of O-glycosylation modifies cytosolic and nuclear proteins as opposed to  
33 surface or membrane-attached proteins (18), and plays an important role in  
34 transcription regulation, signaling, and the cell cycle (18). The O-linked  
35 modification of proteins by a single N-acetylglucosamine residue is the result of  
36 the concerted action of 2 enzymes; O-linked N-acetylglucosaminyl transferase  
37 (OGT), and O-N-acetylglucosaminidase (18, 19). The C1A genome encodes  
38 both an OGT, as well as a  $\beta$ -N-acetylhexosaminidase, which potentially  
39 catalyzes the removal of the O-linked N-acetylglucosaminyl residue.

40 iii. Glycosphosphatidyl inositol lipid anchor. Several integral membrane proteins  
41 are linked to the plasma membrane via a glycosphosphatidylinositol (GPI) lipid  
42 anchor (20). This comprises yet another form of protein C-terminus post-  
43 translational modification. The GPI lipid core is pre-assembled via several  
44 enzymatic reactions that start on the cytosolic side of the ER and are completed  
45 in the lumen of the ER. Almost all the enzymes required for the synthesis of  
46 GPI lipid anchor from UDP-N-acetylglucosamine, phosphatidyl-inositol,

1 phosphatidyl ethanolamine, and mannose  $\beta$ -phosphodolichol are encoded by the  
2 genome. Components of the GPI-N-acetylglucosaminyltransferase and the  
3 transamidase complexes are both present. No homologues of  
4 phosphatidylinositol class G (ethanolamine phosphotransferase), or  
5 phosphatidylinositol class W (acyltransferase) were identified in the genome.

6 ***I. Purine and pyrimidine metabolism.*** The genome encodes all the genes necessary for  
7 the biosynthesis of purine and pyrimidine nucleotides.

8 ***J. Lipid metabolism.***

- 9 i. ***Fatty acids biosynthesis and degradation.*** Genes required for the synthesis of long  
10 chain fatty acids (C16-C18) from acetyl CoA were identified in the C1A genome.  
11 These include acetyl-CoA carboxylase/biotin carboxylase, fatty acid synthase  
12 fungi type  $\alpha$  and  $\beta$  subunits, fatty acid synthase animal type, 3-oxoacyl-ACP  
13 reductase, enoyl-ACP reductase II, and palmitoyl-protein thioesterase. In spite of  
14 the presence of homologues of mitochondrial trans-2-enoyl CoA reductase and  
15 palmitoyl-CoA thioesterase in the genome, mitochondrial (or hydrogenosomal)  
16 fatty acid elongation is unlikely to occur in strain C1A due to the lack of  
17 homologues of mitochondrial fatty acid elongation enzymes acetyl-CoA  
18 acyltransferase, enoyl-CoA hydratase, and long chain 3-hydroxyacyl-CoA  
19 dehydrogenase. However, very long chain fatty acids (>C18) could possibly be  
20 synthesized from long chain fatty acids in the ER. The genome encodes an acyl-  
21 CoA synthetase, an elongation of VLCFA protein 3,  $\beta$ -ketoacyl reductase, 3-  
22 hydroxyacyl CoA dehydratase, enoyl-CoA reductase, and a predicted acyl-CoA  
23 thioesterase. Strain C1A appears capable of catabolizing fatty acids. The genome  
24 harbors a long chain fatty acyl-CoA synthase, acyl-CoA dehydrogenase,  
25 multifunctional  $\beta$ -oxidation enzyme, 3-hydroxyacyl-CoA dehydrogenase, and  
26 acetyl-CoA acetyltransferase. A homologue of an unsaturated fatty acyl-CoA  
27 isomerase (dodecenoyl-CoA isomerase) is also encoded by the genome.
- 28 ii. ***Steroids.*** Sterols are important components of eukaryotic cell membranes  
29 contributing to cell membrane fluidity and participating in phagocytosis. Sterols  
30 are synthesized from acetyl-CoA in 3 distinct stages; mevalonate biosynthesis,  
31 squalene biosynthesis, and squalene oxidation to lanosterol with the subsequent  
32 differentiation to cholesterol in mammals, phytosterol in plants, and ergosterol in  
33 fungi (21). Only the last stage of squalene oxidation requires molecular oxygen.  
34 The C1A genome encodes all the enzymes for the first 2 stages of sterol  
35 biosynthesis. Since the subsequent steps of sterol synthesis require molecular O<sub>2</sub>,  
36 anaerobic eukaryotes were previously found to produce a homologue of  
37 prokaryotic hopane, tetrahymanol, as their cell membrane sterol. Tetrahymanol is  
38 a triterpenol that does not require molecular O<sub>2</sub> for biosynthesis (22). We  
39 identified squalene-tetrahymanol cyclase in the C1A genome. Thus it appears that  
40 *Orpinomyces*, similar to other anaerobic eukaryotes, synthesizes tetrahymanol as  
41 its membrane sterol as previously suggested for *Piromyces communis* (22, 23).
- 42 iii. ***Glycerolipids and glycerophospholipids biosynthesis.*** sn-Glycerol-3-phosphate is  
43 the precursor of glycerolipids and glycerophospholipids, both of which are  
44 constituents of the cell membrane. sn-Glycerol-3-phosphate can be synthesized  
45 from glyceraldehyde phosphate (an intermediate in glycolysis) via glycerol-3-  
46 phosphate dehydrogenase (NADP), which is encoded in the C1A genome. The

1 genome also encodes all the enzymes required for the biosynthesis of mono-, di-,  
2 and triacylglycerol. All the enzymes required for the synthesis of  
3 glycerophospholipids precursors, CDP-glycerol, CDP-diacylglycerol, CDP-  
4 ethanolamine, and CDP-choline, are encoded by the genome. The genome also  
5 encodes enzymes required for synthesis and degradation of phosphatidyl-serine,  
6 phosphatidyl-ethanolamine, phosphatidyl-choline, phosphatidyl-inositol, and  
7 cardiolipin (the phospholipid known to occur in the inner mitochondrial  
8 membrane and is most probably present in strain C1A hydrogenosomal  
9 membrane).

10 ***K. Cofactors and vitamins.*** The genome encodes all the enzymes responsible for  
11 biosynthesis of riboflavin, pyridoxal phosphate, nicotinate and nicotinamide,  
12 pantothenate, coenzyme A, and folic acid. Strain C1A might be auxotrophic for thiamine  
13 and biotin: Homologues of thiamine biosynthetic enzymes ThiI (essential for the  
14 formation of a thiocarboxylate on the carboxylic acid group of the carboxyl-terminal  
15 glycine of the ThiS protein), ThiG (catalyzing with ThiH the conversion of 1-deoxy-D-  
16 xylulose 5-phosphate to thiazole), and ThiC (catalyzing the conversion of 5-  
17 aminoimidazole ribonucleotide (AIR) into 4-amino-2-methyl-5-  
18 hydroxymethylpyrimidine (HMP)) are missing from the genome. Similarly, many of the  
19 enzymes for biotin biosynthesis e.g. 6-carboxyhexanoate--CoA ligase, 8-amino-7-  
20 oxononanoate synthase, adenosylmethionine-8-amino-7-oxononanoate aminotransferase,  
21 dethiobiotin synthetase are also missing.

22 **2. Genetic information processing in strain C1A.** We analyzed the genetic information  
23 processing machinery in strain C1A, and compared it to what has been observed in  
24 eukaryotic genomes in general, and Dikarya genomes in particular. Our goal was to  
25 determine whether the basal phylogenetic affiliation, or the unique habitat, has influenced  
26 genetic information processing in the *Neocallimastigomycota* through reductive evolution  
27 or horizontal gene transfer of prokaryotic genes, similar to what was observed in plant  
28 polysaccharide degradation machinery, and other metabolic capabilities. Overall, our  
29 results indicate that the C1A genome possesses a thoroughly eukaryotic machinery, with  
30 no evidence for absence, or modification of salient genes/pathways when compared to  
31 other available eukaryotic genomes.

### 32 ***A. DNA replication, transcription, and translation.***

33 ***DNA Replication.*** The C1A genome encodes a complete and thoroughly eukaryotic DNA  
34 replication machinery composed of DNA replication initiation factors (pre-replication  
35 complex, GINS complex), DNA replication elongation factors (primase complex,  
36 polymerase  $\epsilon$  and  $\delta$  complexes, replication factor A, and C), and DNA replication  
37 termination factors. Strain C1A clearly possesses all the hallmarks for eukaryotic DNA  
38 replication (24). These include (i) the presence of different DNA-dependent DNA  
39 polymerases for the leading and lagging DNA strands (25), where the C1A genome  
40 encodes all 4 subunits of  $\delta$  DNA-dependent DNA polymerase for the lagging strand  
41 replication, and all 4 subunits of  $\epsilon$  DNA-dependent DNA polymerase for the leading  
42 strand replication, (ii) the presence of histones around which DNA winds to form  
43 nucleosomes, where the genome encodes histones H2A, H2B, H3, H4, as well as the  
44 linker histones H1/5, and (iii) the presence of telomeres, where the genome encodes  
45 RNA-dependent DNA polymerases (telomerase reverse transcriptase), as well as  
46 telomere length regulation protein.



1 Transcription. Similarly, a thoroughly-eukaryotic transcription machinery is identified in  
2 the C1A genome (26, 27): the C1A genome harbors all subunits of RNA polymerases I,  
3 II, and III and their associated transcription factors. Further, genes encoding enzymes  
4 mediating specific eukaryotic transcription processes, e.g. mRNA 5' end cap addition,  
5 mRNA 3' end polyA tail addition, and splicing (28) are also encoded by the C1A genome.  
6 In addition to RNA polymerase and transcription factors, the initiation of transcription in  
7 eukaryotes requires multi-subunit cofactors including the mediator complex, as well as  
8 various chromatin modifying or remodeling co-activator complexes (29). The genome  
9 encodes a wealth of such upstream-acting elements.

10 Translation. A complete set of aminoacyl-tRNA synthetases was detected in the genome.  
11 All but two of the large and small ribosomal proteins were identified in the C1A genome,  
12 as well as various ribonucleoproteins and enzymes involved in ribosome biogenesis.  
13 tRNA processing, splicing, transport, modification, and degradation factors are also  
14 encoded by the genome.

15 ***B. Cytoskeleton.*** Eukaryotic cytoskeleton is a dynamic structure that combines the  
16 activities of several proteins and organelles to help connect the cell to its surroundings, as  
17 well as enable movement and division (30). The eukaryotic cytoskeleton is comprised of  
18 three main building blocks: actin filaments (microfilaments), tubulin filaments  
19 (microtubules), and intermediate filaments. Both microfilaments and microtubules are  
20 associated with cytoskeletal motors; myosins for microfilaments, and kinesins and  
21 dyneins for microtubules, which mediate directional movement (30, 31). Intermediate  
22 filaments are generally absent in Fungi (32). The C1A genome encodes an extensive  
23 cytoskeleton machinery, including microfilaments (actins and actin-binding proteins),  
24 microtubules (tubulins), and cytoskeletal motors.

25 ***C. Intracellular protein trafficking.*** Detailed analysis of the complex trafficking  
26 pathways clearly indicates that strain C1A possess a complete machinery for intracellular  
27 protein trafficking. A general view of these pathways in strain C1A is shown in Figure  
28 S4. In eukaryotic cells, protein synthesis occurs in the cytosol. Proteins that are not  
29 destined for secretion are synthesized on free ribosomes (Fig S4). These proteins will  
30 either remain in the cytosol (cytosolic proteins, Fig S4, route 1), be transported to the  
31 nucleus (nuclear proteins, Fig S4, route 2), or could be imported into the hydrogenosome  
32 (hydrogenosomal proteins, Fig S4, route 3), or peroxisome (peroxisomal proteins, Fig S4,  
33 route 4). The C1A genome encodes a near complete list of the nuclear pore complex  
34 components as well as importins for protein import into the nucleus, a near complete  
35 hydrogenosomal import machinery, almost all of the peroxins involved in protein  
36 transport across the peroxisomal membrane, and peroxisomal integral membrane  
37 proteins.

38 On the other hand, proteins synthesized on membrane-bound ribosomes of the  
39 rough endoplasmic reticulum (RER) could either be secreted (secretory pathway, Fig S4,  
40 blue arrows), or enter the endosomal system and eventually be degraded in the lysosome  
41 (endosomal pathway, Fig S4, green arrows). The later 2 pathways will be further  
42 discussed below. The general secretory intracellular protein trafficking apparatus in  
43 eukaryotes was uncovered almost 40 years ago (33), where it was deciphered that  
44 proteins move between compartments via vesicle formation and fusion (33, 34). Proteins  
45 are transported into the ER lumen via the sec61/62/63 complex (Fig S4, route 5) (14). All  
46 subunits of the sec61 translocon as well as signal recognition particle components are

1 encoded by the genome. In the ER, proteins are modified with N-glycans and properly-  
2 folded proteins are transported to the Golgi via COPII vesicles (Fig S4, route 6) (14). All  
3 components of the COPII coatamer are encoded by the genome. Misfolded proteins are  
4 subjected to the ER-associated protein degradation (ERAD), and are eventually degraded  
5 in the proteasome (14). All the components of the ERAD and proteasomal protein  
6 degradation are encoded by the genome. In the Golgi, properly-folded proteins are  
7 transported between cisternae via retrograde COPI transport vesicles (Fig S4, route 7)  
8 (35). COPI-mediated vesicle transport is also responsible for recycling ER-resident  
9 proteins back to the ER (Fig S4, route 8) (35). COPI coatamer components are encoded  
10 by the genome. From the Golgi, proteins are transported to the trans Golgi network  
11 (TGN) again via COPI transport vesicles (Fig S4, route 9). In the TGN, proteins are  
12 sorted either to the plasma membrane (exocytosis) (Fig S4, route 10), or to the endosomal  
13 system (Fig S4, route 11)(36). Trafficking from the TGN to the plasma membrane  
14 requires at least protein kinase D, protein kinase C  $\eta$ , phosphatidylinositol 4-kinase III- $\beta$ ,  
15 goodpasture antigen binding protein (START domain), and  
16 phosphatidylinositol/phosphatidylcholine transfer protein (sec14/PDR16) (37), all of  
17 which are encoded by the genome. Exocytosis itself requires AP-1 complex components,  
18 and exocyst subunits (38), homologues of all of which were identified in the genome. On  
19 the other hand, endosomal transport of proteins occurs via clathrin-coated vesicles (39).  
20 Components of the vesicle coat as well as factors essential for membrane curvature,  
21 budding and scission are all encoded by the genome. Transport into the lysosome  
22 requires multivesicular body (MVB) sorting (40). Endosomal sorting complex required  
23 for transport (ESCRTs) are involved in the sorting of proteins into multivesicular bodies  
24 (MVBs), generating the intraluminal vesicles (40). All components of the ESCRT  
25 complexes have been identified in the genome. Soluble acid hydrolases destined to the  
26 lysosome are modified in Golgi by mannose-6-phosphate residues (by the action of UDP-  
27 N-acetylglucosamine:lysosomal enzyme N-acetylglucosamine-1-phosphate transferase)  
28 to be recognized by mannose-6-phosphate receptors, followed by packaging in clathrin-  
29 coated vesicles and transport to the endosomal system (41). While the genome encodes  
30 UDP-N-acetylglucosamine:lysosomal enzyme N-acetylglucosamine-1-phosphate  
31 transferase, no homologues of mannose-6-phosphate receptors (cation-dependent or  
32 cation-independent) were identified. However, the genome encodes a sortilin Vps10-like  
33 homologue, which might be involved in lysosomal enzymes transport to the vacuole (42).  
34 Retrograde trafficking components (Vps26, Vps29, Vps35, and sorting nexins 1 and 2)  
35 implicated in recycling lysosomal hydrolase receptors from the lysosome to the TGN (Fig  
36 S4, route 12) (42) are all encoded by the genome. All vesicular transport events require  
37 vesicle tethering, and fusion. These 2 events are mediated by vesicle tethering complexes,  
38 and SNAREs, respectively (43, 44). Several SNAREs and vesicle tethering complexes  
39 were identified in the genome.

40 **3. Salient differences identified between the C1A genome and those of Dikarya**  
41 **Fungi.** Detailed comparison of various cellular processes in the C1A genome to available  
42 fungal genomes identified multiple processes, in which strain C1A possesses  
43 genes/pathways/machineries that are not usually associated with members of the Dikarya.  
44 Rather, many of these are more associated with non-fungal Opisthokonta e.g.  
45 Choanoflagellate, *Capsaspora owczarzaki*, and metazoa, as well as other multicellular  
46 eukaryotes. In some instances, such genes could also be observed in some or all

1 examined basal fungal genomes, while in other cases, these differences appear to be  
2 unique to the C1A genome. Examples include members of intramembrane proteases,  
3 post-translational modification enzymes, focal adhesion, axoneme and intraflagellar  
4 transport, and protease inhibitors. Details are shown below and are summarized in Table  
5 1, Tables S10-11.

6 3.1. Intra-membrane proteases. Intra-membrane proteases (IMPs) are integral membrane  
7 proteolytic enzymes that function in cleaving trans-membrane domains of other integral  
8 membrane proteins. Four families of IMPs are recognized: 1. The aspartyl protease  
9 presenelin (the active protease of the  $\gamma$ -secretase complex), 2. The site 2 protease family  
10 (S2P) metalloprotease, 3. The signal peptidase family serine protease, and 4. The  
11 rhomboid family serine protease (45). Out of the four IMP families, both the signal  
12 peptidase family serine protease and the rhomboid serine protease are ubiquitous in fungi  
13 (46).

14 We analyzed the occurrence and distribution of intramembrane proteases in the C1A  
15 genome, basal and Dikarya fungal genomes, and Opisthokonta and higher eukaryotic  
16 genomes. The analysis revealed salient differences between strain C1A intramembrane  
17 protease machinery and Dikarya machineries in both the aspartyl protease presenelin ( $\gamma$ -  
18 secretase complex), and the site 2 protease family (S2P) as detailed below.

- 19 a. The  $\gamma$ -secretase intra-membrane protease complex is an integral multi-subunit  
20 protease complex containing at least 4 proteins: 1. Presenelin (the active site of  
21 the enzyme complex), 2. Nicastrin, 3. Anterior pharynx defective-1 protein (APH-  
22 1), and 4. Presenelin enhancer-2 (47-49). Nicastrin helps recognize the substrate  
23 for proteolytic cleavage that is carried out by presenelin. Presenelin enhancer-2  
24 and APH-1 proteins help stabilize the complex (47). The C1A genome encodes 2  
25 homologues of presenelin, 3 homologues of nicastrin, 1 homologue of APH-1,  
26 and 1 homologue of presenelin enhancer-2 (Table 1). Comparative analysis  
27 indicated that none of the  $\gamma$ -secretase intra-membrane protease complex  
28 components are present in any of the Dikarya genomes examined (74 genomes),  
29 and few nicastrin, presenelin, and APH-1 proteins could be identified in basal  
30 fungal genomes examined (*Spizellomyces punctuatus* DAOM BR117,  
31 *Batrachochytrium dendorobotidis* JEL423, and *Allomyces macrogynus*  
32 ATCC38327, *Rhizopus oryzae* RA 99-880). We further compared C1A  $\gamma$ -  
33 secretase proteins to the genomes of 2 Opisthokonts; *Monosiga brevicollis* (a  
34 choanoflagellate thought to represent the closest relative to Metazoa (50)), and  
35 *Capsaspora owczarzaki* (representing an independent unicellular lineage closely  
36 related to animals and choanoflagellates (51)). Multiple C1A nicastrin (2 of the 3  
37 homologues), APH-1, and presenelin were identified in both genomes, while Pen-  
38 2 was only observed in the genome of *Capsaspora owczarzaki* (Table 1). An  
39 examination of the Merops (52) and Interpro (53) databases shows that in general  
40 components of the  $\gamma$ -secretase complex are represented in Kingdom Animalia  
41 (mainly Chordata, Arthropoda, and Nematoda), Kingdom Plantae, and few  
42 representatives in Amoebozoa, Euglenozoa, and Archaea.
- 43 b. The Site 2 protease (S2P) family of intramembrane metalloprotease belongs to the  
44 M50 family of proteases (52). The role of S2P proteases are mainly involved in  
45 cleaving different membrane-tethered transcription factors, e.g. sterol regulatory  
46 element binding protein (54). According to the Merops database, two M50

1 subfamilies were characterized; M50A and M50B (52). Members of subfamily  
2 M50A are mainly represented in kingdom Animalia, specifically phylum  
3 Chordata, with few representatives in Kingdom Plantae, and Kingdom Protozoa,  
4 and some representatives in Archaea. M50B subfamily members on the other  
5 hand are mainly represented in Archaea, Bacteria, with very few examples in  
6 Animalia (only 1 example in Chordata), Fungi, Plantae, and Protozoa (55). The  
7 C1A genome encodes 1 gene annotated as S2P protease belonging to subfamily  
8 M50A that has not been previously identified in Fungi (Table 1). Indeed, analysis  
9 of Dikarya fungal genomes failed to identify any members of the M50A protease,  
10 while the basal fungal genome *Spizellomyces punctuatus* DAOM BR117 encodes  
11 an M50 protease. On the other hand, analysis of *Monosiga brevicollis* and  
12 *Capsaspora owczarzaki* resulted in the identification of subfamily M50A  
13 proteases, similar to C1A homologues. M50A homologues were thus identified in  
14 C1A, *Spizellomyces punctuatus* DAOM BR117, *Monosiga brevicollis* and  
15 *Capsaspora owczarzaki*, but not in Dikarya fungal genomes.

16 3.2. Post-translational protein modification. Post-translational modifications of eukaryotic  
17 proteins include phosphorylation (ser, thr, tyr), acylation (acetylation of lys, N-  
18 myristoylation of gly, S-palmitoylation of cys, mono-, and polyubiquitination of lys),  
19 alkylation (methylation of lys and arg, prenylation of cys), and glycosylation (N-  
20 glycosylation of asn, O-glycosylation of ser) (13). Post-translational modifications of  
21 proteins are essential for their function, folding, and/or intracellular fate (13). As detailed  
22 above, proteins destined for secretion are co-translationally N-glycosylated in the ER,  
23 followed by trimming of the N-glycan oligosaccharidyl residues to the core  
24 oligosaccharide in the Golgi. In the Golgi, maturation from the core oligosaccharide takes  
25 place to give rise to one of three N-glycan structures; oligomannose, hybrid, or complex  
26 N-glycans. Strain C1A appears to be capable of post-translational protein fucosylation, a  
27 type of N-glycosylation that occurs on the first N-acetylglucosaminyl residue of the N-  
28 glycan oligosaccharide linked to Asn residues of the modified protein. Fucosylation is a  
29 post-translational protein modification that has not been previously observed within the  
30 Mycota. The genome encodes glycoprotein  $\alpha$ -1,3-L-fucosyltransferase activity. This  
31 enzyme is known to catalyze the transfer of a fucosyl moiety from GDP-fucose (the C1A  
32 genome encodes all the genes required for its biosynthesis) to the first N-  
33 acetylglucosaminyl residue of N-glycan to form an  $\alpha$ -1,3 linkage. While fucosylation of  
34 N-acetylglucosamine residues of N-glycans is known to occur in vertebrates,  
35 invertebrates, and plants, the  $\alpha$ -1,3 linkage is only known to occur in insects, plants, and  
36 invertebrates (e.g., *Schistosoma*, *Haemonchus*, *Lymnaea*) (16). Indeed, the closest relative  
37 to C1A fucosyltransferases was *Nicotiana tabacum*. Comparison to other genomes  
38 identified similar fucosyltransferases in *Rhizopus oryzae* RA 99-880. In all Dikarya  
39 genomes currently available in Genbank database, only one gene annotated as  
40 "hypothetical protein" in *Puccinia graminis* (EFP84060) with low sequence similarity to  
41 plant fucosyltransferases has been identified. No similar fucosyltransferases to that  
42 observed in C1A were identified in *Monosiga brevicollis* and *Capsaspora owczarzaki*  
43 Opisthokonts genomes.

44 3.3. Focal adhesions. In filamentous fungi within the Dikarya, surface attachment and  
45 association with the extracellular matrix (ECM) is known to occur via extracellular  
46 "glue" secreted by conidial structures (e.g. adhesin) (56). The C1A genome encodes a

1 putative cell wall adhesin similar to that of *Candida albicans*. On the other hand, focal  
2 adhesions (FA) are large multiprotein intracellular assemblies that mediate interaction  
3 between the ECM and the cell interior by promoting cell anchorage and mechanical  
4 adhesion to the ECM as well as act as signaling milieu where signaling proteins are  
5 concentrated at sites of integrin binding and connect the cell's cytoskeleton to the ECM  
6 (57). FA appears to be absent from filamentous fungi, and more common in other  
7 eukaryotes (Amoebozoa, Metazoa (sponges, placozoans, and cnidarians), and Holozoa  
8 (58).

9 During FA, integrin ( $\alpha$ ,  $\beta$ ) binds to extracellular proteins of ECM via its  
10 extracellular domains. Within the cell, integrin connect to the cytoskeleton via adaptor  
11 proteins (e.g.  $\alpha$ -actinin, talin, paxillin, vinculin) that bind to integrin intracellular domains  
12 (57). This integrin-adaptor-ECM protein complex forms the basis of FA with which other  
13 proteins, particularly those involved in intracellular signaling, associate. These include  
14 the heterotrimer IPP complex (Integrin-linked kinase, PINCH, and  $\alpha$ -parvin), and the 2  
15 kinases, FAK (focal adhesion kinase), and c-Src tyrosine kinases known to accumulate at  
16 the FA site (58). Analysis of the C1A genome indicates that it encodes multiple integrin-  
17 adaptor proteins (e.g. Talin, vinculin,  $\alpha$ -parvin,  $\alpha$ -actinin, Band 4.1, paxillin), and several  
18 FA-associated signaling proteins (e.g. integrin-linked kinase, Nck, Nck-associated protein  
19 1), as well as downstream signaling protein (e.g. ROCK) (Table 1). However, no  
20 homologues of integrins, FAK, and c-Src kinase were identified in the C1A genome. This  
21 is similar to what was observed in prior studies (58), where it was suggested that basal  
22 fungi seemed to have kept some or all of the IPP complex components, and the  
23 scaffolding proteins, but lost the integrins and FAK and c-Src kinase during the course of  
24 their evolution from their unicellular Opisthokont ancestor. The same study (58)  
25 identified all components of FA in the Opisthokont *Capsaspora owczarzaki*, but not  
26 *Monosiga brevicollis*, and suggested that the focal adhesion machinery originated before  
27 the divergence of *C. owczarzaki* from choanoflagellates+Metazoa, but likely after the  
28 Fungi+nucleariidi+fonticulid clade had split from Holozoa. Our analysis of the C1A  
29 genome fits well with that conclusion (58). Strain C1A seemed to have lost integrins,  
30 FAK, and src-kinase, but kept all IPP components as well as the scaffolding proteins. The  
31 exact cellular function of FA proteins in the absence of integrins, FAK, and src-kinase in  
32 strain C1A is unclear. The process occurring intracellularly during FA and its connection  
33 to the actin cytoskeleton is reviewed in (59). Phosphatidylinositol-4,5-bisphosphate  
34 (PIP<sub>2</sub>) in the membrane stimulates the accumulation of FA proteins, and activates the  
35 actin filament cross-linker,  $\alpha$ -actinin. Following their accumulation, FA proteins interact  
36 with the actin cytoskeleton to increase actin polymerization, promote actomyosin  
37 assembly, and stabilize the actin filament. Downstream effects on actin cytoskeleton are  
38 mediated by Rho kinase. Activation of Rho kinase through the fine-tuning of Rho-GEF  
39 (stimulatory) and Rho-GAP (inhibitory) activities leads to (1) activation of Diaphanous  
40 (GDIA) that in turn activates profilin causing polymerization of G-actin, (2) activation of  
41 ROCK (Rho-associated protein kinase) that has an inhibitory effect on myosin light chain  
42 phosphatase (MLCP) keeping myosin light chain (MLC) in the phosphorylated (P) active  
43 form (via the action of myosin light chain kinase (MLCK)) to interact with actin, and (3)  
44 a stimulatory effect on LIM kinase (LIMK) causing it to phosphorylate and inhibit  
45 cofilin, thereby inhibiting its actin-depolymerizing activity.

1 3.4. Evidence for the presence of an axoneme in the C1A genome. Ciliated and  
2 flagellated eukaryotic cells are known to possess a microtubule-based cytoskeletal  
3 structure called the axoneme that acts as a scaffold for other protein complexes including  
4 motor proteins (e.g kinesin, and dynein) that are essential for intraflagellar transport (IFT)  
5 of proteins (60). Neocallimastigomycota, and other basal fungi produce flagellated  
6 zoospores. The genome shows evidence for the presence of an axoneme and IFT in  
7 *Orpinomyces* strain C1A. Table S10 provides a summary of proteins in the C1A genome  
8 that are thought to be associated with the axoneme or involved in IFT. The genome  
9 encodes both axonemal structural components including axonemal dynein (heavy,  
10 intermediate, and light chains), radial spokes, ribbon, nexin-dynein regulatory complex  
11 components, and outer dynein arm docking complex components. When compared to  
12 other fungal genomes, all axonemal structural components of the C1A genome were  
13 absent from Dikarya Fungal genomes. Several basal body assembly proteins (61, 62)  
14 including B9 domain, meckelin, FOP dimerization domain, and Cep290 were also  
15 identified in the genome. Due to the absence of ribosomes in the axoneme, proteins are  
16 encoded in the cytosol then transported to the axoneme via IFT particles composed of  
17 IFT complexes A and B with their accessory components as well as the Bardet Biedl  
18 syndrome complex (BBSome) components (63). Homologues of all IFT and BBSome  
19 components were identified in the C1A genome (Table S10). When compared to other  
20 fungal genomes, IFT complexes A and B homologues were identified in basal but not  
21 Dikarya fungal genomes, while BBSome complex components were not identified in any  
22 other fungal genome (Table S10).

23 3.5. *Protease inhibitors.* The C1A genome also encodes several protease inhibitors that  
24 are not encountered in other fungal genomes. Table S11 lists protease inhibitors in the  
25 C1A genome identified using the MEROPS database (52). Strain C1A protease inhibitors  
26 belonged to MEROPS families I4, I32, and I42.

27 I4 Protease inhibitors are known serine protease inhibitors (serpins). Serpins of  
28 family I4 are present mostly within eukaryotic metazoan phyla (Arthropoda, Chordata,  
29 and Nematoda), and have also been identified in Bacteria and Archaea. While abundant  
30 in the C1A genome, I4 proteases have not previously been encountered in Fungi. Indeed,  
31 no I4 serine proteases were identified in either basal or Dikarya fungi, or in the genomes  
32 of *Capsaspora owczarzaki*, and *Monosiga brevicollis* genomes.

33 It has been previously demonstrated that bacterial commensals of the mammalian  
34 gastrointestinal tract produce serpins as defense mechanism against proteolysis by the  
35 host elastases (64). A similar function could be attributed to C1A serpins where its  
36 habitat in the cow rumen exposes it to a highly proteolytic environment (65). Dockerin or  
37 chitin-binding domains were present in some of C1A serpins as previously documented  
38 in *Piromyces* sp. E2 (66), further emphasizing serpins suggested extracellular role of  
39 protection against proteases. C1A serpins were closely related to *Piromyces* sp. E2  
40 serpins.

41 Cysteine protease inhibitors of family I42 have previously been identified within  
42 the Bacteria and Archaea. In eukaryotes, they appear to be restricted to Protozoa (phyla  
43 Apicomplexa, and Sarcomastigophora). Comparison of cysteine protease inhibitors  
44 belonging to family I42 in the C1A genome against other fungal genomes identified  
45 homologues only in the basal fungal genome of *Allomyces macrogynus*. No homologues

1 of family I42 were identified in Dikarya fungal genomes or in the 2 Opisthokont genomes  
2 of *Capsaspora owczarzaki*, and *Monosiga brevicollis*.

3 Cysteine protease inhibitors of family I32 are eukaryotic proteins that are present  
4 within the Metazoa (phyla Arthropoda, Chordata, Nematoda), Fungi, with few  
5 representatives in Protozoa, and no representatives in plants. C1A I32 homologues were  
6 identified in both basal (*Spizellomyces punctatus* DAOM BR117), as well as most  
7 Dikarya Fungal genomes. No homologues of family I32 were identified in the 2  
8 Opisthokont genomes *Capsaspora owczarzaki*, and *Monosiga brevicollis*. It is interesting  
9 to note that lysates of rumen protozoa were shown to possess cysteine protease (caspase)  
10 activity (67). C1A cysteine protease inhibitors (I32, and I34) could potentially be aimed  
11 at protozoal caspases released into the rumen following protozoal cell lysis.

#### 12 **4. Hydrogenosomal structure and function in strain C1A.**

13 4.1. Protein import system. Anaerobic fungi, as well as anaerobic ciliates and flagellates  
14 are known to possess double-membrane hydrogenosomes whose main function is ATP  
15 production via substrate level phosphorylation and hydrogen production (68-70). We  
16 examined the C1A genome to identify genes involved in protein, solutes, and ATP/ADP  
17 hydrogenosomal transport, as well as various biosynthetic and metabolic processes  
18 occurring within the hydrogenosome (Figure 3). We compared the distribution, function,  
19 and phylogenetic affiliation of these identified genes, with those observed in fungal  
20 genomes, as well as those observed in the hydrogenosomes of model microeukaryotes e.g.  
21 *Trichomonas vaginalis*.

22 The general eukaryotic mitochondrial protein import system encountered in  
23 aerobic fungi and the majority of eukaryotes (71) is composed of: 1. An outer  
24 mitochondrial membrane translocase TOM complex (at least 7 proteins), 2. Sorting and  
25 assembly machinery of the outer membrane SAM (5 proteins), 3. Mitochondrial  
26 intermembrane space import and assembly MIA (3 proteins), 4. Intermembrane space  
27 chaperones small TIMs (4 proteins), 5. Translocase of the inner mitochondrial membrane  
28 TIM22 (at least 6 proteins), 6. Presequence translocase of the inner mitochondrial  
29 membrane TIM23 (4 proteins) and several presequence translocase-associated motor  
30 proteins (7 proteins) (72, 73). The C1A genome encodes a near-complete  
31 hydrogenosomal protein import system with components of the TOM outer membrane  
32 transport system (4 out of 7 genes), the SAM sorting and assembly complex (4 out of 5  
33 genes) for protein insertion in the outer membrane, the MIA intermembrane space import  
34 and assembly complex (2 out of 3 genes), small TIMs (2 out of 4 genes), the TIM22  
35 complex for protein insertion in the inner membrane (6 out of 6 genes), and the inner  
36 membrane transport system and associated motor (TIM23 complex, 10 out of 11 genes)  
37 (Figure 3 and Table S12).

38 Secondary losses of small TIMs and the TIM22 complex components, as well as  
39 simplification of the TOM, SAM, and TIM23 complexes were observed in both  
40 hydrogenosome-harboring (e.g. the Parabasalia *Trichomonas vaginalis*), and mitosome-  
41 harboring (e.g. the microsporidian *Encephalitozoon cuniculi*, and the amoebozoan  
42 *Entamoeba histolytica*) organisms. For example, the hydrogenosomal import machinery  
43 of *Trichomonas vaginalis* has been reduced to a few outer membrane proteins (Tom40,  
44 Sam50, Hmp35, and Hmp36), a few inner membrane proteins (Tim17/22/23, Tim 44, and  
45 PAM16, 18), and one highly modified intermembrane small TIMs (74). The reduced  
46 hydrogenosomal import machinery in *Trichomonas vaginalis* is thought to be a specific

1 adaptation to life under anaerobic conditions (74). Such a drastic reduction was not  
2 observed in the C1A genome in spite of the anaerobic lifestyle. Further, examining the  
3 phylogenetic affiliation of hydrogenosomal import proteins in strain C1A clearly  
4 demonstrates their fungal origin (Table S12). This near complete machinery and fungal  
5 affiliation of protein import system in C1A hydrogenosome could be explained by the  
6 relatively recent adaptation of Neocallimastigomycota to anaerobic gut habitats (75),  
7 compared to earlier adaptation dates of Parabasilia and Amoebozoa.

8 4.2. Identification of hydrogenosomal-bound proteins. Using the approach outlined in  
9 supplementary methods, we bioinformatically identified 46 hydrogenosomal proteins in  
10 the C1A genome. Table S13 shows the predicted C1A hydrogenosomal proteins. Proteins  
11 predicted to be imported into the hydrogenosomal matrix included several hypothetical  
12 proteins, Fe-S cluster assembly and maturation proteins, pyruvate metabolism and energy  
13 production enzymes, peptidases, as well as intraluminal chaperones and co-chaperones  
14 (Table S13).

15 4.3. Hydrogenosomal Fe-S cluster assembly. Eukaryotic Fe-S clusters are cofactors  
16 catalyzing a plethora of biological reactions in the mitochondria, cytosol, as well as the  
17 nucleus (76). Mitochondria, and mitochondria-like organelles, e.g. hydrogenosomes (70)  
18 are essential for Fe/S protein biogenesis. The C1A genome encodes genes involved in Fe-  
19 S cluster assembly, and maturation. Table S14 summarizes C1A proteins involved in  
20 Fe/S cluster assembly, export, and cytosolic Fe/S protein maturation. Biogenesis of  
21 mitochondrial Fe-S clusters starts by the import of ferrous iron via the inner membrane  
22 carriers Mrs3/4 (76, 77). Fe/S clusters are synthesized by the early components of the ISC  
23 machinery including cysteine desulfurase, frataxin, and ferredoxin, and are transiently  
24 bound by the scaffold protein IscU. The Fe/S cluster is then transferred from IscU to the  
25 recipient apoprotein via the late components of the ISC machinery including the  
26 chaperone Ssq1, the cochaperone Jac1, the nucleotide exchange factor Mge1, in presence  
27 of monothiol glutaredoxin to form the holoprotein. The accessory proteins Isa1 and Isa2  
28 are specifically required for the activation of mitochondrial aconitase. Extramitochondrial  
29 assembly of Fe/S proteins require the mitochondrial ISC machinery, the mitochondrial  
30 ISC export machinery, and the cytosolic CIA machinery (76-78). First, an unknown  
31 compound is transferred via the ABC transporter Atm1 to the cytosol to aid in Fe/S  
32 protein maturation. Glutathione and the sulfhydryl oxidase Erv1 of the intermembrane  
33 space participate in the export. In the cytosol, the Fe/S clusters are assembled on the  
34 scaffold proteins Cfd1, and Nbp35. The Fe/S clusters are then transferred to the cytosolic  
35 apoproteins via Nar1 and Cia1.

### 36 **5. Transporters in the C1A genome.**

37 The genome encodes 339 transporter genes belonging to 38 different transporter families.  
38 Table S15-16 summarizes the results of the C1A genome comparison to the transporter  
39 classification database (79). The majority of transporters (36% of the total transporters)  
40 are secondary transporters. These include sodium symporters (amino acid: Na<sup>+</sup>, organic  
41 anion: Na<sup>+</sup>, and inorganic anion: Na<sup>+</sup>), sodium antiporters (Ca<sup>2+</sup>: Na<sup>+</sup>, and drug :Na<sup>+</sup>),  
42 proton symporters (amino acid: proton, sugar: proton, polyol: proton, nucleoside: proton,  
43 and peptide: proton), proton antiporters (Ca<sup>2+</sup>: proton, heavy metal: proton, drug: proton,  
44 Fe: proton, K<sup>+</sup>: proton, Na<sup>+</sup>: proton, and Cl<sup>-</sup>: proton), and antiporters for nucleotide-sugar:  
45 nucleotide, ADP:ATP, bicarbonate:Cl<sup>-</sup>, and oxoglutarate:malate. The ATP-dependent  
46 transporters constitute 32% of the total transporters encoded by the C1A genome. These



1 include: 1. Uptake transporters for sugars, polar amino acids, iron-chelate, and  
2 siderophore-Fe<sup>3+</sup>, 2. Exporters for drugs, drug-conjugates, heavy metal, and acetate, 3.  
3 Ca<sup>2+</sup> transporters in the lysosome, Golgi, and ER, and 4. Phospholipid transporters  
4 including Golgi phosphatidylserine, phosphatidylethanolamine translocase, phospholipid  
5 uptake flippase, inwardly-directed phospholipid and lyso- phospholipid flippase, and  
6 plasma membrane inwardly-directed phosphatidylcholine, phosphatidylserine, lyso-  
7 phosphatidylethanolamine flippase, and ATPase pumps (V-type). Finally, the genome  
8 encodes ion channels and pores constituting 31% of the total transporters including  
9 voltage-gated ion channels for Na<sup>+</sup>, Ca<sup>2+</sup>, and K<sup>+</sup>, transient receptor potential Ca<sup>2+</sup>  
10 channels, water transporters, ammonia transporters, mechanosensitive ion channels, Al<sup>3+</sup>,  
11 and Mn<sup>2+</sup> resistance transporters, as well as voltage-dependent anion channel for Cl<sup>-</sup>. This  
12 distribution of transporters in the C1A genome with almost one third of transporters  
13 belonging to one of the three major groups of transporter families (ATP-dependent, ion  
14 channels, and secondary transporters), is in contrast to other fungal genomes that seem to  
15 have 70-80% of their transporters belonging to the secondary group of transporters, with  
16 only 20-30% belonging to the other 2 groups (<http://www.membranetransport.org/>).

17 C1A sugar transporters belong to three major families; the major facilitator  
18 superfamily (MFS), the glycoside-pentoside-hexuronide:cation symporter family (GPH),  
19 and the ATP-binding cassette superfamily (ABC). C1A MFS transporters import  
20 monosaccharides, while the GPH, and the ABC transporters import di- and  
21 oligosaccharides (Table S16). As shown, C1A has more transporters for monosaccharides  
22 compared to di- or oligosaccharides (33 compared to 13 transporters). Most of the  
23 monosaccharide transporters were similar to fungal transporters (19 out of 33), while  
24 only a few (9 out of 33) were similar to bacterial transporters. On the other hand, almost  
25 all the di- or oligosaccharide transporters were similar to bacterial transporters (12 out of  
26 13).

## 27 **6. Peptidases in the C1A genome.**

28 The genome encodes proteases belonging to 53 families (MEROPS classification (52)) of  
29 aspartyl (19 families), cysteinyl (18 families), metallo- (19 families), seryl (11 families),  
30 and threonyl (3 families) proteases. Table S17 summarizes the results of MEROPS  
31 database comparison. The distribution of different protease families in the C1A genome  
32 is similar to other fungal genomes. Most of the proteases/peptidases are intracellular  
33 (Table S17), with the exception of metalloproteases belonging to families M23 (lyse  
34 bacterial cell walls), M28, M35, and M36.

## 35 **7. Identification and analysis of genes containing CBM modules in strain C1A.**

36 Carbohydrate-binding modules (CBM) are non-catalytic domains that are often  
37 encountered in lignocellulolytic enzymes and promote the association of the enzyme with  
38 the substrate. A total of 103 genes harboring carbohydrate-binding modules (CBM)  
39 domains belonging to 6 different CBM families were identified (Table S22). The  
40 majority (75.7%) of CBMs were members of the exclusively fungal CBM1 domain.  
41 Twenty-six genes with CBM domains were associated with GH enzymes, and 7 were  
42 associated with PL enzymes (Table S22). Within GH-CBM dual domain genes, CBM1  
43 domains were associated with several GH10 and GH11 xylanases, CBM18 with GH18  
44 chitinases, and CBM48 with GH13 amylases. No CBM domains were identified in GH  
45 genes putatively involved in cellulose metabolism in the C1A genome. No CBM2 or  
46 CBM3 domains, the prevalent CBM modules in bacterial plant biomass-degradation

1 genes and in rumen anaerobic cellulosomal bacteria, respectively, were identified in the  
2 C1A genome (Table S22).

### 3 **II. References:**

- 4 1. **Akhmanova A, Voncken FGJ, Harhangi H, Hosea KM, Vogels GD, and**  
5 **Hackstein JHP.** 1998. Cytosolic enzymes with a mitochondrial ancestry from the  
6 anaerobic chytrid *Piromyces* sp. E2. *Mol. Microbiol.* **30**: 1017-1027.
- 7 2. **Boxma B, Voncken F, Jannink S, Van Alen T, Akhmanova A, Van Weelden**  
8 **SWH, Van Hellemond JJ, Ricard G, Huynen M, Tielens AGM, and**  
9 **Hackstein JHP.** 2004. The anaerobic chytridiomycete fungus *Piromyces* sp. E2  
10 produces ethanol via pyruvate:formate lyase and an alcohol dehydrogenase E.  
11 *Mol. Microbiol.* **51**: 1389-1399.
- 12 3. **Harhangi HR, Akhmanova AS, Emmens R, van der Drift C, de Laat WTAM,**  
13 **van Dijken JP, Jetten MSM, Pronk JT, and Op den Camp HJM.** 2003.  
14 Xylose metabolism in the anaerobic fungus *Piromyces* sp. strain E2 follows the  
15 bacterial pathway. *Arch. Microbiol.* **180**: 134-141.
- 16 4. **Madhavan A, Tamalampudi S, Ushida K, Kanai D, Katahira S, Srivastava A,**  
17 **Fukuda H, Bisaria V, and Kondo A.** 2009. Xylose isomerase from polycentric  
18 fungus *Orpinomyces* gene sequencing, cloning, and expression in *Saccharomyces*  
19 *cerevisiae* for bioconversion of xylose to ethanol. *Appl. Microbiol. Biotechnol.*  
20 **82**: 1067-1078.
- 21 5. **Ball SG and Morell MK.** 2003. From bacterial glycogen to starch:  
22 Understanding the biogenesis of the plant starch granule. *Ann. Rev. Plant Biol.*  
23 **54**: 207-233.
- 24 6. **Ball S, Colleoni C, Cenci U, Raj JN, and Tirtiaux C.** 2011. The evolution of  
25 glycogen and starch metabolism in eukaryotes gives molecular clues to  
26 understand the establishment of plastid endosymbiosis. *J. Exp. Bot.* **62**: 1775-  
27 1801.
- 28 7. **Freeze HH and Elbein AD.** 2009. Chapter 4. Glycosylation precursors. *In* Ajit  
29 Varki, Richard D Cummings, Jeffrey D Esko, Hudson H Freeze, Pamela Stanley,  
30 Carolyn R Bertozzi, Gerald W Hart, and Etzler M E (ed), *Essentials of*  
31 *glycobiology*, 2nd. ed. Cold Spring Harbor Laboratory Press, Cold Spring  
32 Harbor, NY.
- 33 8. **Shears SB.** 1998. The versatility of inositol phosphates as cellular signals.  
34 *Biochim. Biophys. Acta.* **1436**: 49-67.
- 35 9. **Abuzinadah RA and Read DJ.** 1988. Amino acids as nitrogen sources for  
36 ectomycorrhizal fungi: Utilization of individual amino acids. *Trans. Brit. Mycol.*  
37 *Soc.* **91**: 473-479.
- 38 10. **Oso BA.** 1975. Utilization of amino acids as sole nitrogen sources by  
39 thermophilic fungi. *Zeitschrift für allgemeine Mikrobiologie.* **15**: 39-43.
- 40 11. **Jennison MW and Perritt AM.** 1960. Physiology of wood-rotting  
41 Basidiomycetes. III. Studies on the utilization of optical isomers of amino acids.  
42 *Mycologia.* **52**: 628-635.
- 43 12. **Whittaker SP and Cairney JWG.** 2001. Influence of amino acids on biomass  
44 production by ericoid mycorrhizal endophytes from *Woollsia pungens*  
45 (Epacridaceae). *Mycol. Res.* **105**: 105-111.

- 1 13. **Walsh CT, Garneau-Tsodikova S, and Gatto GJ.** 2005. Protein  
2 posttranslational modifications: The chemistry of proteome diversifications.  
3 *Angewandte Chemie International Edition.* **44:** 7342-7372.
- 4 14. **Hebert DN and Molinari M.** 2007. In and out of the ER: protein folding, quality  
5 control, degradation, and related human diseases. *Physiol. Rev.* **87:** 1377-1408.
- 6 15. **Helenius A, Aebi, and Markus.** 2001. Intracellular functions of N-Linked  
7 glycans. *Science.* **291:** 2364-2369.
- 8 16. **Stanley P, Schachter H, and Taniguchi N.** 2009. Chapter 8. N-glycans. *In* Ajit  
9 Varki, Richard D Cummings, Jeffrey D Esko, Hudson H Freeze, Pamela Stanley,  
10 Carolyn R Bertozzi, Gerald W Hart, and Etzler M E (ed), *Essentials of*  
11 *glycobiology*, 2nd. ed. Cold Spring Harbor Laboratory Press, Cold Spring  
12 Harbor, NY.
- 13 17. **Hang HC and Bertozzi CR.** 2005. The chemistry and biology of mucin-type O-  
14 linked glycosylation. *Bioorg. Med. Chem.* **13:** 5021-5034.
- 15 18. **Butkinaree C, Park K, and Hart GW.** 2010. O-linked  $\beta$ -N-acetylglucosamine  
16 (O-GlcNAc): Extensive crosstalk with phosphorylation to regulate signaling and  
17 transcription in response to nutrients and stress. *Biochim. Biophys. Acta.* **1800:**  
18 96-106.
- 19 19. **Zeidan Q and Hart GW.** 2010. The intersections between O-GlcNAcylation and  
20 phosphorylation: implications for multiple signaling pathways. *J. Cell Sci.* **123:**  
21 13-22.
- 22 20. **Orlean P and Menon AK.** 2007. Thematic review series: Lipid Posttranslational  
23 Modifications. GPI anchoring of protein in yeast and mammalian cells, or: how  
24 we learned to stop worrying and love glycopospholipids. *J. Lipid Res.* **48:** 993-  
25 1011.
- 26 21. **Espenshade PJ and Hughes AL.** 2007. Regulation of sterol synthesis in  
27 eukaryotes. *Ann. Rev. Genet.* **41:** 401-427.
- 28 22. **Takishita K, Chikaraishi Y, Leger M, Kim E, Yabuki A, Ohkouchi N, and**  
29 **Roger A.** 2012. Lateral transfer of tetrahymanol-synthesizing genes has allowed  
30 multiple diverse eukaryote lineages to independently adapt to environments  
31 without oxygen. *Biol. Direct.* **7:** 5.
- 32 23. **Kemp P, Lander DJ, and Orpin CG.** 1984. The lipids of the rumen fungus  
33 *Piromonas communis*. *J. Gen. Microbiol.* **130:** 27-37.
- 34 24. **Chagin VO, Stear JH, and Cardoso MC.** 2010. Organization of DNA  
35 replication. *Cold Spring Harb. Perspect. Biol.* **2:** a000737.
- 36 25. **Miyabe I, Kunkel TA, and Carr AM.** 2011. The major roles of DNA  
37 polymerases epsilon and delta at the eukaryotic replication fork are evolutionarily  
38 conserved. *PLoS Genet.* **7:** e1002407.
- 39 26. **Roeder RG.** 2003. The eukaryotic transcriptional machinery: complexities and  
40 mechanisms unforeseen. *Nat Med.* **9:** 1239-1244.
- 41 27. **Woychik NA.** 2001. RNA polymerases and the eukaryotic transcription  
42 machinery. eLS. DOI: 10.1038/npg.els.0005059.
- 43 28. **Kapp LD and Lorsch JR.** 2004. The molecular mechanics of eukaryotic  
44 translation. *Ann. Rev. Biochem.* **73:** 657-704.

- 1 29. **Tsonis PA.** 2003. Transcription in Eukaryotes, p. 104-152. (ed), Anatomy of  
2 gene regulation. A Three-dimensional Structural Analysis. Cambridge University  
3 Press, Cambridge.
- 4 30. **Fletcher DA and Mullins RD.** 2010. Cell mechanics and the cytoskeleton.  
5 *Nature.* **463:** 485-492.
- 6 31. **Wickstead B and Gull K.** 2011. The evolution of the cytoskeleton. *J. Cell Biol.*  
7 **194:** 513-525.
- 8 32. **Lodish H, Berk A, Zipursky SL, Matsudaira P, Baltimore D, and Darnell J.**  
9 2000. Chapter 19, Cell motility and shape II: microtubules and intermediate  
10 filaments., (ed), *Molecular cell biology*, 4th ed, W. H. Freeman, New York.  
11 <http://www.ncbi.nlm.nih.gov/books/NBK21646/>.
- 12 33. **Palade G.** 1975. Intracellular aspects of the process of protein synthesis. *Science.*  
13 **189:** 347-358.
- 14 34. **Rothman JE.** 1994. Mechanisms of intracellular protein transport. *Nature.* **372:**  
15 55-55.
- 16 35. **Hsu VW, Lee SY, and Yang J-S.** 2009. The evolving understanding of COPI  
17 vesicle formation. *Nat. Rev. Mol. Cell. Biol.* **10:** 360-364.
- 18 36. **Gu F, Crump CM, and Thomas G.** 2001. Trans-Golgi network sorting. *Cell.*  
19 *Mol. Life Sci.* **58:** 1067-1084.
- 20 37. **Malhotra V and Campelo F.** 2011. PKD regulates membrane fission to generate  
21 TGN to cell surface transport carriers. *Cold Spring Harb. Perspect. Biol.* **3.**
- 22 38. **Munson M and Novick P.** 2006. The exocyst defrocked, a framework of rods  
23 revealed. *Nat. Struct. Mol. Biol.* **13:** 577-581.
- 24 39. **Doherty GJ and McMahon HT.** 2009. Mechanisms of endocytosis. *Ann. Rev.*  
25 *Biochem.* **78:** 857-902.
- 26 40. **Fader CM and Colombo MI.** 2008. Autophagy and multivesicular bodies: two  
27 closely related partners. *Cell Death Differ.* **16:** 70-78.
- 28 41. **Ghosh P, Dahms NM, and Kornfeld S.** 2003. Mannose 6-phosphate receptors:  
29 new twists in the tale. *Nat. Rev. Mol. Cell. Biol.* **4:** 202-213.
- 30 42. **Saftig P and Klumperman J.** 2009. Lysosome biogenesis and lysosomal  
31 membrane proteins: trafficking meets function. *Nat. Rev. Mol. Cell. Biol.* **10:**  
32 623-635.
- 33 43. **Whyte JRC and Munro S.** 2002. Vesicle tethering complexes in membrane  
34 traffic. *J. Cell Sci.* **115:** 2627-2637.
- 35 44. **Schmitt HD and Jahn R.** 2009. A Tethering Complex Recruits SNAREs and  
36 Grabs Vesicles. *Cell.* **139:** 1053-1055.
- 37 45. **Ha Y.** 2007. Structural principles of intramembrane proteases. *Curr. Opin. Struct.*  
38 *Biol.* **17:** 405-411.
- 39 46. **Freeman M.** 2008. Rhomboid proteases and their biological functions. *Ann. Rev.*  
40 *Genet.* **42:** 191-210.
- 41 47. **Wolfe MS.** 2006. The  $\gamma$ -secretase complex: a membrane-embedded proteolytic  
42 ensemble. *Biochemistry.* **45:** 7931-7939.
- 43 48. **Iwatsubo T.** 2004. The  $\text{A}\beta$ -secretase complex: machinery for intramembrane  
44 proteolysis. *Current Opinion in Neurobiology.* **14:** 379-383.
- 45 49. **Small D, Klaver D, and Foa L.** 2010. Presenilins and the gamma-secretase: still  
46 a complex problem. *Mol. Brain.* **3:** 7.

- 1 50. **King N, Westbrook MJ, Young SL, Kuo A, Abedin M, Chapman J,**  
2 **Fairclough S, Hellsten U, Isogai Y, Letunic I, Marr M, Pincus D, Putnam N,**  
3 **Rokas A, Wright KJ, Zuzow R, Dirks W, Good M, Goodstein D, Lemons D,**  
4 **Li W, Lyons JB, Morris A, Nichols S, Richter DJ, Salamov A, Sequencing**  
5 **JGI, Bork P, Lim WA, Manning G, Miller WT, McGinnis W, Shapiro H,**  
6 **Tjian R, Grigoriev IV, and Rokhsar D.** 2008. The genome of the  
7 choanoflagellate *Monosiga brevicollis* and the origin of metazoans. *Nature*. **451**:  
8 783-788.
- 9 51. **Ruiz-Trillo I, Lane CE, Archibald JM, and Roger AJ.** 2006. Insights into the  
10 evolutionary origin and genome architecture of the unicellular Opisthokonts  
11 *Capsaspora owczarzaki* and *Sphaeroforma arctica*. *J. Euk. Microbiol.* **53**: 379-  
12 384.
- 13 52. **Rawlings ND, Barrett AJ, and Bateman A.** 2012. MEROPS: the database of  
14 proteolytic enzymes, their substrates and inhibitors. *Nucleic Acids Res.* **40**: D343-  
15 D350.
- 16 53. **Hunter S, Jones P, Mitchell A, Apweiler R, Attwood TK, Bateman A,**  
17 **Bernard T, Binns D, Bork P, Burge S, de Castro E, Coggill P, Corbett M, Das**  
18 **U, Daugherty L, Duquenne L, Finn RD, Fraser M, Gough J, Haft D, Hulo N,**  
19 **Kahn D, Kelly E, Letunic I, Lonsdale D, Lopez R, Madera M, Maslen J,**  
20 **McAnulla C, McDowall J, McMenamin C, Mi H, Mutowo-Muellenet P,**  
21 **Mulder N, Natale D, Orengo C, Pesseat S, Punta M, Quinn AF, Rivoire C,**  
22 **Sangrador-Vegas A, Selengut JD, Sigrist CJA, Scheremetjew M, Tate J,**  
23 **Thimmajanthan M, Thomas PD, Wu CH, Yeats C, and Yong S-Y.** 2012.  
24 InterPro in 2011: new developments in the family and domain prediction  
25 database. *Nucleic Acids Res.* **40**: D306-D312.
- 26 54. **Kinch LN, Ginalski K, and Grishin NV.** 2006. Site-2 protease regulated  
27 intramembrane proteolysis: Sequence homologs suggest an ancient signaling  
28 cascade. *Protein Sci.* **15**: 84-93.
- 29 55. **Rawlings ND, Morton FR, Kok CY, Kong J, and Barrett AJ.** 2008. MEROPS:  
30 the peptidase database. *Nucleic Acids Research.* **36**: D320-D325.
- 31 56. **Epstein L and Nicholson RL.** 2006. Adhesion and adhesives of Fungi and  
32 Oomycetes, p. 41-62. *In* Smith A M and Callow J A (ed), *Biological Adhesives*.  
33 Springer-Verlag, Berlin, Heidelberg.
- 34 57. **Wozniak MA, Modzelewska K, Kwong L, and Keely PJ.** 2004. Focal adhesion  
35 regulation of cell behavior. *Biochim. Biophys. Acta.* **1692**: 103-119.
- 36 58. **Sebé-Pedrós A, Roger AJ, Lang FB, King N, and Ruiz-Trillo I.** 2010. Ancient  
37 origin of the integrin-mediated adhesion and signaling machinery. *Proc. Natl.*  
38 *Acad. Sci.* **107**: 10142-10147.
- 39 59. **Parsons JT, Horwitz AR, and Schwartz MA.** 2010. Cell adhesion: integrating  
40 cytoskeletal dynamics and cellular tension. *Nat. Rev. Mol. Cell. Biol.* **11**: 633-  
41 643.
- 42 60. **Mitchison TJ and Mitchison HM.** 2010. Cell biology: How cilia beat. *Nature*.  
43 **463**: 308-309.
- 44 61. **Fritz-Laylin LK and Cande WZ.** 2010. Ancestral centriole and flagella proteins  
45 identified by analysis of *Naegleria* differentiation. *J. Cell Sci.* **123**: 4024-4031.

- 1 62. **Kobayashi T and Dynlacht BD.** 2011. Regulating the transition from centriole to  
2 basal body. *J. Cell Biol.* **193**: 435-444.
- 3 63. **Taschner M, Bhogaraju S, and Lorentzen E.** 2012. Architecture and function  
4 of IFT complex proteins in ciliogenesis. *Differentiation.* **83**: S12-S22.
- 5 64. **Ivanov D, Emonet C, Foata F, Affolter M, Delley M, Fisseha M, Blum-  
6 Sperisen S, Kochhar S, and Arigoni F.** 2006. A serpin from the gut bacterium  
7 *Bifidobacterium longum* inhibits eukaryotic elastase-like serine proteases. *J. Biol.*  
8 *Chem.* **281**: 17246-17252.
- 9 65. **Brock FM, Forsberg CW, and Buchanan-Smith JG.** 1982. Proteolytic activity  
10 of rumen microorganisms and effects of proteinase inhibitors. *Appl. Environ.*  
11 *Microbiol.* **44**: 561-569.
- 12 66. **Steenbakkers PJM, Irving JA, Harhangi HR, Swinkels WJC, Akhmanova A,  
13 Dijkerman R, Jetten MSM, van der Drift C, Whisstock JC, and Op den  
14 Camp HJM.** 2008. A serpin in the cellulosome of the anaerobic fungus  
15 *Piromyces* sp. strain E2. *Mycol. Res.* **112**: 999-1006.
- 16 67. **Forsberg CW, Lovelock LK, Krumholz L, and Buchanan-Smith JG.** 1984.  
17 Protease activities of rumen protozoa. *Appl. Environ. Microbiol.* **47**: 101-110.
- 18 68. **Müller M, Mentel M, van Hellemond JJ, Henze K, Woehle C, Gould SB, Yu  
19 R-Y, van der Giezen M, Tielens AGM, and Martin WF.** 2012. Biochemistry  
20 and evolution of anaerobic energy metabolism in eukaryotes. *Microbiol. Mol.*  
21 *Biol. Rev.* **76**: 444-495.
- 22 69. **Mentel M and Martin W.** 2008. Energy metabolism among eukaryotic  
23 anaerobes in light of Proterozoic ocean chemistry. *Phil. Trans. R. Soc. B.* **363**:  
24 2717-2729.
- 25 70. **Tachezy J and Doležal P.** 2007. Iron-Sulfur proteins and iron-sulfur cluster  
26 assembly in organisms with hydrogenosomes and mitosomes., p. 105-134. *In*  
27 *Martin W F and Müller M (ed), Origin of Mitochondria and Hydrogenosomes.*  
28 Springer-Verlag, Berlin Heidelberg.
- 29 71. **Lithgow T and Schneider A.** 2010. Evolution of macromolecular import  
30 pathways in mitochondria, hydrogenosomes and mitosomes. *Phil. Trans. R. Soc.*  
31 *B.* **365**: 799-817.
- 32 72. **Chacinska A, Koehler CM, Milenkovic D, Lithgow T, and Pfanner N.** 2009.  
33 Importing mitochondrial proteins: machineries and mechanisms. *Cell.* **138**: 628-  
34 644.
- 35 73. **Neupert W and Herrmann JM.** 2007. Translocation of proteins into  
36 mitochondria. *Ann. Rev. Biochem.* **76**: 723-749.
- 37 74. **Rada P, Doležal P, Jedelský PL, Bursac D, Perry AJ, Šedinová M, Smíšková  
38 K, Novotný M, Beltrán NC, Hrdý I, Lithgow T, and Tachezy J.** 2011. The  
39 core components of organelle biogenesis and membrane transport in the  
40 hydrogenosomes of *Trichomonas vaginalis*. *PLoS ONE.* **6**: e24428.
- 41 75. **Hibbett DS, Binder M, Bischoff JF, Blackwell M, Cannon PE, Eriksson OE,  
42 Huhndorf S, James T, Kirk PM, Lücking R, Thorsten LH, Lutzoni F,  
43 Matheny PB, McLaughlin DJ, Powell MJ, Redhead S, Schoch C, Spatafora  
44 JW, Stalpers JA, Vilgalys R, Aime AM, Aptroot A, Bauer R, D.  
45 Begerow D, Benny GL, Castlebury LA, Crous PC, Dai Y-C, Gams  
46 W, Geiser D, Griffith GW, Guéidan C, Hawksworth DL, Hestmark G,**

- 1 **Hosaka K, Humber RA, Hyde KD, Ironside JE, Kiljalg U, Kurtzman CP,**  
2 **Larsson K-H, Lichtwardt R, Longcore J, Miadlikowska J, Miller A,**  
3 **Moncalvo J-M, Mozley-Standridge S, Oberwinkler F, E. Parmasto E, V.**  
4 **Reeb V, Rogers JD, Roux C, Ryvarden L, Sampaio J, Sch AF, J. Sugiyama,**  
5 **Thorn RG, Tibell L, Untereiner WA, Walker C, Wang Z, Weir A, Weiss M,**  
6 **White M, Winka K, Yao Y-J, and Zhang N.** 2007. A higher-level phylogenetic  
7 classification of the Fungi. *Mycol. Res.* **111**: 509-547.
- 8 76. **Lill R and Mühlenhoff U.** 2008. Maturation of iron-sulfur proteins in  
9 eukaryotes: mechanisms, connected processes, and diseases. *Ann. Rev. Biochem.*  
10 **77**: 669-700.
- 11 77. **Lill R and Mühlenhoff U.** 2006. Iron-sulfur protein biogenesis in eukaryotes:  
12 components and mechanisms. *Ann. Rev. Cell Develop. Biol.* **22**: 457-486.
- 13 78. **Sharma AK, Pallesen LJ, Spang RJ, and Walden WE.** 2010. Cytosolic iron-  
14 sulfur cluster assembly (CIA) system: factors, mechanism, and relevance to  
15 cellular iron regulation. *J. Biol. Chem.* **285**: 26745-26751.
- 16 79. **Saier MH, Yen MR, Noto K, Tamang DG, and Elkan C.** 2009. The  
17 Transporter Classification Database: recent advances. *Nucleic Acids Res.* **37**:  
18 D274-D278.
- 19 80. **Stamatakis A.** 2006. RAxML-VI-HPC: maximum likelihood-based phylogenetic  
20 analyses with thousands of taxa and mixed models. *Bioinformatics.* **22**: 2688-  
21 2690.
- 22 81. **Harhangi HR, Akhmanova A, Steenbakkers PJM, Jetten MSM, van der**  
23 **Drift C, and Op den Camp HJM.** 2003. Genomic DNA analysis of genes  
24 encoding (hemi-)cellulolytic enzymes of the anaerobic fungus *Piromyces* sp. E2.  
25 *Gene.* **314**: 73-80.
- 26 82. **Li X-L, Ljungdahl L, Ximenes E, Chen H, Felix C, Cotta M, and Dien B.**  
27 2004. Properties of a recombinant  $\beta$ -glucosidase from polycentric anaerobic  
28 fungus *Orpinomyces* PC-2 and its application for cellulose hydrolysis. *Appl.*  
29 *Biochem. Biotechnol.* **113**: 233-250.
- 30 83. **Harhangi HR, Steenbakkers PJM, Akhmanova A, Jetten MSM, van der**  
31 **Drift C, and Op den Camp HJM.** 2002. A highly expressed family 1  $\beta$ -  
32 glucosidase with transglycosylation capacity from the anaerobic fungus  
33 *Piromyces* sp. E2. *Biochim. Biophys. Acta.* **1574**: 293-303.
- 34 84. **Chen H-L, Chen Y-C, Lu M-Y, Chang J-J, Wang H-T, Ke H-M, Wang T-Y,**  
35 **Ruan S-K, Wang T-Y, Hung K-Y, Cho H-Y, Lin W-T, Shih M-C, and Li W-**  
36 **H.** 2012. A highly efficient beta-glucosidase from the buffalo rumen fungus  
37 *Neocallimastix patriciarum* W5. *Biotechnol. Biofuels.* **5**: 24.
- 38 85. **Wang T-Y, Chen H-L, Lu M-Y, Chen Y-C, Sung H-M, Mao C-T, Cho H-Y,**  
39 **Ke H-M, Hwa T-Y, Ruan S-K, Hung K-Y, Chen C-K, Li J-Y, Wu Y-C, Chen**  
40 **Y-H, Chou S-P, Tsai Y-W, Chu T-C, Shih C-C, Li W-H, and Shih M-C.** 2011.  
41 Functional characterization of cellulases identified from the cow rumen fungus  
42 *Neocallimastix patriciarum* W5 by transcriptomic and secretomic analyses.  
43 *Biotechnology for Biofuels.* **4**: 24.
- 44 86. **Steenbakkers PJM, Harhangi HR, Bosscher MW, van der Hooft MMC,**  
45 **Keltjens JT, van der Drift C, Vogels GD, and op den Camp HJM.** 2003. Beta-

- 1 glucosidase in cellulosome of the anaerobic fungus *Piromyces* sp. strain E2 is a  
2 family 3 glycoside hydrolase. *Biochem. J.* **370**: 963-970.
- 3 87. **Xue G-P, Gobius KS, and Orpin CG.** 1992. A novel polysaccharide hydrolase  
4 cDNA (celD) from *Neocallimastix patriciarum* encoding three multi-functional  
5 catalytic domains with high endoglucanase, cellobiohydrolase and xylanase  
6 activities. *J. Gen. Microbiol.* **138**: 2397-2403.
- 7 88. **Steenbakkens PJ, Li XL, Ximenes EA, Arts JG, Chen H, Ljungdahl LG, and  
8 Camp HJOD.** 2001. Noncatalytic docking domains of cellulosomes of anaerobic  
9 fungi. *J. Bacteriol.* **183**: 5325-5333.
- 10 89. **Zhou L, Xue GP, Orpin CG, Black GW, Gilbert HJ, and Hazlewood GP.**  
11 1994. Intronless celB from the anaerobic fungus *Neocallimastix patriciarum*  
12 encodes a modular family A endoglucanase. *Biochem. J.* **297**: 359-364.
- 13 90. **Qiu X, Selinger B, Yanke LJ, and Cheng KJ.** 2000. Isolation and analysis of  
14 two cellulase cDNAs from *Orpinomyces joyonii*. *Gene.* **245**: 119-126.
- 15 91. **Fujino Y, Ogata K, Nagamine T, and Ushida K.** 1998. Cloning, sequencing,  
16 and expression of an endoglucanase gene from the rumen anaerobic fungus  
17 *Neocallimastix frontalis* MCH3. *Biosci. Biotechnol. Biochem.* **62**: 1795-1798.
- 18 92. **Tsai C-F, Qiu X, and Liu J-H.** 2003. A comparative analysis of two cDNA  
19 clones of the cellulase gene family from anaerobic fungus *Piromyces rhizinflata*.  
20 *Anaerobe.* **9**: 131-140.
- 21 93. **Chen H, Li X-L, Blum D, Ximenes E, and Ljungdahl L.** 2003. CelF of  
22 *Orpinomyces* PC-2 has an intron and encodes a cellulase (CelF) containing a  
23 carbohydrate-binding module. *Appl. Biochem. Biotechnol.* **108**: 775-785.
- 24 94. **Harhangi HR, Frelove ACJ, Ubhayasekera W, van Dinther M,  
25 Steenbakkens PJM, Akhmanova A, van der Drift C, Jetten MSM, Mowbray  
26 SL, Gilbert HJ, and Op den Camp HJM.** 2003. Cel6A, a major exoglucanase  
27 from the cellulosome of the anaerobic fungi *Piromyces* sp. E2 and *Piromyces*  
28 *equi*. *Biochim. Biophys. Acta.* **1628**: 30-39.
- 29 95. **Steenbakkens PJM, Ubhayasekera W, Goossen HJAM, van Lierop EMHM,  
30 van der Drift C, Vogels GD, Mowbray SL, and Op den Camp HJM.** 2002. An  
31 intron-containing glycoside hydrolase family 9 cellulase gene encodes the  
32 dominant 90 kDa component of the cellulosome of the anaerobic fungus  
33 *Piromyces* sp. strain E2. *Biochem. J.* **365**: 193-204.
- 34 96. **Black GW, Hazlewood GP, Xue GP, Orpin CG, and Gilbert HJ.** 1994.  
35 Xylanase B from *Neocallimastix patriciarum* contains a non-catalytic 455-residue  
36 linker sequence comprised of 57 repeats of an octapeptide. *Biochem. J.* **299**: 381-  
37 387.
- 38 97. **Pai C-K, Wu Z-Y, Chen M-J, Zeng Y-F, Chen J-W, Duan C-H, Li M-L, and  
39 Liu J-R.** 2010. Molecular cloning and characterization of a bifunctional  
40 xylanolytic enzyme from *Neocallimastix patriciarum*. *Appl. Microbiol.*  
41 *Biotechnol.* **85**: 1451-1462.
- 42 98. **Liu J-H, Selinger BL, Tsai C-F, and Cheng K-J.** 1999. Characterization of a  
43 *Neocallimastix patriciarum* xylanase gene and its product. *Can. J. Microbiol.* **45**:  
44 970-974.
- 45 99. **Fanutti C, Ponyi T, Black GW, Hazlewood GP, and Gilbert HJ.** 1995. The  
46 conserved noncatalytic 40-residue sequence in cellulases and hemicellulases from



- 1 anaerobic fungi functions as a protein docking domain. *J. Biol. Chem.* **270**:  
2 29314-29322.
- 3 100. **Durand R, Rascle C, and Fèvre M.** 1996. Molecular characterization of xyn3, a  
4 member of the endoxylanase multigene family of the rumen anaerobic fungus  
5 *Neocallimastix frontalis*. *Curr. Genet.* **30**: 531-540.
- 6 101. **Eberhardt RY, Gilbert HJ, and Hazlewood GP.** 2000. Primary sequence and  
7 enzymic properties of two modular endoglucanases, Cel5A and Cel45A, from the  
8 anaerobic fungus *Piromyces equi*. *Microbiology.* **146**: 1999-2008.
- 9 102. **Steenbakkens P, Freelove A, Van Cranenbroek B, Sweegers B, Harhangi H,**  
10 **Vogels G, Hazlewood G, Gilbert H, and Op den Camp H.** 2002. The major  
11 component of the cellulosomes of anaerobic fungi from the genus *Piromyces* is a  
12 family 48 glycoside hydrolase. *DNA seq.* **13**: 313-320.
- 13 103. **Qi M, Wang P, Selinger LB, Yanke LJ, Forster RJ, and McAllister TA.** 2011.  
14 Isolation and characterization of a ferulic acid esterase (Fae1A) from the rumen  
15 fungus *Anaeromyces mucronatus*. *J. Appl. Microbiol.* **110**: 1341-1350.

16

17

18

1 **III. Supplementary Figures:**  
2 **Figure S1.** (A) *Orpinomyces* sp. strain C1A on anaerobic agar roll tubes. (B) Phase  
3 contrast micrograph displaying polycentric growth of strain C1A. (C) Strain C1A  
4 growing on and colonizing switchgrass (1), compared to uninoculated control (2) (D)  
5 Distance dendrogram based on ITS1-2 region highlighting the phylogenetic affiliation of  
6 strain C1A within the Neocallimastigomycota. The tree was constructed using Neighbor  
7 Joining algorithm with Jukes-Cantor corrections. Bootstrap values shown are based on  
8 1000 replicates. (E) High order phylogenetic relationship between  
9 Neocallimastigomycota C1A genome and selected basal and Dikarya fungal genomes.  
10 The maximum likelihood tree was constructed in RaxML (80) using a concatenated set of  
11 42 protein-coding genes. The alignment was comprised of 24349 total trimmed amino  
12 acid residues. The tree was constructed using BLOSUM62 model with fixed base  
13 frequencies, proportion of invariable sites = 0.07, and  $\alpha$  parameter = 1.27. Bootstrap  
14 values (in percentages) are based on 1000 replicates and are shown for branches with  
15 more than 50% bootstrap support.

1

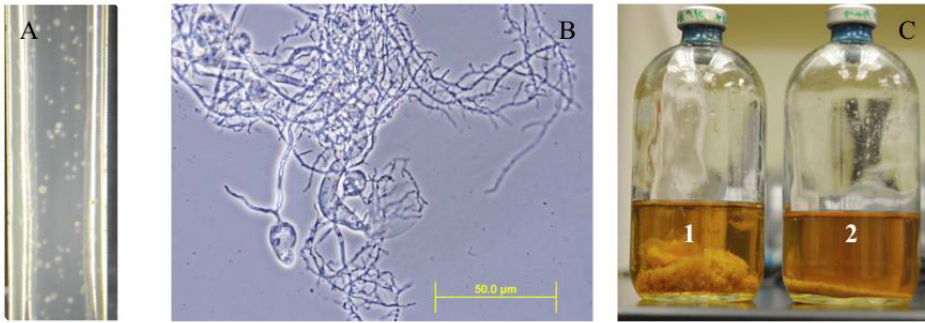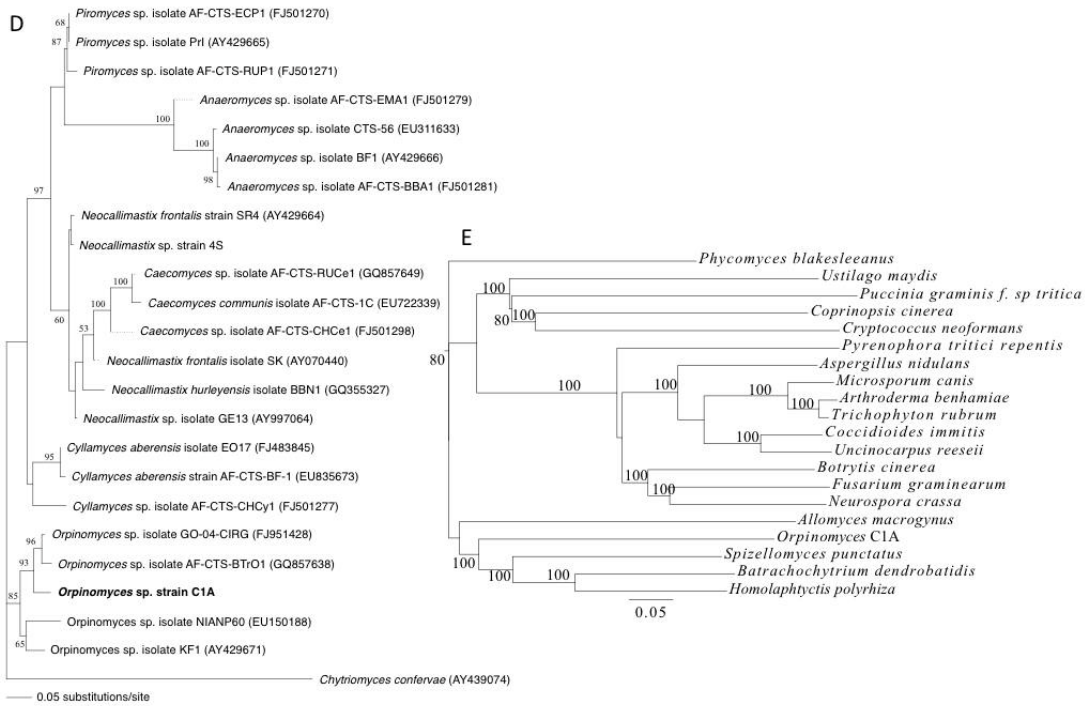

- 1 **Figure S2.** Comparison of total number of introns (A), intron density (B), and introns per  
2 gene (C) between the C1A (circled) and 120 different fungal genomes (90 Ascomycota,  
3 16 Basidiomycota, 7 Early-diverging fungal lineages, and 7 Microsporidiae).

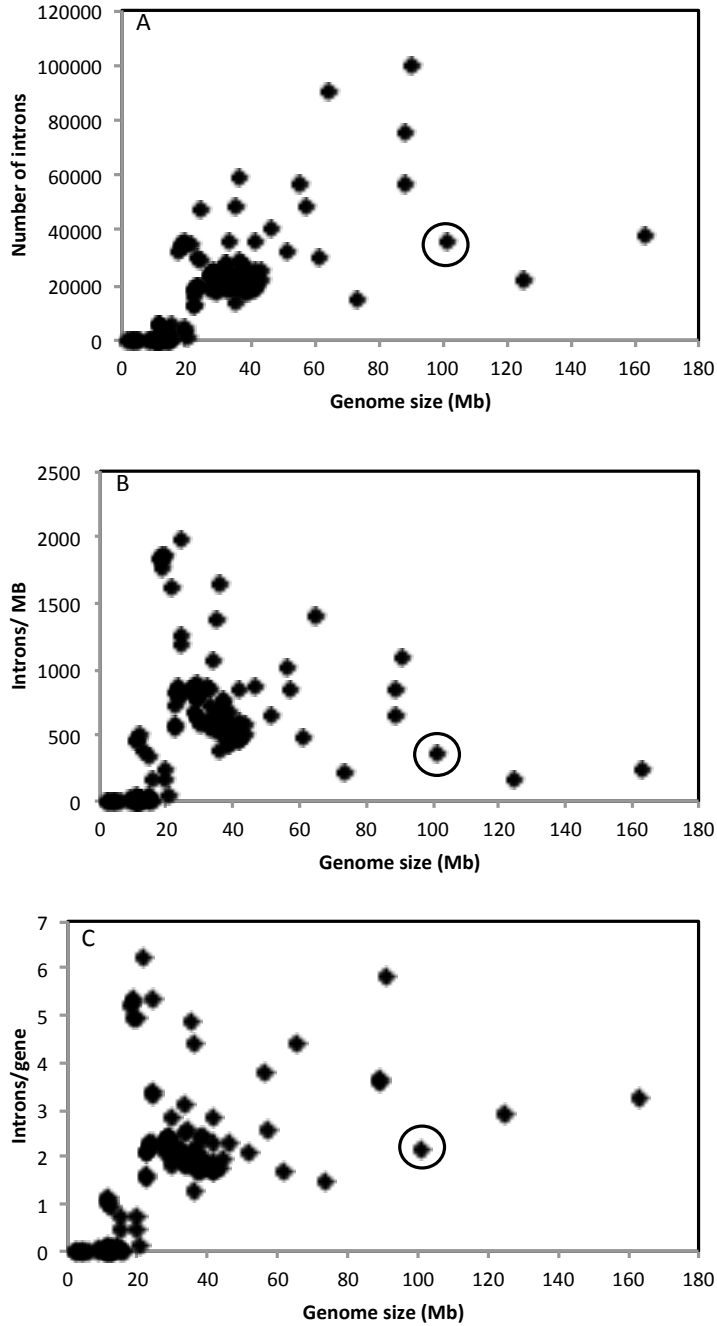

4

5

1 **Figure S3.** Suggested N-glycan oligosaccharide structure of strain C1A.

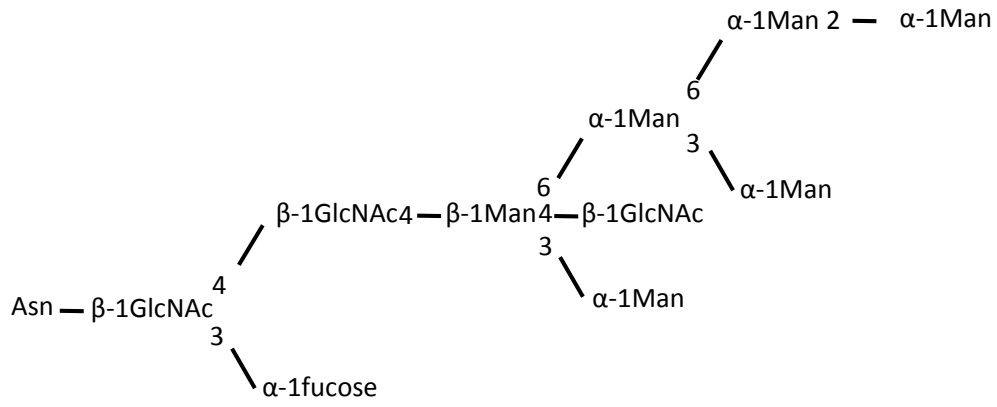

2

3

1 **Figure S4.** Intracellular protein trafficking in strain C1A. Proteins that are not destined  
 2 for secretion are synthesized on free ribosomes (brown arrows). Those proteins could  
 3 either remain in the cytosol (cytosolic proteins, route 1), transport to the nucleus (nuclear  
 4 proteins, route 2), or could be imported into the hydrogenosome (hydrogenosomal  
 5 proteins, route 3), or peroxisome (peroxisomal proteins, route 4). On the other hand,  
 6 proteins synthesized on membrane-bound ribosomes of the rough endoplasmic reticulum  
 7 (RER) could either be secreted (secretory pathway, blue arrows), or enter the endosomal  
 8 system and eventually be degraded in the lysosome (endosomal pathway, green arrows).  
 9 More detailed explanation is presented in the supplementary text. Coat protein  
 10 components, SNARE components, and vesicle tethering complexes are indicated where  
 11 appropriate. EE: early endosome, ER: endoplasmic reticulum, H: hydrogenosome, L:  
 12 lysosome, LE: late endosome, MVB: multivesicular bodies, P: peroxisome, RE: recycling  
 13 endosome, TGN: trans-Golgi network.

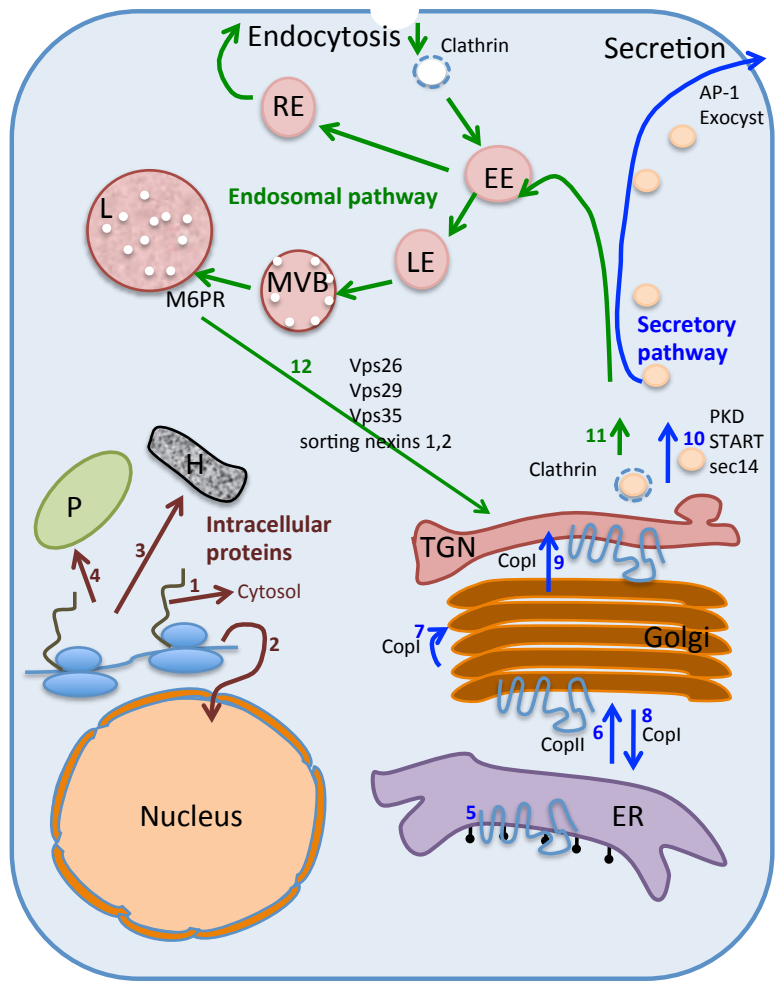

14

15

1 **Figure S5.** Maximum-likelihood dendograms showing the phylogenetic affiliation of  
 2 selected C1A plant biomass-degradation enzymes belonging to families (A) GH5, (B)  
 3 GH6, (C) GH8, (D) GH9, (E) GH10, (F) GH11, (G) GH26, (H) GH43, (I) GH45, (J)  
 4 GH48, and (K) GH67. The trees were constructed in RaxML (80) using BLOSUM62  
 5 model with fixed base frequencies. Bootstrap values (in percentages) are based on 1000  
 6 replicates and are shown for branches with more than 50% bootstrap support.

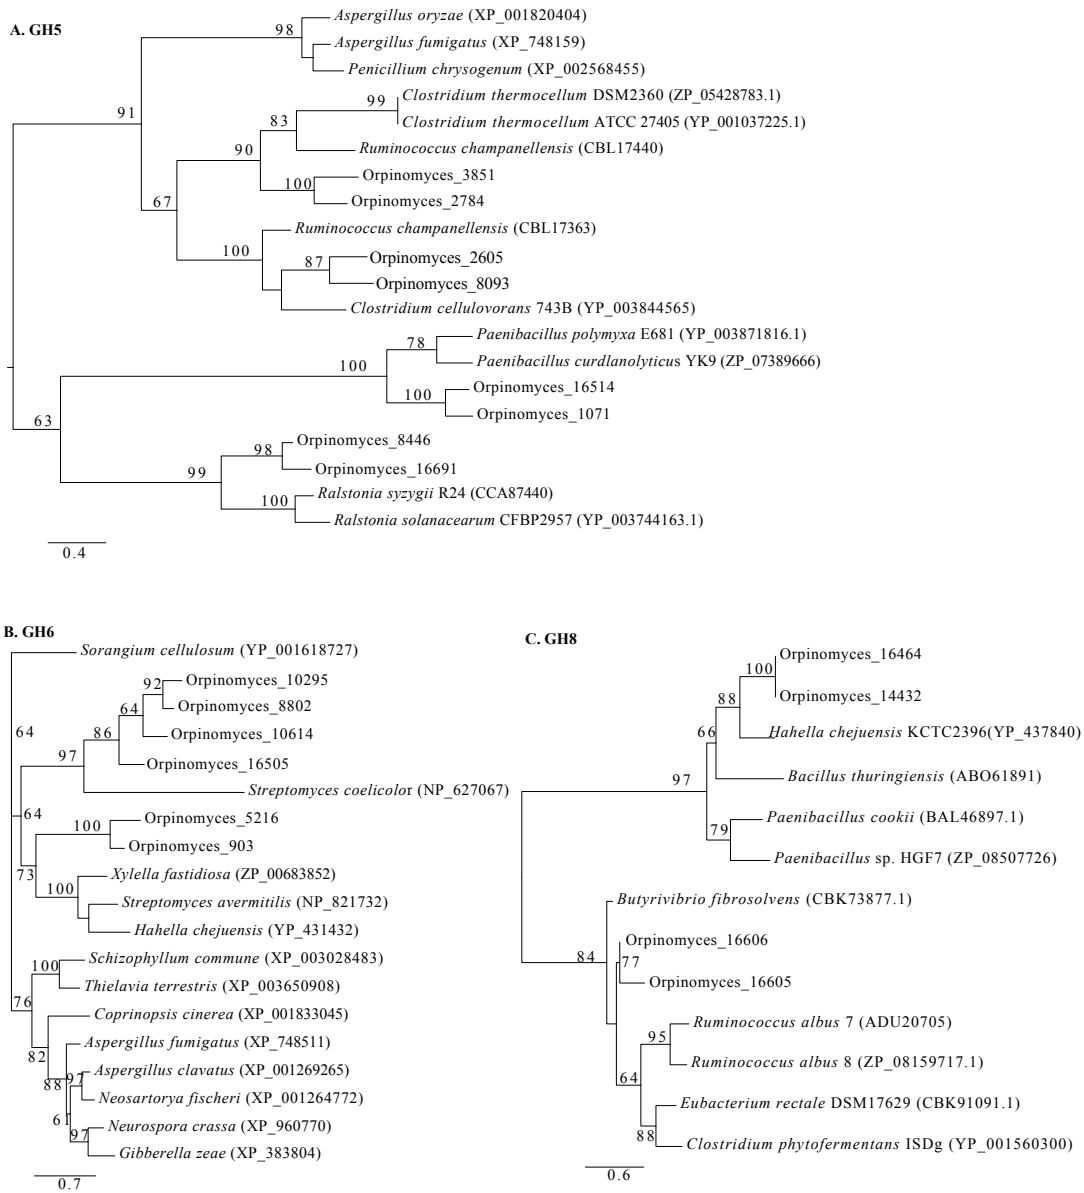

7

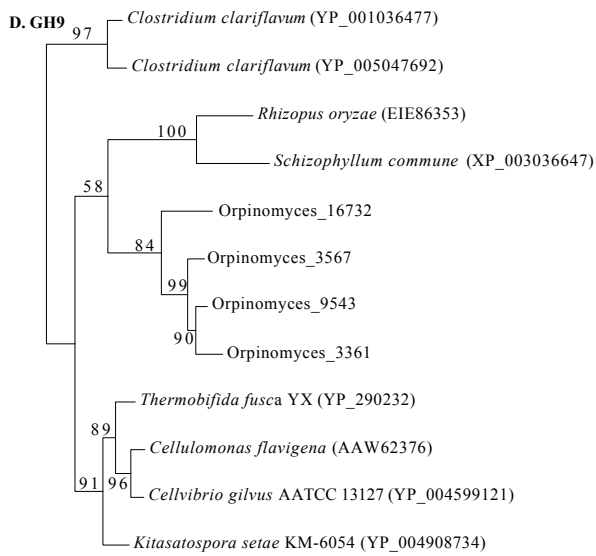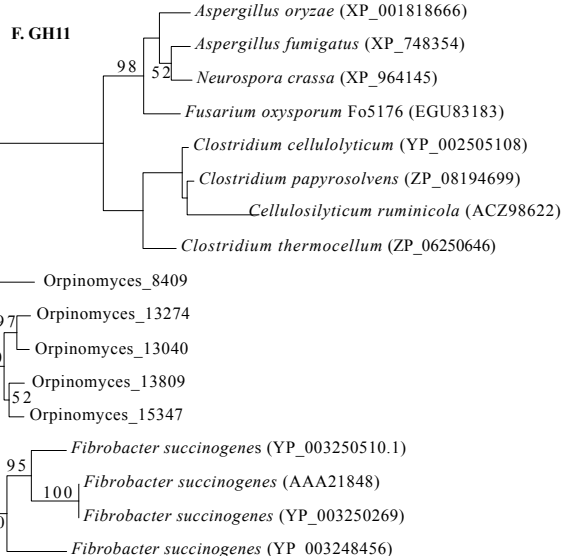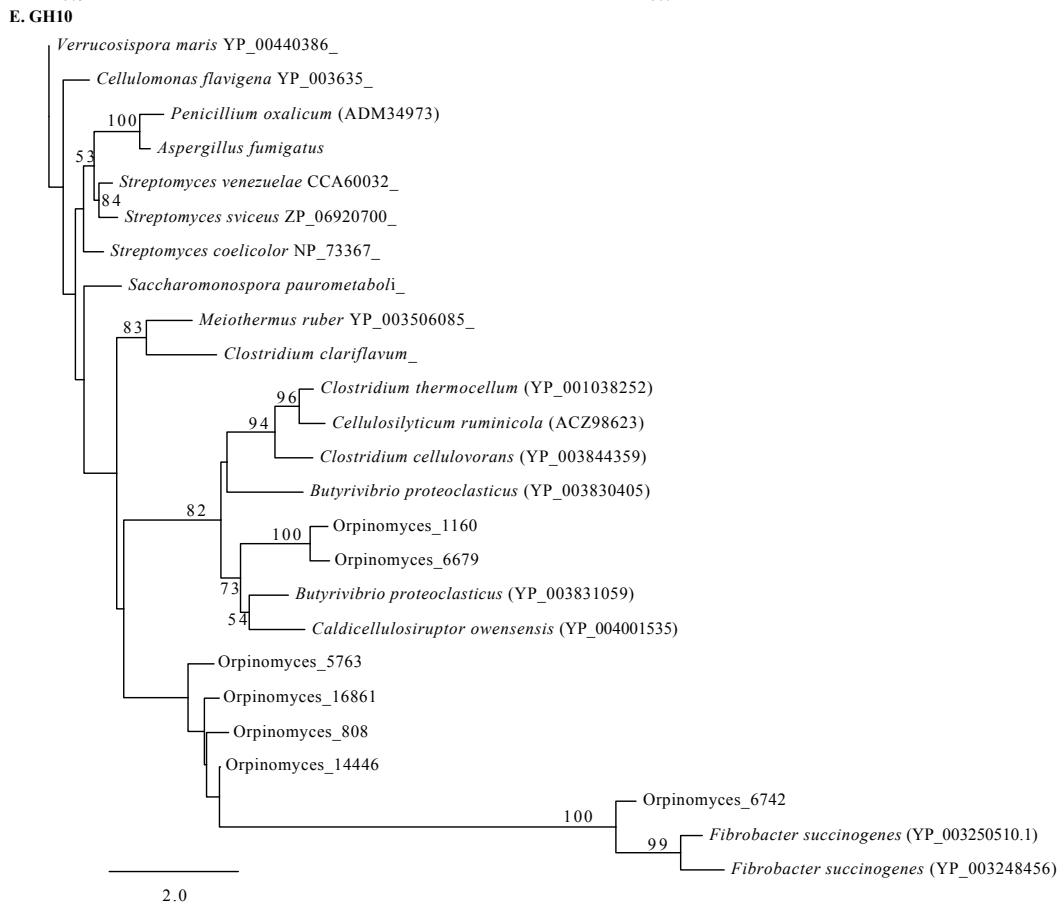



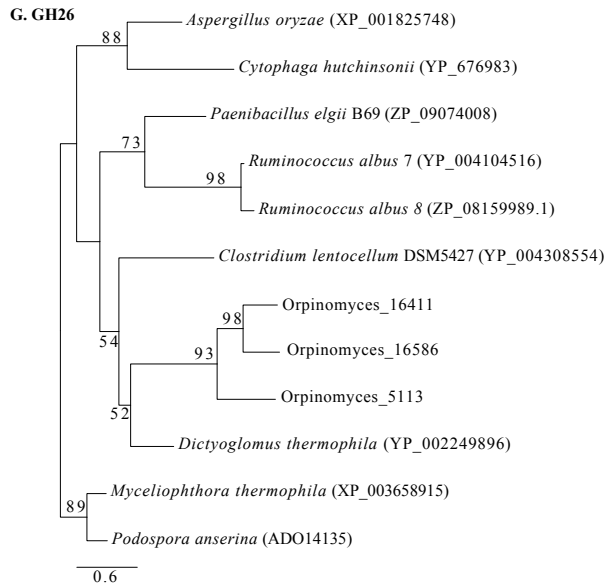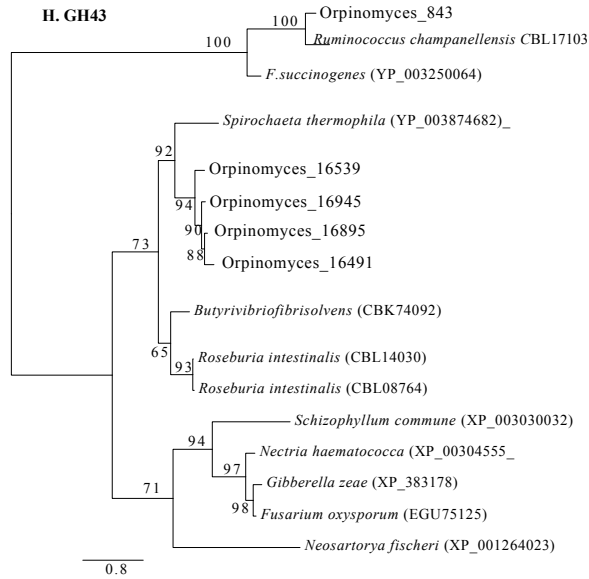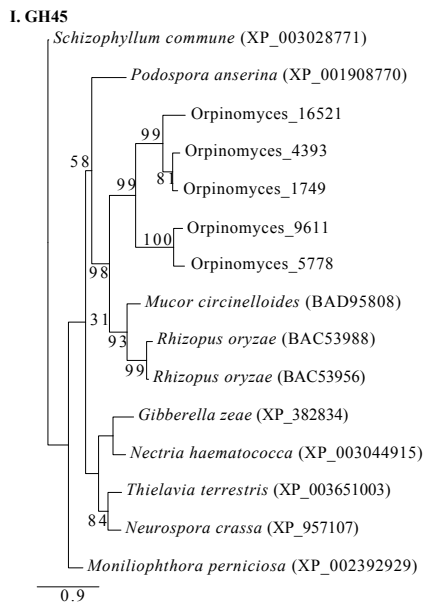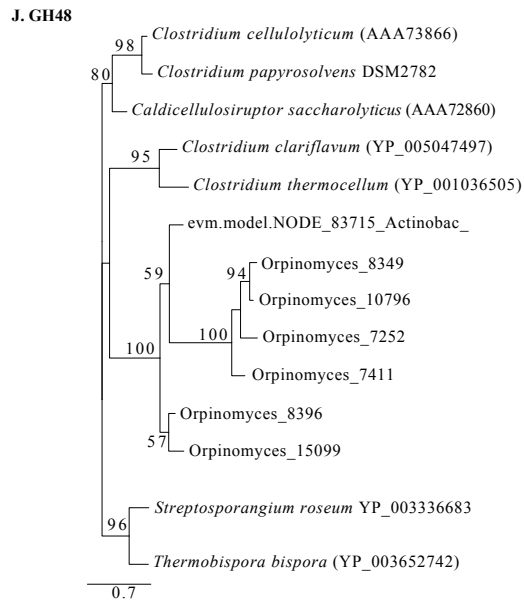

**K. GH67**

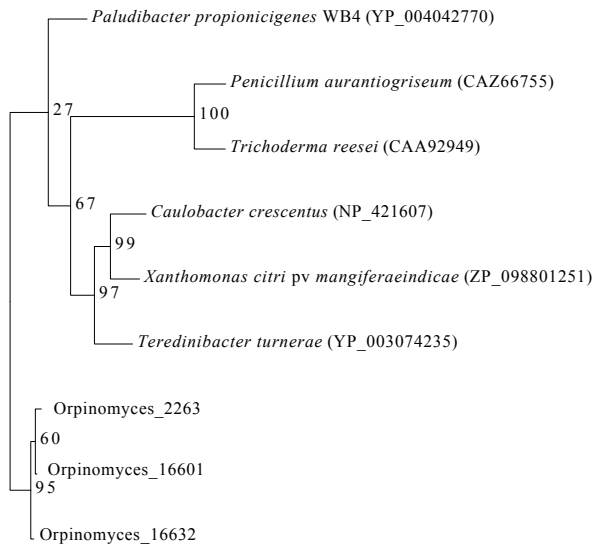

0.6

- 1 **Figure S6.** Transcription levels of genes belonging to various GH families in cellulose
- 2 (blue)- versus cellobiose (red)-grown cultures. Transcription levels are expressed as
- 3 absolute transcripts per million (TPM) in (A), and as normalized TPM relative to a suite
- 4 of glycolytic genes in (B).

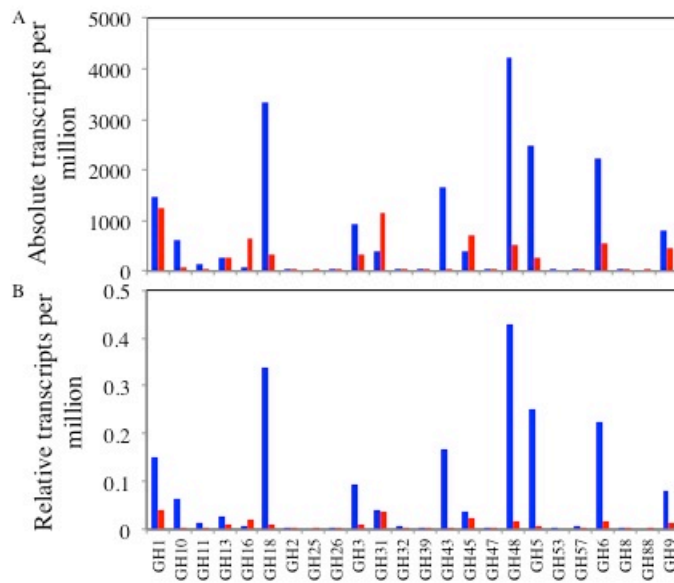

1 **Figure S7.** Crystalline cellulose and xylan utilization by *Orpinomyces* strain C1A. (A)  
 2 Cellulose loss (○) and lactate (◇), formate (□), acetate (△), and ethanol (X) production  
 3 in microcosms that were amended with avicel and strain C1A. (B) Formate (◇), Lactate  
 4 (□), acetate (△), and ethanol (X) production in microcosms that were amended with  
 5 xylan and strain C1A.

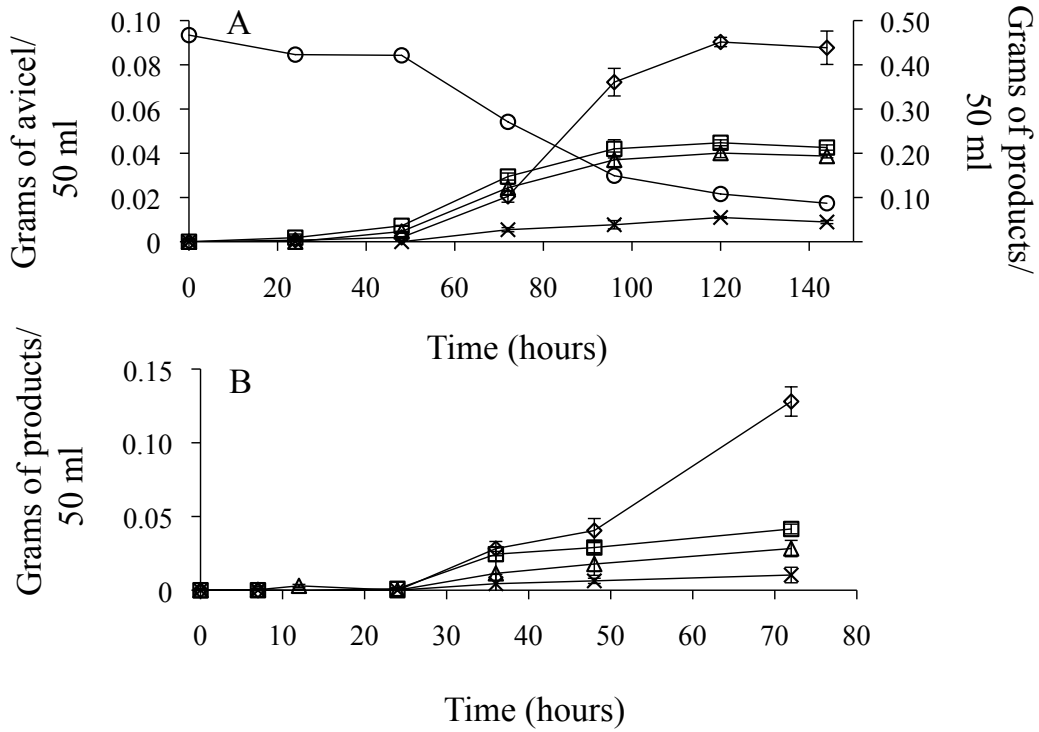

6

7

1 **Figure S8.** Grams of dry weight ( $\diamond$ ), cellulose ( $\square$ ), hemicellulose ( $\triangle$ ), and lignin (X)  
 2 lost in microcosms that contained untreated (A), sodium hydroxide-treated (B), acid-  
 3 treated (C), and hydrothermolysis-treated (D) switchgrass.

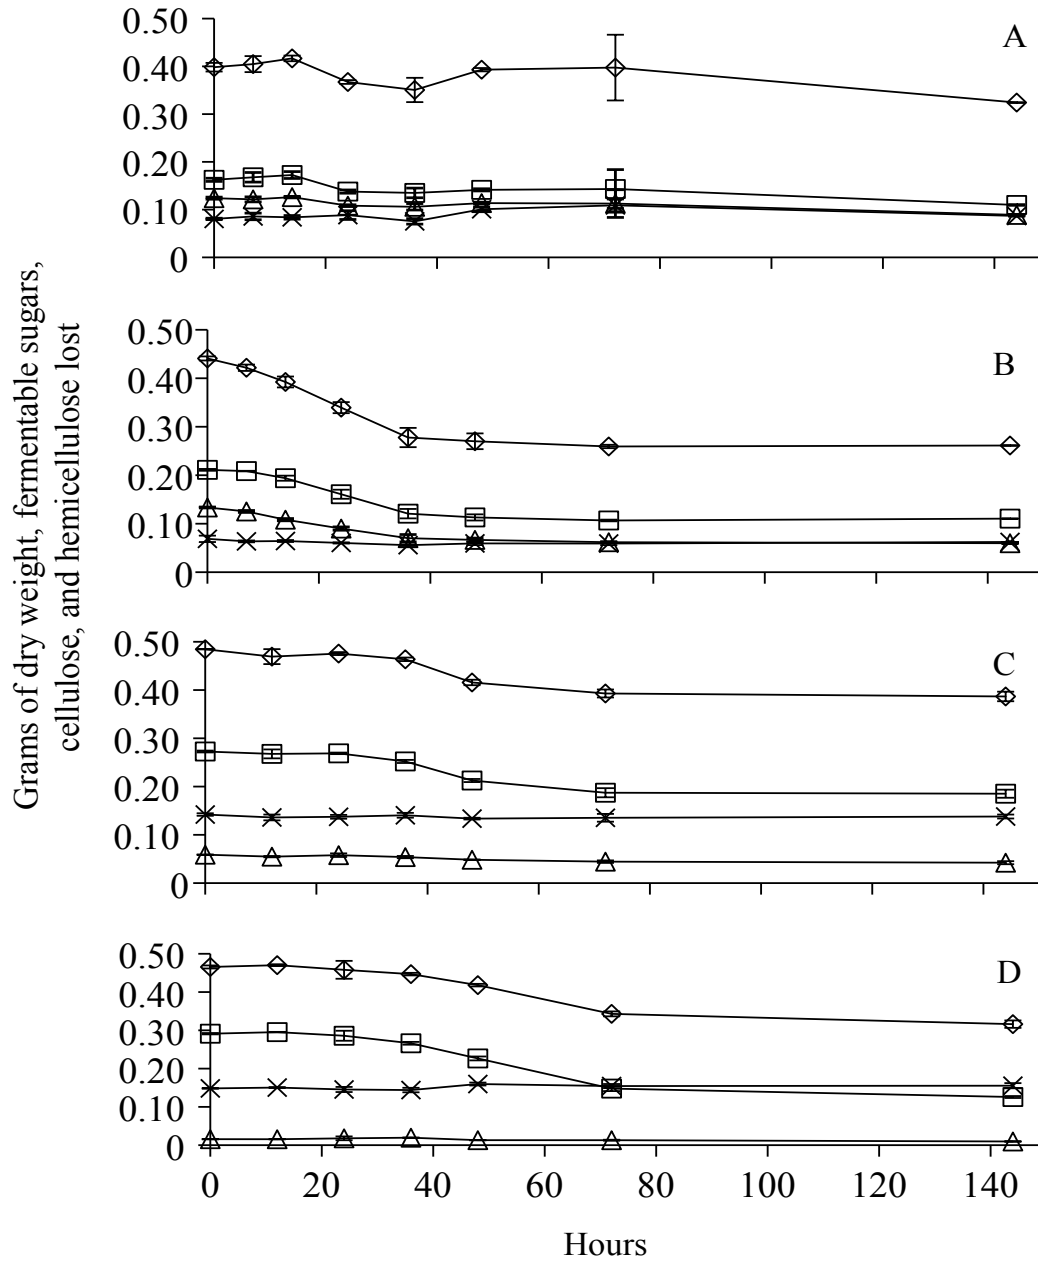

4

5

1 **Figure S9.** Acids and alcohols produced during switchgrass degradation. Lactate (■),  
 2 formate (●), acetate (▲), and ethanol (◆) production in microcosms that contained  
 3 untreated (A), acid-treated (B), sodium hydroxide-treated (C), and hydrothermolysis-  
 4 treated switchgrass (D).

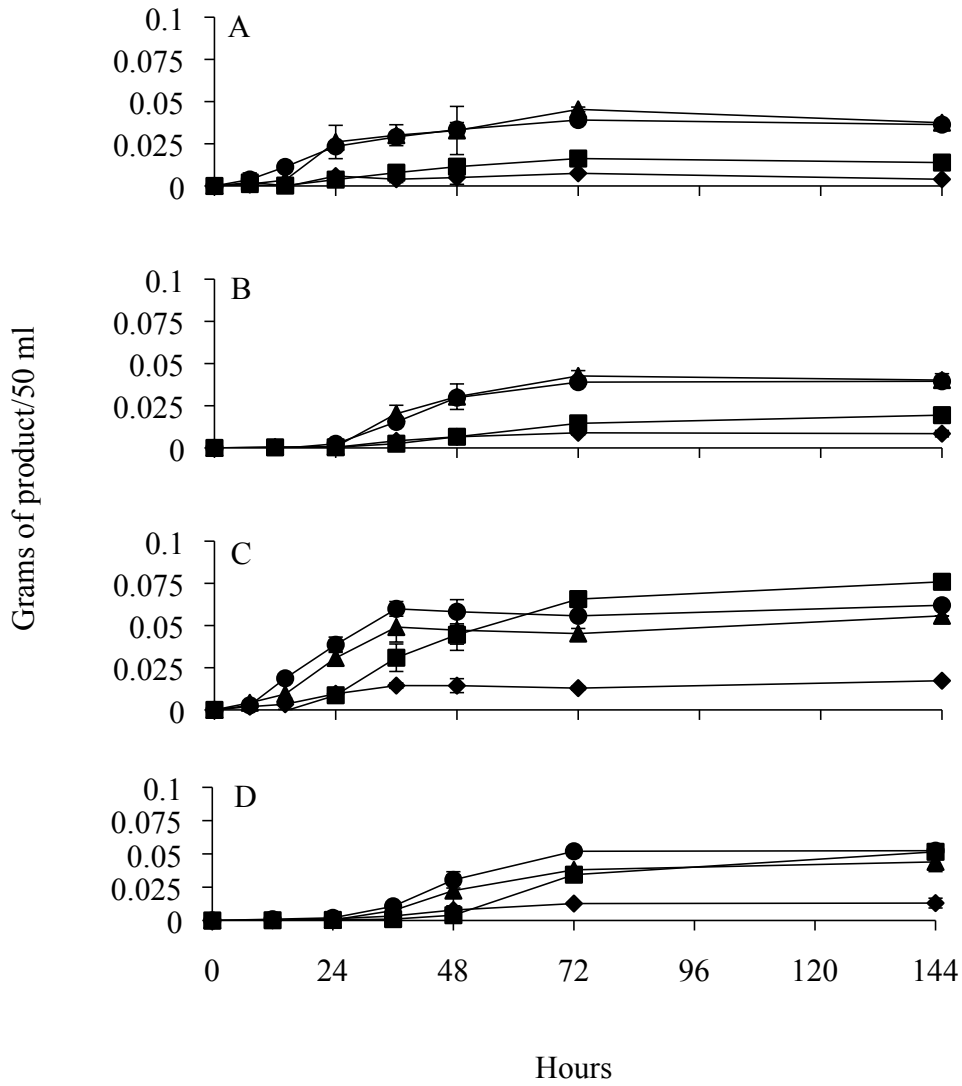

5

6

1 **IV. Supplementary tables.**

2 In all tables, genes with labeled “Orpinomyces\_” have been identified in C1A genome  
3 assembly. Genes with an IMG number have only been identified in the transcriptome of  
4 cellobiose-grown cultures.

5

6 Table S1. The C1A genome sequencing efforts summary

---

|                                               |             |
|-----------------------------------------------|-------------|
| Illumina Genomic Passed Filtered Paired Reads | 146,385,792 |
| Illumina Genomic Total Bases                  | 29.2 GB     |
| Illumina cellobiose transcriptome Reads       | 292,771,584 |
| Illumina cellobiose transcriptome Total Bases | 35.2 GB     |
| Illumina cellulose transcriptome Reads        | 26,627,384  |
| Illumina cellulose transcriptome Total Bases  | 3.9 GB      |
| <br>                                          |             |
| Pacific Biosciences SMRT Total Reads          | 480,781     |
| Pacific Biosciences SMRT Total Bases          | 1.01 GB     |
| C-SMRT Total Reads                            | 394,300     |
| C-SMRT Total Bases                            | 570.1 MB    |

---

7

8

1 Table S2. Comparison between genome assembly using Illumina only sequence data and  
 2 SMRT-Illumina hybrid assembly

|                               | Illumina Only | PacBio/Illumina assembly |
|-------------------------------|---------------|--------------------------|
| Genome assembly size          | 105.1 MB      | 100.85 MB                |
| In 1kb+ Contigs               | 73.52 MB      | 100.95 MB                |
| Number of ambiguous bp        | 91,688 bp     | 0                        |
| N50 of 1kb+ Contigs           | 2,226 bp      | 3,373 bp                 |
| N90 of 1kb contigs            | 1,072 bp      | 1,829 bp                 |
| Average length of gene model  | 903 bp        | 1623 bp                  |
| Number of introns             | 2,458         | 35,697                   |
| Number of gene models         | 14,594        | 16,437                   |
| GC% Content                   | 15.8          | 17.0                     |
| Total PASA/Trinity Assemblies | 10,115        | 14,009                   |

3

4



1 Table S3. Gene model predictions in the C1A genome

---

|                                                     |         |
|-----------------------------------------------------|---------|
| Trinity De Novo Assembled Transcripts 300bp+        | 25,934  |
| N50 of Trinity De Novo Assembled Transcripts 300bp+ | 1082 bp |
| GlimmerHMM+Augstus Models ab initio                 | 60,595  |
| PASA Assemblies                                     | 14,009  |
| PASA GMAP RNA Alignments                            | 38,647  |
| Total EVM Consoldated Models                        | 16,347  |

---

2

3

Table S4. General genomic features of the C1A genome

|                                  |                  |
|----------------------------------|------------------|
| Genome size                      | 100.95MB         |
| Number of Contigs                | 32,574           |
| Protein Coding                   | 20.60%           |
| Non-coding intergenic            | 73.60%           |
| Non-coding introns               | 5.10%            |
| rRNA                             | 0.67%            |
| 5.8S                             | 183 (30,763 bp)  |
| 18S                              | 272 (168,110 bp) |
| 28S                              | 366 (457,301 bp) |
| tRNA                             | 0.06%            |
|                                  | 770 (58,292 bp)  |
| Number of Genes                  | 16,347           |
| Number of Genes with transcripts | 14,009           |
| Average Gene Length              | 1623             |
|                                  |                  |
| Number of Intron                 | 35,697           |
| Introns/gene                     | 2.18             |
| Average Intronlength             | 163              |
| Number of Exons                  | 52,044           |
|                                  |                  |
| GC content                       | 17.00%           |
| Protein Coding                   | 26.80%           |
| Intergenic                       | 14.80%           |
| Intron                           | 8.10%            |
|                                  |                  |
| SSR Repeats                      | 4.90%            |
| TE repeats                       | 3.31%            |

1

Table S5. Other genomes used in this study.

| Dataset Name                                    | NCBI taxon ID | Kingdom      | Phylum            | Genome Size Mb | GC Ratio     | ORF #        | Intron#      | coding density |
|-------------------------------------------------|---------------|--------------|-------------------|----------------|--------------|--------------|--------------|----------------|
| <b>Ascomycetes</b>                              |               |              |                   |                |              |              |              |                |
| <b>Pezizomycotina</b>                           |               |              |                   |                |              |              |              |                |
| <b>Ajellomyces dermatitidis SLH14081</b>        | <b>559298</b> | <b>Fungi</b> | <b>Ascomycota</b> | <b>75.35</b>   | <b>35.76</b> | <b>9555</b>  | <b>22100</b> | <b>17.12</b>   |
| <b>Arthroderma benhamiae CBS 112371</b>         | <b>663331</b> | <b>Fungi</b> | <b>Ascomycota</b> | <b>22.22</b>   | <b>48.75</b> | <b>7980</b>  | <b>12672</b> | <b>53.24</b>   |
| <b>Aspergillus clavatus NRRL 1</b>              | <b>344612</b> | <b>Fungi</b> | <b>Ascomycota</b> | <b>27.86</b>   | <b>49.21</b> | <b>9121</b>  | <b>18838</b> | <b>48.57</b>   |
| <b>Aspergillus flavus NRRL3357</b>              | <b>332952</b> | <b>Fungi</b> | <b>Ascomycota</b> | <b>36.79</b>   | <b>48.35</b> | <b>12604</b> | <b>28367</b> | <b>47.32</b>   |
| Aspergillus fumigatus A1163                     | 451804        | Fungi        | Ascomycota        | 29.21          | 49.55        | 9929         | 19165        | 49.00          |
| <b>Aspergillus fumigatus Af293</b>              | <b>330879</b> | <b>Fungi</b> | <b>Ascomycota</b> | <b>29.39</b>   | <b>49.80</b> | <b>9887</b>  | <b>18277</b> | <b>48.83</b>   |
| <b>Aspergillus nidulans FGSC A4</b>             | <b>227321</b> | <b>Fungi</b> | <b>Ascomycota</b> | <b>30.07</b>   | <b>50.32</b> | <b>10701</b> | <b>24824</b> | <b>51.45</b>   |
| Aspergillus niger ATCC 1015                     | 380704        | Fungi        | Ascomycota        | 37.20          | 50.36        | 11200        | 23771        | 45.17          |
| <b>Aspergillus niger CBS 513.88</b>             | <b>425011</b> | <b>Fungi</b> | <b>Ascomycota</b> | <b>33.98</b>   | <b>50.37</b> | <b>14086</b> | <b>36285</b> | <b>65.42</b>   |
| <b>Aspergillus oryzae RIB40</b>                 | <b>510516</b> | <b>Fungi</b> | <b>Ascomycota</b> | <b>37.12</b>   | <b>48.24</b> | <b>12063</b> | <b>23256</b> | <b>43.83</b>   |
| <b>Aspergillus terreus NIH2624</b>              | <b>341663</b> | <b>Fungi</b> | <b>Ascomycota</b> | <b>29.33</b>   | <b>52.90</b> | <b>10406</b> | <b>22710</b> | <b>53.25</b>   |
| <b>Chaetomium globosum CBS 148.51</b>           | <b>306901</b> | <b>Fungi</b> | <b>Ascomycota</b> | <b>34.89</b>   | <b>55.56</b> | <b>11124</b> | <b>23599</b> | <b>56.77</b>   |
| Coccidioides immitis H538.4                     | 396776        | Fungi        | Ascomycota        | 27.73          | 46.96        | 10663        | 23840        | 40.96          |
| Coccidioides immitis RMSCC 2394                 | 404692        | Fungi        | Ascomycota        | 28.82          | 46.23        | 10408        | 24399        | 43.82          |
| Coccidioides immitis RMSCC 3703                 | 454286        | Fungi        | Ascomycota        | 27.65          | 47.08        | 10465        | 23466        | 39.86          |
| <b>Coccidioides immitis RS</b>                  | <b>246410</b> | <b>Fungi</b> | <b>Ascomycota</b> | <b>28.89</b>   | <b>46.02</b> | <b>10457</b> | <b>25680</b> | <b>44.02</b>   |
| Coccidioides posadasii RMSCC 3488               | 454284        | Fungi        | Ascomycota        | 28.15          | 46.33        | 9964         | 23520        | 44.03          |
| <b>Coccidioides posadasii Silveira</b>          |               | <b>Fungi</b> | <b>Ascomycota</b> | <b>27.47</b>   | <b>46.86</b> | <b>10125</b> | <b>23395</b> | <b>45.56</b>   |
| <b>Cochliobolus heterostrophus ATCC 48331</b>   | <b>665024</b> | <b>Fungi</b> | <b>Ascomycota</b> | <b>32.93</b>   | <b>50.73</b> | <b>12720</b> |              | <b>56.42</b>   |
| <b>Cochliobolus heterostrophus C5</b>           | <b>701091</b> | <b>Fungi</b> | <b>Ascomycota</b> | <b>34.86</b>   | <b>49.98</b> | <b>9633</b>  | <b>18374</b> | <b>52.63</b>   |
| Cryphonectria parasitica EP155                  | 660469        | Fungi        | Ascomycota        | 43.86          | 50.83        | 11184        | 21906        | 33.54          |
| Fusarium graminearum GZ3639                     |               | Fungi        | Ascomycota        | 15.15          | 50.47        | 6694         | 4998         |                |
| <b>Fusarium graminearum PH-1</b>                | <b>229533</b> | <b>Fungi</b> | <b>Ascomycota</b> | <b>36.55</b>   | <b>48.28</b> | <b>13339</b> | <b>24232</b> | <b>55.63</b>   |
| <b>Fusarium oxysporum lycopersici FGSC 4287</b> | <b>426428</b> | <b>Fungi</b> | <b>Ascomycota</b> | <b>61.36</b>   | <b>48.40</b> | <b>17608</b> | <b>29443</b> | <b>39.69</b>   |
| Gaeumannomyces graminis var. tritici R3-111a-1  | 644352        | Fungi        | Ascomycota        | 43.26          | 56.85        | 14463        | 25024        | 42.79          |
| Gibberella moniliformis 7600                    | 334819        | Fungi        | Ascomycota        | 41.87          | 48.67        | 14199        | 25309        | 42.81          |
| Histoplasma (Ajellomyces) capsulatum G186AR     | 447093        | Fungi        | Ascomycota        | 29.91          | 44.38        | 7454         | 17108        | 41.25          |

|                                                      |               |              |                   |              |              |              |              |              |
|------------------------------------------------------|---------------|--------------|-------------------|--------------|--------------|--------------|--------------|--------------|
| Histoplasma (Ajellomyces) capsulatum G217B           | 447094        | Fungi        | Ascomycota        | 41.29        | 42.75        | 8038         | 18673        |              |
| Histoplasma capsulatum H143                          | 544712        | Fungi        | Ascomycota        | 38.96        | 41.71        | 7365         | 17799        | 29.81        |
| Histoplasma capsulatum H88                           | 544711        | Fungi        | Ascomycota        | 37.94        | 42.00        | 7428         | 17928        | 33.28        |
| <b>Histoplasma capsulatum NAm1</b>                   | <b>339724</b> | <b>Fungi</b> | <b>Ascomycota</b> | <b>32.99</b> | <b>46.16</b> | <b>9349</b>  | <b>23495</b> | <b>35.89</b> |
| <b>Magnaporthe oryzae 70-15</b>                      | <b>242507</b> | <b>Fungi</b> | <b>Ascomycota</b> | <b>41.62</b> | <b>51.68</b> | <b>12841</b> | <b>21348</b> | <b>41.10</b> |
| Magnaporthe poae ATCC 64411                          | 644358        | Fungi        | Ascomycota        | 39.50        | 56.99        | 12169        | 21875        | 39.54        |
| <b>Microsporium (Arthroderma) canis CBS 113480</b>   | <b>554155</b> | <b>Fungi</b> | <b>Ascomycota</b> | <b>23.26</b> | <b>47.50</b> | <b>8777</b>  | <b>19991</b> | <b>55.97</b> |
| <b>Microsporium (Arthroderma) gypseum CBS 118893</b> | <b>535722</b> | <b>Fungi</b> | <b>Ascomycota</b> | <b>23.27</b> | <b>48.46</b> | <b>8876</b>  | <b>19748</b> | <b>55.00</b> |
| Myceliophthora thermophila ATCC 42464                | 573729        | Fungi        | Ascomycota        | 38.74        | 51.40        | 9110         | 16657        | 33.52        |
| Mycosphaerella fijiensis CIRAD86                     | 383855        | Fungi        | Ascomycota        | 73.37        | 45.30        | 10327        | 14962        | 22.91        |
| Mycosphaerella graminicola IPO323                    | 336722        | Fungi        | Ascomycota        | 41.86        | 52.29        | 11395        | 19234        | 34.05        |
| <b>Nectria haematococca MPVI</b>                     | <b>660122</b> | <b>Fungi</b> | <b>Ascomycota</b> | <b>51.29</b> | <b>50.79</b> | <b>15707</b> | <b>32680</b> | <b>49.33</b> |
| <b>Neosartorya fischeri NRRL 181</b>                 | <b>331117</b> | <b>Fungi</b> | <b>Ascomycota</b> | <b>32.55</b> | <b>49.43</b> | <b>10406</b> | <b>20578</b> | <b>46.87</b> |
| <b>Neurospora crassa OR74A</b>                       | <b>367110</b> | <b>Fungi</b> | <b>Ascomycota</b> | <b>39.23</b> | <b>49.29</b> | <b>9842</b>  | <b>17346</b> | <b>45.45</b> |
| <b>Paracoccidioides brasiliensis Pb01</b>            | <b>502779</b> | <b>Fungi</b> | <b>Ascomycota</b> | <b>32.97</b> | <b>42.80</b> | <b>9136</b>  | <b>28174</b> | <b>36.86</b> |
| Paracoccidioides brasiliensis Pb03                   | 482561        | Fungi        | Ascomycota        | 29.09        | 44.48        | 9264         | 22384        | 38.84        |
| Paracoccidioides brasiliensis Pb18                   | 502780        | Fungi        | Ascomycota        | 30.00        | 44.33        | 8741         | 24498        | 39.28        |
| <b>Penicillium chrysogenum Wisconsin 54-1255</b>     | <b>500485</b> | <b>Fungi</b> | <b>Ascomycota</b> | <b>32.22</b> | <b>48.96</b> | <b>12791</b> | <b>27650</b> | <b>30.58</b> |
| <b>Penicillium marneffei ATCC 18224</b>              | <b>441960</b> | <b>Fungi</b> | <b>Ascomycota</b> | <b>28.64</b> | <b>46.67</b> | <b>10638</b> | <b>23668</b> | <b>59.52</b> |
| <b>Phaeosphaeria nodorum SN15</b>                    | <b>321614</b> | <b>Fungi</b> | <b>Ascomycota</b> | <b>37.24</b> | <b>50.42</b> | <b>16597</b> | <b>27420</b> | <b>42.17</b> |
| <b>Podospora anserina S mat+</b>                     | <b>515849</b> | <b>Fungi</b> | <b>Ascomycota</b> | <b>35.71</b> | <b>52.04</b> | <b>10596</b> | <b>13841</b> | <b>42.67</b> |
| <b>Pyrenophora tritici-repentis Pt-1C-BFP</b>        | <b>426418</b> | <b>Fungi</b> | <b>Ascomycota</b> | <b>38.00</b> | <b>50.89</b> | <b>12169</b> | <b>20548</b> | <b>49.33</b> |
| <b>Sclerotinia sclerotiorum 1980 UF-70</b>           | <b>665079</b> | <b>Fungi</b> | <b>Ascomycota</b> | <b>38.33</b> | <b>41.84</b> | <b>14522</b> | <b>26101</b> | <b>38.59</b> |
| <b>Talaromyces stipitatus ATCC 10500</b>             | <b>441959</b> | <b>Fungi</b> | <b>Ascomycota</b> | <b>35.69</b> | <b>46.10</b> | <b>13356</b> |              | <b>57.30</b> |
| Thielavia terrestris NRRL 8126                       | 578455        | Fungi        | Ascomycota        | 36.91        | 54.70        | 9813         | 18204        | 37.00        |
| Trichoderma atroviride IMI 206040                    | 452589        | Fungi        | Ascomycota        | 36.09        | 49.80        | 11100        | 21463        | 44.92        |
| Trichoderma reesei QM6a                              | 431241        | Fungi        | Ascomycota        | 33.45        | 52.81        | 9129         | 18762        | 40.30        |
| Trichoderma virens Gv29-8                            | 431241        | Fungi        | Ascomycota        | 38.77        | 49.44        | 11643        | 23030        | 45.26        |
| Trichophyton equinum CBS 127.97                      | 559882        | Fungi        | Ascomycota        | 24.16        | 47.37        | 8576         | 19382        | 49.32        |
| Trichophyton rubrum CBS 118892                       | 559305        | Fungi        | Ascomycota        | 22.50        | 48.31        | 8707         | 18269        | 53.91        |
| Trichophyton tonsurans CBS 112818                    | 647933        | Fungi        | Ascomycota        | 22.96        | 48.15        | 8523         | 18366        | 52.29        |
| <b>Trichophyton verrucosum HKI 0517</b>              | <b>663202</b> | <b>Fungi</b> | <b>Ascomycota</b> | <b>22.54</b> | <b>48.24</b> | <b>8024</b>  | <b>12612</b> | <b>52.26</b> |

|                                                       |               |              |                   |               |              |              |              |              |
|-------------------------------------------------------|---------------|--------------|-------------------|---------------|--------------|--------------|--------------|--------------|
| <b>Tuber melanosporum Mel28</b>                       | <b>656061</b> | <b>Fungi</b> | <b>Ascomycota</b> | <b>124.95</b> | <b>44.86</b> | <b>7496</b>  | <b>21525</b> | <b>9.74</b>  |
| <b>Uncinocarpus reesii 1704</b>                       | <b>336963</b> | <b>Fungi</b> | <b>Ascomycota</b> | <b>22.35</b>  | <b>48.66</b> | <b>7798</b>  | <b>16296</b> | <b>57.24</b> |
| <b>Verticillium albo-atrum VaMs.102</b>               | <b>526221</b> | <b>Fungi</b> | <b>Ascomycota</b> | <b>32.86</b>  | <b>56.03</b> | <b>10239</b> | <b>18603</b> | <b>40.91</b> |
| Verticillium dahliae VdLs.17                          | 498257        | Fungi        | Ascomycota        | 33.90         | 55.79        | 10575        | 19161        | 44.29        |
|                                                       |               |              |                   |               |              |              |              |              |
| <b>Saccharomycotina</b>                               |               |              |                   |               |              |              |              |              |
| <b>Candida dubliniensis CD36</b>                      | <b>573826</b> | <b>Fungi</b> | <b>Ascomycota</b> | <b>14.62</b>  | <b>33.25</b> | <b>5972</b>  | <b>372</b>   | <b>60.10</b> |
| <b>Lachancea thermotolerans CBS 6340</b>              | <b>559295</b> | <b>Fungi</b> | <b>Ascomycota</b> | <b>10.42</b>  | <b>47.25</b> | <b>5102</b>  |              | <b>73.05</b> |
| <b>Pichia pastoris GS115</b>                          | <b>644223</b> | <b>Fungi</b> | <b>Ascomycota</b> | <b>9.22</b>   | <b>41.10</b> | <b>5040</b>  |              | <b>78.88</b> |
| <b>Ashbya gossypii ATCC 10895</b>                     | <b>284811</b> | <b>Fungi</b> | <b>Ascomycota</b> | <b>8.77</b>   | <b>51.85</b> | <b>4717</b>  | <b>226</b>   | <b>80.09</b> |
| Botryotinia fuckeliana B05.10                         | 332648        | Fungi        | Ascomycota        | 42.74         | 43.04        | 16584        |              | 47.24        |
| <b>Candida albicans SC5314</b>                        | <b>237561</b> | <b>Fungi</b> | <b>Ascomycota</b> | <b>14.30</b>  | <b>33.46</b> | <b>6090</b>  | <b>534</b>   | <b>62.38</b> |
| Candida albicans WO-1                                 | 294748        | Fungi        | Ascomycota        | 14.47         | 33.47        | 6160         | 235          | 61.23        |
| <b>Candida glabrata CBS138</b>                        | <b>284593</b> | <b>Fungi</b> | <b>Ascomycota</b> | <b>12.28</b>  | <b>38.61</b> | <b>5165</b>  | <b>84</b>    | <b>64.36</b> |
| <b>Candida lusitanae ATCC 42720</b>                   | <b>306902</b> | <b>Fungi</b> | <b>Ascomycota</b> | <b>12.11</b>  | <b>44.50</b> | <b>5941</b>  | <b>15</b>    | <b>65.53</b> |
| Candida parapsilosis CDC317                           | 578454        | Fungi        | Ascomycota        | 13.09         | 38.69        | 5733         | 0            | 66.87        |
| <b>Candida tropicalis MYA-3404</b>                    | <b>294747</b> | <b>Fungi</b> | <b>Ascomycota</b> | <b>14.63</b>  | <b>33.15</b> | <b>6258</b>  | <b>34</b>    | <b>62.13</b> |
| <b>Debaryomyces hansenii var hansenii CBS767</b>      | <b>284592</b> | <b>Fungi</b> | <b>Ascomycota</b> | <b>12.22</b>  | <b>36.28</b> | <b>6354</b>  | <b>356</b>   | <b>71.39</b> |
| <b>Kluyveromyces lactis NRRL Y-1140</b>               | <b>284590</b> | <b>Fungi</b> | <b>Ascomycota</b> | <b>10.69</b>  | <b>38.76</b> | <b>5327</b>  | <b>130</b>   | <b>70.57</b> |
| Lachancea kluyveri NRRL Y-12651                       | 226302        | Fungi        | Ascomycota        | 11.03         | 41.64        | 2968         | 0            |              |
| Lachancea waltii NCYC 2644                            | 262981        | Fungi        | Ascomycota        | 10.91         | 44.29        | 4935         | 460          | 70.87        |
| <b>Lodderomyces elongisporus NRRL YB-4239</b>         | <b>379508</b> | <b>Fungi</b> | <b>Ascomycota</b> | <b>15.55</b>  | <b>36.95</b> | <b>5802</b>  | <b>54</b>    | <b>56.83</b> |
| <b>Meyerozyma guilliermondii ATCC 6260</b>            | <b>294746</b> | <b>Fungi</b> | <b>Ascomycota</b> | <b>10.61</b>  | <b>43.76</b> | <b>5920</b>  | <b>15</b>    | <b>77.49</b> |
| <b>Nadsonia fulvescens elongata AJ 4281, DSM 6958</b> | <b>857566</b> | <b>Fungi</b> | <b>Ascomycota</b> | <b>13.75</b>  | <b>39.25</b> | <b>5657</b>  |              | <b>61.89</b> |
| Naumovozya castellii CBS 4309                         | 1064592       | Fungi        | Ascomycota        | 11.35         | 36.95        | 4677         | 0            |              |
| Saccharomyces bayanus 623-6C                          | 226231        | Fungi        | Ascomycota        | 11.87         | 40.20        | 4966         | 0            |              |
| <b>Saccharomyces cerevisiae RM11-1a</b>               | <b>285006</b> | <b>Fungi</b> | <b>Ascomycota</b> | <b>11.74</b>  | <b>38.29</b> | <b>5696</b>  | <b>292</b>   | <b>61.57</b> |
| <b>Saccharomyces cerevisiae S288C</b>                 | <b>559292</b> | <b>Fungi</b> | <b>Ascomycota</b> | <b>12.16</b>  | <b>38.15</b> | <b>6692</b>  | <b>350</b>   | <b>72.58</b> |
| <b>Saccharomyces cerevisiae YJM789</b>                | <b>307796</b> | <b>Fungi</b> | <b>Ascomycota</b> | <b>11.99</b>  | <b>38.31</b> | <b>5903</b>  | <b>250</b>   | <b>71.60</b> |
| Saccharomyces kudriavzevii IFO 1802                   | 226230        | Fungi        | Ascomycota        | 11.18         | 39.85        | 3768         | 0            |              |
| Saccharomyces mikatae IFO 1815                        | 226126        | Fungi        | Ascomycota        | 11.47         | 37.97        | 9016         | 0            |              |
| Saccharomyces mikatae IFO 1815                        | 226126        | Fungi        | Ascomycota        | 10.83         | 38.14        | 3100         | 0            |              |

|                                                             |               |              |                      |              |              |              |              |              |
|-------------------------------------------------------------|---------------|--------------|----------------------|--------------|--------------|--------------|--------------|--------------|
| <i>Saccharomyces paradoxus</i> NRRL Y-17217                 | 226125        | Fungi        | Ascomycota           | 11.87        | 38.69        | 8939         | 0            |              |
| <b>Scheffersomyces stipitis CBS 6054</b>                    | <b>322104</b> | <b>Fungi</b> | <b>Ascomycota</b>    | <b>15.44</b> | <b>41.14</b> | <b>5839</b>  | <b>2589</b>  | <b>61.12</b> |
| <i>Vanderwaltozyma polyspora</i> DSM 70294                  | 436907        | Fungi        | Ascomycota           | 14.67        | 33.03        | 5367         | 157          | 57.89        |
| <i>Yarrowia lipolytica</i> CLIB122                          | 284591        | Fungi        | Ascomycota           | 20.50        | 49.05        | 6524         | 740          | 47.05        |
| <i>Zygosaccharomyces rouxii</i> CBS 732                     | 559307        | Fungi        | Ascomycota           | 9.77         | 39.20        | 5272         |              | 76.82        |
| <b>Taphrinomycotina</b>                                     |               |              |                      |              |              |              |              |              |
| <i>Schizosaccharomyces cryophilus</i> OY26                  | 653667        | Fungi        | Ascomycota           | 11.55        | 37.67        | 5163         | 5929         | 60.56        |
| <b>Schizosaccharomyces japonicus yFS275</b>                 | <b>402676</b> | <b>Fungi</b> | <b>Ascomycota</b>    | <b>11.30</b> | <b>43.67</b> | <b>5172</b>  | <b>5149</b>  | <b>64.01</b> |
| <i>Schizosaccharomyces octosporus</i> yFS286                | 483514        | Fungi        | Ascomycota           | 11.22        | 37.53        | 4925         | 5243         | 58.97        |
| <b>Schizosaccharomyces pombe 972h-</b>                      | <b>284812</b> | <b>Fungi</b> | <b>Ascomycota</b>    | <b>12.59</b> | <b>36.05</b> | <b>5058</b>  | <b>4811</b>  | <b>59.89</b> |
| <i>Saitoella complicata</i> NRRL Y-17804                    | 698492        | Fungi        | Ascomycota           | 14.14        | 52.60        | 7034         |              | 67.51        |
| <b>Basidiomycetes</b>                                       |               |              |                      |              |              |              |              |              |
| <b>Agaricomycetes</b>                                       |               |              |                      |              |              |              |              |              |
| <i>Botryobasidium botryosum</i>                             | 264124        | Fungi        | Basidiomycota        | 46.67        | 52.44        | 16526        |              | 53.06        |
| <i>Moniliophthora perniciosa</i> FA553                      | 554373        | Fungi        | Basidiomycota        | 26.67        | 47.74        | 13674        |              | 35.18        |
| <i>Coprinopsis cinerea</i> okayama7#130                     | 240176        | Fungi        | Basidiomycota        | 36.25        | 51.64        | 13544        | 59343        | 51.24        |
| <i>Cryptococcus gattii</i> R265                             | 294750        | Fungi        | Basidiomycota        | 17.50        | 47.79        | 6210         | 32178        | 54.83        |
| <b>Cryptococcus neoformans var neoformans B-3501A</b>       | <b>283643</b> | <b>Fungi</b> | <b>Basidiomycota</b> | <b>18.52</b> | <b>48.48</b> | <b>6431</b>  | <b>34511</b> | <b>64.92</b> |
| <b>Cryptococcus neoformans var neoformans JEC 21</b>        | <b>214684</b> | <b>Fungi</b> | <b>Basidiomycota</b> | <b>19.05</b> | <b>48.54</b> | <b>6475</b>  | <b>34336</b> | <b>64.77</b> |
| <i>Cryptococcus neoformans</i> var. <i>grubii</i> H99       | 235443        | Fungi        | Basidiomycota        | 19.46        | 48.18        | 7302         | 36023        | 56.81        |
| <i>Cryptococcus neoformans</i> var. <i>neoformans</i> WM276 |               | Fungi        | Basidiomycota        | 19.01        | 47.84        | 6870         | 33719        | 55.59        |
| <b>Gymnopus luxurians</b> FD-317 M1                         | <b>206324</b> | <b>Fungi</b> | <b>Basidiomycota</b> | <b>66.28</b> | <b>45.08</b> | <b>22057</b> |              | <b>47.16</b> |
| <i>Hypholoma sublateritium</i> FD-334 SS-4                  | 71945         | Fungi        | Basidiomycota        | 48.03        | 51.04        | 17911        |              | 54.50        |
| <i>Laccaria bicolor</i> S238N-H82                           | 486041        | Fungi        | Basidiomycota        | 64.88        | 46.97        | 20614        | 90676        | 41.34        |
| <i>Phanerochaete chrysosporium</i> RP-78                    | 273507        | Fungi        | Basidiomycota        | 35.15        | 56.82        | 10048        | 48688        | 47.65        |
| <i>Postia placenta</i> MAD 698-R                            | 561896        | Fungi        | Basidiomycota        | 90.93        | 53.83        | 17173        | 99423        | 19.39        |
| <i>Schizophyllum commune</i> H4-8                           | 578458        | Fungi        | Basidiomycota        | 38.62        | 57.50        | 14652        |              | 58.31        |
| <i>Serpula lacrymans</i> lacrymans S7.9                     | 341189        | Fungi        | Basidiomycota        | 42.75        | 45.30        | 16257        |              | 46.04        |
| <b>Pucciniomycotina</b>                                     |               |              |                      |              |              |              |              |              |

|                                                                |               |              |                           |              |              |              |              |              |
|----------------------------------------------------------------|---------------|--------------|---------------------------|--------------|--------------|--------------|--------------|--------------|
| <i>Puccinia graminis</i> f. sp. <i>tritici</i> CRL 75-36-700-3 | 418459        | Fungi        | Basidiomycota             | 88.72        | 43.35        | 20567        | 75271        | 25.54        |
| <i>Puccinia graminis</i> <i>tritici</i>                        | 413621        | Fungi        | Basidiomycota             | 88.64        | 43.35        | 15800        | 56898        | 21.08        |
| <i>Puccinia triticina</i> 1-1 BBBB Race 1                      | 630390        | Fungi        | Basidiomycota             | 162.95       | 46.34        | 11638        | 38114        | 8.60         |
| <i>Sporobolomyces roseus</i> IAM 13481                         | 365493        | Fungi        | Basidiomycota             | 21.17        | 53.75        | 5536         | 34375        | 44.30        |
| <b>Ustilaginomycotina</b>                                      |               |              |                           |              |              |              |              |              |
| <b><i>Malassezia globosa</i> CBS 7966</b>                      | <b>425265</b> | <b>Fungi</b> | <b>Basidiomycota</b>      | <b>8.96</b>  | <b>52.06</b> | <b>4286</b>  | <b>0</b>     | <b>71.13</b> |
| <i>Ustilago maydis</i> 521                                     | 237631        | Fungi        | Basidiomycota             | 19.74        | 53.96        | 6689         | 4900         | 64.32        |
| <i>Ustilago maydis</i> FB1                                     | 559306        | Fungi        | Basidiomycota             | 19.30        | 54.03        | 6950         | 3360         |              |
| <b>Basal fungal lineages</b>                                   |               |              |                           |              |              |              |              |              |
| <b>Blastocladiomycetes</b>                                     |               |              |                           |              |              |              |              |              |
| <b><i>Allomyces macrogynus</i> ATCC 38327</b>                  | <b>578462</b> | <b>Fungi</b> | <b>Blastocladiomycota</b> | <b>57.06</b> | <b>61.59</b> | <b>18773</b> | <b>48417</b> | <b>47.48</b> |
| <b>Chytridiomycetes</b>                                        |               |              |                           |              |              |              |              |              |
| <i>Batrachochytrium dendrobatidis</i> JAM81                    | 684364        | Fungi        | Chytridiomycota           | 24.32        | 39.25        | 8732         | 28691        | 48.54        |
| <b><i>Batrachochytrium dendrobatidis</i> JEL423</b>            | <b>403673</b> | <b>Fungi</b> | <b>Chytridiomycota</b>    | <b>23.90</b> | <b>39.27</b> | <b>8818</b>  | <b>29733</b> | <b>66.26</b> |
| <i>Homolophyctis polyrhiza</i> JEL 142                         | 166479        | Fungi        | Chytridiomycota           | 26.70        |              |              | 0            |              |
| <b><i>Spizellomyces punctatus</i> DAOM BR117</b>               | <b>645134</b> | <b>Fungi</b> | <b>Chytridiomycota</b>    | <b>24.13</b> | <b>47.60</b> | <b>8952</b>  | <b>47775</b> | <b>57.73</b> |
| <b>Early diverging fungal lineages</b>                         |               |              |                           |              |              |              |              |              |
| <i>Mortierella verticillata</i> NRRL 6337                      | 1069443       | Fungi        | Mortierellomycotina       | 41.85        | 48.90        | 12457        | 35253        | 46.27        |
| <i>Phycomyces blakesleeanus</i> NRRL 1555(-)                   | 763407        | Fungi        | Mucoromycotina            | 55.85        | 35.72        | 14792        | 56260        | 31.32        |
| <b><i>Rhizopus oryzae</i> RA 99-880</b>                        | <b>246409</b> | <b>Fungi</b> | <b>Mucoromycotina</b>     | <b>46.09</b> | <b>35.60</b> | <b>17459</b> | <b>40515</b> | <b>38.98</b> |
| <b>Microsporidia</b>                                           |               |              |                           |              |              |              |              |              |
| <b>Apansporoblastina</b>                                       |               |              |                           |              |              |              |              |              |
| <b><i>Enterocytozoon bienersi</i> H348</b>                     | <b>481877</b> | <b>Fungi</b> | <b>Microsporidia</b>      | <b>3.86</b>  | <b>33.70</b> | <b>3804</b>  |              | <b>69.38</b> |
| <b><i>Nosema ceranae</i> BRL01</b>                             | <b>578460</b> | <b>Fungi</b> | <b>Microsporidia</b>      | <b>7.86</b>  | <b>25.30</b> | <b>2124</b>  |              | <b>25.79</b> |
| <b><i>Encephalitozoon cuniculi</i> GB-M1</b>                   | <b>284813</b> | <b>Fungi</b> | <b>Microsporidiae</b>     | <b>2.50</b>  | <b>47.31</b> | <b>1996</b>  | <b>0</b>     | <b>86.39</b> |
| <i>Encephalitozoon intestinalis</i> ATCC 50506                 | 876142        | Fungi        | Microsporidiae            | 2.01         | 41.53        | 1661         | 12           | 88.39        |
| <i>Nematocida parisi</i> ERTm1                                 | 881290        | Fungi        | Microsporidiae            | 4.03         | 34.42        | 2668         | 9            | 72.16        |

|                                         |        |           |                  |       |       |      |       |       |
|-----------------------------------------|--------|-----------|------------------|-------|-------|------|-------|-------|
| Nematocida parisi ERTm2                 | 944018 | Fungi     | Microsporidiae   | 4.65  | 38.34 | 2771 | 3     | 63.77 |
| Nematocida parisi ERTm3                 | 935791 | Fungi     | Microsporidiae   | 4.12  | 34.46 | 2726 | 8     | 69.22 |
| Vavraia culicus                         | 948595 | Fungi     | Microsporidiae   | 6.03  | 39.75 | 2780 | 4     | 46.90 |
| Vittaforma corneae ATCC 50505           | 993615 | Fungi     | Microsporidiae   | 3.15  | 36.47 | 2248 | 5     | 66.99 |
|                                         |        |           |                  |       |       |      |       |       |
| <b>Early diverging eukaryotes</b>       |        |           |                  |       |       |      |       |       |
| <b>Monosiga brevicollis MX1</b>         | 431895 | Eukaryota | Choanoflagellida | 41.63 | 54.89 | 9171 | 60511 | 39.73 |
| <b>Capsaspora Owczarzaki ATCC 30864</b> | 595528 | Eukaryota | Ichthyosporia    | 27.97 | 53.82 | 8657 | 34000 | 58.71 |
|                                         |        |           |                  |       |       |      |       |       |

Genomes shown in bold were used for genomic comparisons to C1A genome. All genomes (excluding the 2 early-diverging eukaryotic genomes *M. brevicollis*, and *C. owczarzaki*) were used for general genomic features comparisons shown in figures 1, and S2.



Table S6. Codon usage of strain C1A.

|          | T          |               |            | C          |               |            | A          |               |            | G          |               |            |          |
|----------|------------|---------------|------------|------------|---------------|------------|------------|---------------|------------|------------|---------------|------------|----------|
| <b>T</b> | <b>Phe</b> | <b>222513</b> | <b>71%</b> | <b>Ser</b> | <b>123748</b> | <b>25%</b> | <b>Tyr</b> | <b>272297</b> | <b>81%</b> | <b>Cys</b> | <b>86836</b>  | <b>78%</b> | <b>T</b> |
|          | Phe        | 92195         | 29%        | Ser        | 43322         | 9%         | Tyr        | 65460         | 19%        | Cys        | 24694         | 22%        | C        |
|          | <b>Leu</b> | <b>325171</b> | <b>51%</b> | <b>Ser</b> | <b>158623</b> | <b>32%</b> | STOP       | 117583        |            | STOP       | 63687         |            | <b>A</b> |
|          | Leu        | 89183         | 14%        | Ser        | 18226         | 4%         | STOP       | 37509         |            | Trp        | 62565         | 100%       | <b>G</b> |
| <b>C</b> | Leu        | 108453        | 17%        | Pro        | 49391         | 26%        | <b>His</b> | <b>102137</b> | <b>81%</b> | Arg        | 38442         | 17%        | <b>T</b> |
|          | Leu        | 25797         | 4%         | Pro        | 9867          | 5%         | His        | 23695         | 19%        | Arg        | 3757          | 2%         | <b>C</b> |
|          | Leu        | 56194         | 9%         | <b>Pro</b> | <b>122594</b> | <b>64%</b> | <b>Gln</b> | <b>188415</b> | <b>84%</b> | Arg        | 15915         | 7%         | <b>A</b> |
|          | Leu        | 30986         | 5%         | Pro        | 10250         | 5%         | Gln        | 36323         | 16%        | Arg        | 5702          | 3%         | <b>G</b> |
| <b>A</b> | <b>Ile</b> | <b>368709</b> | <b>52%</b> | <b>Thr</b> | <b>136253</b> | <b>43%</b> | <b>Asn</b> | <b>569337</b> | <b>86%</b> | <b>Ser</b> | <b>125877</b> | <b>25%</b> | <b>T</b> |
|          | Ile        | 73551         | 10%        | Thr        | 45815         | 15%        | Asn        | 91768         | 14%        | Ser        | 25415         | 5%         | <b>C</b> |
|          | <b>Ile</b> | <b>262623</b> | <b>37%</b> | <b>Thr</b> | <b>114251</b> | <b>36%</b> | <b>Lys</b> | <b>506477</b> | <b>77%</b> | <b>Arg</b> | <b>136988</b> | <b>60%</b> | <b>A</b> |
|          | Met        | 176282        | 100%       | Thr        | 18254         | 6%         | Lys        | 155221        | 23%        | Arg        | 26167         | 12%        | <b>G</b> |
| <b>G</b> | <b>Val</b> | <b>143837</b> | <b>47%</b> | <b>Ala</b> | <b>99628</b>  | <b>51%</b> | <b>Asp</b> | <b>282004</b> | <b>89%</b> | <b>Gly</b> | <b>114483</b> | <b>50%</b> | <b>T</b> |
|          | Val        | 28636         | 9%         | Ala        | 24755         | 13%        | Asp        | 33617         | 11%        | Gly        | 12215         | 5%         | <b>C</b> |
|          | <b>Val</b> | <b>96982</b>  | <b>32%</b> | <b>Ala</b> | <b>62492</b>  | <b>32%</b> | <b>Glu</b> | <b>374225</b> | <b>90%</b> | <b>Gly</b> | <b>89723</b>  | <b>39%</b> | <b>A</b> |
|          | Val        | 35875         | 12%        | Ala        | 6799          | 4%         | Glu        | 41111         | 10%        | Gly        | 11008         | 5%         | <b>G</b> |

C1A codon usage pattern showed a bias towards AT-rich codons. Codon usage for the amino acids represented by only 2 codons (Phe, Tyr, His, Gln, Asn, Lys, Asp, Glu, and Cys) showed an apparent skew (70% or more) towards the AT-rich codon. Codon usage of Ile (represented by 3 codons) showed 90% usage skew to the 2 entirely AT-codons. Codon usage for amino acids represented by 4 codons (Val, Pro, Thr, Ala, and Gly) showed 80-90% usage of the 2 AT-rich codons (30-60% each). Arg and Leu (each represented by 6 codons) showed >50% usage skew to the codon with the highest AT content. And lastly, Ser (also represented by 6 codons) showed >80% usage to the 3 codons with the highest AT content.

Table S7. Transposable elements in the C1A genome.

| TE class | Number of occurrences in C1A genome | Total length (bp) | Percentage genome coverage |
|----------|-------------------------------------|-------------------|----------------------------|
| Class I  |                                     |                   |                            |
| LTR      |                                     |                   |                            |
| Copia    | 2482                                | 1,197,759         | 1.186                      |
| Gypsy    | 2752                                | 1,533,722         | 1.519                      |
| Pao      | 49                                  | 5,972             | 0.006                      |
|          |                                     |                   |                            |
| Non-LTR  |                                     |                   |                            |
| LINEs    |                                     |                   |                            |
| L1       | 77                                  | 38,441            | 0.038                      |
| L2       | 76                                  | 28,505            | 0.028                      |
| CR1      | 3                                   | 492               | 0.0005                     |
| Rex      | 8                                   | 3,937             | 0.004                      |
| RTE      | 157                                 | 40,204            | 0.040                      |
| RTE-X    | 545                                 | 214,720           | 0.213                      |
|          |                                     |                   |                            |
| Class II |                                     |                   |                            |
| hAT      | 9                                   | 1,926             | 0.002                      |
| MuDR     | 495                                 | 269,488           | 0.267                      |
| Polinton | 11                                  | 1,552             | 0.002                      |
|          |                                     |                   |                            |
| Total    | 6664                                | 3,336,718         | 3.307                      |
|          |                                     |                   |                            |

Table S8. Simple sequence repeats (SSRs) of the C1A genome

| Repeat Unit <sup>a</sup> |              | Genome         | cDNA  | Introns | Intergenic regions |
|--------------------------|--------------|----------------|-------|---------|--------------------|
| Mononucleotide           | Total number | 170937         | 1018  | 14073   | 155210             |
|                          | Total length | <b>3002239</b> | 11228 | 273549  | <b>2707450</b>     |
| Dinucleotide             | Total number | 40102          | 81    | 6794    | 32857              |
|                          | Total length | <b>678720</b>  | 1087  | 119492  | <b>551668</b>      |
| Trinucleotide            | Total number | 28346          | 2613  | 4023    | 21699              |
|                          | Total length | <b>874957</b>  | 59802 | 150661  | <b>666168</b>      |
| Tetranucleotide          | Total number | 7202           | 0     | 982     | 5833               |
|                          | Total length | <b>294312</b>  | 0     | 38817   | <b>240399</b>      |
| Pentanucleotide          | Total number | 1919           | 0     | 250     | 1565               |
|                          | Total length | <b>75356</b>   | 0     | 10395   | <b>60670</b>       |
| Hexanucleotide           | Total number | 688            | 79    | 72      | 529                |
|                          | Total length | <b>31411</b>   | 2960  | 3852    | <b>24447</b>       |
|                          |              |                |       |         |                    |
| Total number             |              | 249194         | 3791  | 26194   | 217693             |
| Total length             |              | <b>4956995</b> | 75077 | 596766  | 4250802            |

<sup>a</sup>: Mononucleotide with at least 10 repeats; dinucleotides with at least 6 repeats; tri-, tetra-, penta- and hexanucleotides with at least 5 repeats were identified.

Table S9. Classification of C1A genes with no hits in Mycota (with bacterial or eukaryal orthologs), and with no hits in Dikarya (with basal fungal lineages orthologs)

|                                                   | <b>Proteins with no hits in Mycota</b>       |                                             | <b>Proteins with no hits in Dikarya</b>         |
|---------------------------------------------------|----------------------------------------------|---------------------------------------------|-------------------------------------------------|
| <b>Protein classification</b>                     | <b>C1A proteins with bacterial orthologs</b> | <b>C1A proteins with eukaryal orthologs</b> | <b>C1A proteins with basal fungal orthologs</b> |
| <b>Proteins with Panther class</b>                |                                              |                                             |                                                 |
| Isomerase                                         | 3                                            | 0                                           | 0                                               |
| Ca-binding protein                                | 0                                            | 4                                           | 1                                               |
| Cell junction protein                             | 0                                            | 0                                           | 1                                               |
| Transmembrane receptor regulatory/adaptor protein | 0                                            | 1                                           | 1                                               |
| Defense/immunity protein                          | 6                                            | 4                                           | 2                                               |
| Cell adhesion molecule                            | 2                                            | 0                                           | 3                                               |
| Chaperone                                         | 2                                            | 1                                           | 4                                               |
| Signaling molecule                                | 0                                            | 4                                           | 4                                               |
| Transfer/carrier protein                          | 0                                            | 0                                           | 4                                               |
| Viral protein                                     | 3                                            | 11                                          | 4                                               |
| Structural protein                                | 0                                            | 0                                           | 8                                               |
| Oxidoreductase                                    | 4                                            | 9                                           | 9                                               |
| Extracellular matrix protein                      | 0                                            | 1                                           | 11                                              |
| Ligase                                            | 4                                            | 3                                           | 12                                              |
| Lyase                                             | 0                                            | 0                                           | 15                                              |
| Phosphatase                                       | 22                                           | 9                                           | 20                                              |
| Carbohydrate binding module                       | 6                                            | 5                                           | 21                                              |
| Protease                                          | 14                                           | 18                                          | 21                                              |
| Membrane traffic protein                          | 0                                            | 3                                           | 23                                              |
| Transferase                                       | 34                                           | 9                                           | 28                                              |
| Enzyme modulator                                  | 0                                            | 3                                           | 42                                              |
| Receptor                                          | 0                                            | 26                                          | 44                                              |
| Kinase                                            | 1                                            | 13                                          | 46                                              |
| Transcription factor                              | 0                                            | 5                                           | 48                                              |
| Nucleic acid-binding protein                      | 14                                           | 24                                          | 55                                              |
| Cytoskeletal protein                              | 0                                            | 8                                           | 82                                              |
| Hydrolase                                         | 91                                           | 13                                          | 112                                             |
| Transporter                                       | 63                                           | 9                                           | 244                                             |
| Unclassified                                      | 125                                          | 145                                         | 341                                             |
| <b>Hypothetical proteins</b>                      |                                              |                                             |                                                 |
|                                                   | 236                                          | 250                                         | 313                                             |

Table S10. Axoneme-associated proteins of strain C1A

| Axonemal protein                              | Subgroup/ Complex subunit | Gene ID/ IMG ID in Orpinomyces | Present in other basal fungi    |                                       |                                    | Present in Dikarya Fungi |
|-----------------------------------------------|---------------------------|--------------------------------|---------------------------------|---------------------------------------|------------------------------------|--------------------------|
|                                               |                           |                                | Allomyces macrogynus ATCC 38327 | Batrachochytrium dendrobatidis JEL423 | Spizellomyces punctatus DAOM BR117 |                          |
| <b>A. Structural components</b>               |                           |                                |                                 |                                       |                                    |                          |
| 1. Axonemal Dyneins                           | a. Heavy chain            | Orpinomyces_1566               | No                              | Yes                                   | No                                 | No                       |
|                                               |                           | Orpinomyces_16213              | No                              | Yes                                   | No                                 | No                       |
|                                               |                           | Orpinomyces_16306              | No                              | Yes                                   | No                                 | No                       |
|                                               |                           | Orpinomyces_16323              | No                              | Yes                                   | No                                 | No                       |
|                                               |                           | Orpinomyces_16325              | No                              | Yes                                   | No                                 | No                       |
|                                               |                           | Orpinomyces_16336              | No                              | Yes                                   | No                                 | No                       |
|                                               |                           | Orpinomyces_16341              | No                              | Yes                                   | No                                 | No                       |
|                                               |                           | Orpinomyces_16342              | Yes                             | Yes                                   | No                                 | No                       |
|                                               |                           | Orpinomyces_1737               | Yes                             | Yes                                   | Yes                                | No                       |
|                                               |                           | Orpinomyces_3254               | No                              | Yes                                   | No                                 | No                       |
|                                               |                           | Orpinomyces_4908               | No                              | No                                    | No                                 | No                       |
|                                               |                           | Orpinomyces_6405               | No                              | Yes                                   | No                                 | No                       |
|                                               | Orpinomyces_8404          | Yes                            | Yes                             | Yes                                   | No                                 |                          |
|                                               |                           |                                |                                 |                                       |                                    |                          |
|                                               | b. intermediate chain     | Orpinomyces_1377               | Yes                             | Yes                                   | Yes                                | No                       |
|                                               |                           |                                |                                 |                                       |                                    |                          |
|                                               | c. light chain            | Orpinomyces_6968               | Yes                             | Yes                                   | Yes                                | No                       |
| 2. Radial spokes                              |                           | Orpinomyces_11986              | Yes                             | Yes                                   | Yes                                | No                       |
|                                               |                           | Orpinomyces_12260              | Yes                             | Yes                                   | Yes                                | No                       |
|                                               |                           | Orpinomyces_9559               | Yes                             | Yes                                   | Yes                                | No                       |
| 3. Protein kinase A anchor protein            |                           | Orpinomyces_14681              | No                              | No                                    | No                                 | No                       |
| 4. Ribbon Rib43A                              |                           | Orpinomyces_6911               | Yes                             | Yes                                   | Yes                                | No                       |
| 5. Nexin-Dynein regulatory complex components |                           | Orpinomyces_3201               | No                              | Yes                                   | Yes                                | No                       |
|                                               |                           | Orpinomyces_7282               | Yes                             | Yes                                   | Yes                                | No                       |

|                                               |                               |                   |     |     |     |    |
|-----------------------------------------------|-------------------------------|-------------------|-----|-----|-----|----|
| 6. Outer dynein arm docking complex component | protein 1                     | Orpinomyces_8906  | Yes | Yes | Yes | No |
| 7. Basal body assembly                        | a. B9 protein                 | Orpinomyces_9350  | Yes | Yes | Yes | No |
|                                               |                               | Orpinomyces_8512  | Yes | Yes | Yes | No |
|                                               |                               |                   |     |     |     |    |
|                                               | b. Meckelin                   | Orpinomyces_8276  | No  | No  | Yes | No |
|                                               |                               |                   |     |     |     |    |
|                                               | c. FOP dimerization domain    | Orpinomyces_12637 | No  | No  | No  | No |
|                                               |                               |                   |     |     |     |    |
|                                               | d. Cep290                     | Orpinomyces_14841 | Yes | Yes | Yes | No |
|                                               |                               |                   |     |     |     |    |
| <b>B. IFT components</b>                      |                               |                   |     |     |     |    |
| 1. Kinesin II                                 | a. heterotrimeric             | Orpinomyces_13919 | Yes | Yes | Yes | No |
|                                               |                               | Orpinomyces_6530  | Yes | Yes | Yes | No |
|                                               | b. Kinesin-associated protein | Orpinomyces_2434  | Yes | Yes | Yes | No |
| 2. Cytoplasmic Dynein 2                       | a. heavy chain                | Orpinomyces_3946  | No  | No  | No  | No |
|                                               |                               | Orpinomyces_16341 | No  | No  | No  | No |
|                                               |                               |                   |     |     |     |    |
|                                               | b. intermediate chain         | Orpinomyces_2387  | No  | Yes | Yes | No |
|                                               |                               |                   |     |     |     |    |
|                                               | c. Light intermediate chain   | Orpinomyces_904   | Yes | Yes | Yes | No |
|                                               |                               |                   |     |     |     |    |
|                                               | d. light chain                | Orpinomyces_10954 | Yes | Yes | Yes | No |
| 3. IFT complex A                              | a. IFT144 (WDR19)             | Orpinomyces_913   | Yes | Yes | Yes | No |
|                                               | b. IFT140                     | Orpinomyces_7315  | Yes | Yes | Yes | No |
|                                               | c. IFT139                     | Orpinomyces_2300  | No  | Yes | Yes | No |
|                                               | d. IFT122 (WDR10)             | Orpinomyces_9214  | Yes | Yes | Yes | No |
|                                               |                               | Orpinomyces_15334 | Yes | Yes | Yes | No |

|                                  |                                   |                   |     |     |     |     |
|----------------------------------|-----------------------------------|-------------------|-----|-----|-----|-----|
|                                  | e. IFT121 (WDR35)                 | 2510866969        | Yes | Yes | Yes | No  |
| 4. IFT complex B                 | a. OSM-1 (IFT172)                 | Orpinomyces_2822  | No  | Yes | Yes | No  |
|                                  | b. IFT88                          | Orpinomyces_5343  | Yes | Yes | Yes | No  |
|                                  | c. IFT46                          | Orpinomyces_5553  | Yes | Yes | Yes | No  |
|                                  | d. IFT57                          | Orpinomyces_1988  | Yes | Yes | Yes | No  |
|                                  | e. IFT81                          | Orpinomyces_3636  | Yes | Yes | Yes | No  |
|                                  | f. IFT80 (WDR56, CHE-2)           | Orpinomyces_2046  | Yes | Yes | Yes | No  |
|                                  | g. IFT74                          | Orpinomyces_4472  | Yes | Yes | Yes | No  |
|                                  | h. IFT70                          | Orpinomyces_15501 | Yes | Yes | Yes | No  |
|                                  | i. IFT54                          | Orpinomyces_12967 | No  | Yes | Yes | No  |
|                                  | j. IFT52                          | Orpinomyces_7475  | Yes | Yes | Yes | No  |
|                                  | k. IFT27 (RABL4)                  | 2510863227        | Yes | Yes | Yes | Yes |
|                                  | l. IFT25 (HSP- $\beta$ 11)        | 2510867340        | No  | Yes | Yes | No  |
|                                  | m. IFT22 (RABL5)                  | 2510862755        | Yes | Yes | Yes | Yes |
|                                  | n. IFT20                          | 2510856885        | No  | Yes | Yes | No  |
| 5. IFT complex A accessory       | Tub family                        | Orpinomyces_15294 | No  | Yes | Yes | No  |
| 6. IFT complex B accessory       | a. Clusterin-associated protein 1 | Orpinomyces_10037 | Yes | Yes | Yes | No  |
|                                  | b. DYF-13 (TTC26)                 | Orpinomyces_5282  | Yes | Yes | Yes | No  |
|                                  |                                   | Orpinomyces_4873  | Yes | Yes | Yes | No  |
| 7. Bardet-Biedl syndrome complex | a. BBS1                           | Orpinomyces_13448 | No  | No  | No  | No  |
|                                  | b. BBS2                           | Orpinomyces_12482 | No  | No  | No  | No  |
|                                  | c. BBS4                           | Orpinomyces_12384 | No  | No  | No  | No  |
|                                  | d. BBS5                           | 2510866654        | No  | No  | No  | No  |
|                                  | e. BBS7                           | Orpinomyces_8448  | No  | No  | No  | No  |
|                                  | f. BBS8                           | Orpinomyces_2072  | No  | No  | No  | No  |
|                                  | g. BBS9                           | Orpinomyces_12104 | No  | No  | No  | No  |

1

2

Table S11. Protease inhibitors in the C1A genome

| Gene ID           | Inhibitor family | Merops accession number | E-value  | Annotation/ domains                                                                                                      | Presence in other fungi                                                                                                                                                                                                                                                                                                                                                                                                                                                                                                   |
|-------------------|------------------|-------------------------|----------|--------------------------------------------------------------------------------------------------------------------------|---------------------------------------------------------------------------------------------------------------------------------------------------------------------------------------------------------------------------------------------------------------------------------------------------------------------------------------------------------------------------------------------------------------------------------------------------------------------------------------------------------------------------|
| Orpinomyces_14234 | I04              | MER018696               | 2.50E-39 | serpin                                                                                                                   | <i>Piromyces</i> sp. E2                                                                                                                                                                                                                                                                                                                                                                                                                                                                                                   |
| Orpinomyces_6138  |                  | MER018662               | 4.20E-38 | IPR000215 Protease inhibitor I4, serpin<br>IPR002883 Dockerin cellulose-binding<br>IPR009034 Dockerin, cellulose docking | <i>Piromyces</i> sp. E2                                                                                                                                                                                                                                                                                                                                                                                                                                                                                                   |
| Orpinomyces_2311  |                  | MER018662               | 6.00E-35 | IPR000215 Protease inhibitor I4, serpin<br>IPR002883 Dockerin cellulose-binding<br>IPR009034 Dockerin, cellulose docking | <i>Piromyces</i> sp. E2                                                                                                                                                                                                                                                                                                                                                                                                                                                                                                   |
| Orpinomyces_14684 |                  | MER019039               | 1.90E-12 | serpin                                                                                                                   | <i>Piromyces</i> sp. E2                                                                                                                                                                                                                                                                                                                                                                                                                                                                                                   |
| Orpinomyces_4452  | I32              | MER023234               | 6.60E-10 | KOG1101 - Apoptosis inhibitor IAP1 and related BIR domain proteins                                                       | <i>Coccidioides immitis</i> RS, <i>Coccidioides posadasii</i> C735 delta SOWgp, <i>Coprinopsis cinerea</i> okayama7#130, <i>Fusarium oxysporum</i> lycopersici FGSC 4286, <i>Gibberella zeae</i> PH-1, <i>Nosema ceranae</i> BRL01, <i>Phanerochaete chrysosporium</i> RP-78, <i>Saccharomyces cerevisiae</i> AWRI1631, <i>Saccharomyces cerevisiae</i> YJM789, <i>Saitoella complicata</i> NRRL Y-17804, <i>Scheffersomyces stipitis</i> CBS 6054, <i>Spizellomyces punctatus</i> DAOM BR117, <i>Ustilago maydis</i> 521 |
| 2510865883        | I42              | MER090314               | 6.10E-11 | Chagasin                                                                                                                 | <i>Allomyces macrogynus</i> ATCC 38327                                                                                                                                                                                                                                                                                                                                                                                                                                                                                    |
| 2510871764        |                  | MER090314               | 2.60E-10 | Chagasin                                                                                                                 | None                                                                                                                                                                                                                                                                                                                                                                                                                                                                                                                      |
| 2510864005        |                  | MER047972               | 1.80E-09 | Chagasin                                                                                                                 | None                                                                                                                                                                                                                                                                                                                                                                                                                                                                                                                      |



Table S12. C1A proteins involved in hydrogenosomal protein import and their closest relatives in the nr database.

| Gene ID/ IMG ID   | Protein product                                             | Phylogenetic affiliation of Blastp first hit | Taxonomy of first hit |
|-------------------|-------------------------------------------------------------|----------------------------------------------|-----------------------|
| 2510863710        | MIA complex componet; FAD dependent sulfhydryl oxidase Erv1 | <i>Yarrowia lipolytica</i>                   | Fungi                 |
| 2510870272        | MIA complex componet; MIA40                                 | <i>Yarrowia lipolytica</i>                   | Fungi                 |
| Orpinomyces_10445 | Presequence Translocase-Associated Motor component Mge1     | <i>Branchiostoma floridae</i>                | Chordata              |
| 2510866045        | Presequence Translocase-Associated Motor component mtHSP70  | <i>Neocallimastix patriciarum</i>            | Fungi                 |
| 2510871141        | Presequence Translocase-Associated Motor component mtHSP70  | <i>Neocallimastix patriciarum</i>            | Fungi                 |
| 2510859873        | Presequence Translocase-Associated Motor component PAM16    | <i>Lachancea thermotolerans</i>              | Fungi                 |
| 2510856302        | Presequence Translocase-Associated Motor component PAM18    | <i>Drosophila erecta</i>                     | Arthropoda            |
| 2510870846        | Presequence Translocase-Associated Motor component TIM44    | <i>Schizophyllum commune</i> H4-8            | Fungi                 |
| 2510863027        | SAM complex component; MDM10                                | <i>Batrachochytrium dendrobatidis</i> JAM81  | Fungi                 |
| Orpinomyces_12490 | SAM complex component; MDM12                                | <i>Aspergillus nidulans</i> FGSCA4           | Fungi                 |
| Orpinomyces_12567 | SAM complex component; Mim1                                 | <i>Tuber melanosporum</i> Mel28              | Fungi                 |
| Orpinomyces_9000  | SAM complex component; Mim1                                 | <i>Laccaria bicolor</i> S238N-H82            | Fungi                 |
| Orpinomyces_593   | SAM complex component; Sam37                                | <i>Acaryochloris marina</i> MBIC11017        | Cyanobacteria         |
| Orpinomyces_2572  | SAM complex component; SAM50                                | <i>Tuber melanosporum</i> Mel28              | Fungi                 |
| 2510854209        | small TIM; TIM10A                                           | <i>Lachancea thermotolerans</i>              | Fungi                 |
| 2510854209        | small TIM; TIM12                                            | <i>Lachancea thermotolerans</i>              | Fungi                 |
| Orpinomyces_7065  | small TIM; TIM9A                                            | <i>Laccaria bicolor</i> S238N-H82            | Fungi                 |
| 2510867063        | TIM22 complex component; TIM18                              | <i>Tuber melanosporum</i> Mel28              | Fungi                 |
| 2510867256        | TIM22 complex component; TIM18                              | <i>Tuber melanosporum</i> Mel28              | Fungi                 |
| Orpinomyces_1577  | TIM22 complex component; TIM22                              | <i>Tuber melanosporum</i> Mel28              | Fungi                 |
| 2510862636        | TIM22 complex component; TIM54                              | <i>Trichophyton rubrum</i> CBS 118892        | Fungi                 |
| 2510859920        | TIM23 complex component; TIM17                              | <i>Nematostella vectensis</i>                | Cnidaria              |
| 2510874415        | TIM23 complex component; TIM23                              | <i>Candida dubliniensis</i> CD36             | Fungi                 |
| Orpinomyces_9320  | TIM23 complex component; TIM50                              | <i>Coprinopsis cinerea</i> okayama7#130      | Fungi                 |
| 2510851173        | TOM complex component; TOM20                                | <i>Coprinopsis cinerea</i> okayama7#130      | Fungi                 |
| Orpinomyces_10011 | TOM complex component; TOM20                                | <i>Coprinopsis cinerea</i> okayama7#130      | Fungi                 |
| Orpinomyces_5414  | TOM complex component; TOM22                                | <i>Ustilago maydis</i> 521                   | Fungi                 |
| Orpinomyces_14168 | TOM complex component; TOM40                                | <i>Zea mays</i>                              | Plantae               |
| 2510863838        | TOM complex component; TOM70                                | <i>Schizophyllum commune</i> H4-8            | Fungi                 |

Table S13. Hydrogenosomal proteins of strain C1A.

| Gene ID/ IMG ID   | Product name                                                                           | Pre-sequence (motif search)/ or Mitoprot cleavable sequence | Mitoprot prob | Comments                                                                                                                                                                  |
|-------------------|----------------------------------------------------------------------------------------|-------------------------------------------------------------|---------------|---------------------------------------------------------------------------------------------------------------------------------------------------------------------------|
| Orpinomyces_2862  | chaperonin GroEL                                                                       | MLSAQRSL                                                    | 0.996         | Predicted using N-terminal sequence motifs then checked in mitoprot for probability of hydrogenosomal export. Pre sequences with W were removed. Motif sequence is shown. |
| Orpinomyces_10370 | hypothetical protein                                                                   | MSFFLFDDPIKESERSI                                           | 0.61          |                                                                                                                                                                           |
| 2510855668        | NADPH:quinone reductase and related Zn-dependent oxidoreductases                       | MLSSQTLIKNALARGI                                            | 0.996         |                                                                                                                                                                           |
| 2510859021        | Cytosine deaminase FCY1 and related enzymes                                            | MLEITKESTQFMREA                                             | 0.744         |                                                                                                                                                                           |
| 2510859416        | hypothetical protein                                                                   | MLFLLSATTRSI                                                | 0.73          |                                                                                                                                                                           |
| 2510861873        | Peptidase S26B, eukaryotic signal peptidase                                            | MLLNSLFPGKTNREI                                             | 0.63          |                                                                                                                                                                           |
| Orpinomyces_5115  | hypothetical protein                                                                   | MLQKIIRNKLGLCLVALVLTPRSL                                    | 0.73          |                                                                                                                                                                           |
| Orpinomyces_8225  | hypothetical protein                                                                   | MSLFNKIDRAFG                                                | 0.66          |                                                                                                                                                                           |
| 2510865002        | hypothetical protein                                                                   | MLYNRRFS                                                    | 0.68          |                                                                                                                                                                           |
| 2510865887        | hypothetical protein                                                                   | MLYKKNIRNL                                                  | 0.595         |                                                                                                                                                                           |
| 2510866001        | Galactose binding lectin domain, D-galactoside/L-rhamnose binding SUEL lectin domain   | MSLKNAMITFNKIKRGA                                           | 0.97          |                                                                                                                                                                           |
| 2510868169        | ATPases involved in chromosome partitioning, nucleotide-binding.                       | MLRGF                                                       | 0.898         |                                                                                                                                                                           |
| 2510869114        | Predicted ATPase, nucleotide-binding                                                   | MLRGF/ 0.95                                                 | 0.82          |                                                                                                                                                                           |
| Orpinomyces_15932 | SH3 domain.                                                                            | MLRNSQNSTASSRSS                                             | 0.97          |                                                                                                                                                                           |
| Orpinomyces_16041 | Ca <sup>2+</sup> -binding actin-bundling protein fimbrin/plastin (EF-Hand superfamily) | MLAQRRIIFS                                                  | 0.87          |                                                                                                                                                                           |
| 2510872772        | Guanine-nucleotide releasing factor                                                    | MLSRNI                                                      | 0.68          |                                                                                                                                                                           |

|                   |                                                                                                                            |                                                       |       |                                                                                                                         |
|-------------------|----------------------------------------------------------------------------------------------------------------------------|-------------------------------------------------------|-------|-------------------------------------------------------------------------------------------------------------------------|
| 2510873335        | Casein kinase (serine/threonine/tyrosine protein kinase)                                                                   | MLRSI                                                 | 0.7   |                                                                                                                         |
| 2510873379        | Casein kinase (serine/threonine/tyrosine protein kinase)                                                                   | MLRSI                                                 | 0.7   |                                                                                                                         |
| Orpinomyces_15557 | dihydroxy-acid dehydratase, Dihydroxy-acid/6-phosphogluconate dehydratase, Aconitase/3-isopropylmalate dehydratase, swivel | MSLANIVAKRSL                                          | 0.94  |                                                                                                                         |
| 2510874047        | acetolactate synthase, large subunit, biosynthetic type                                                                    | MLSNTVKRSI                                            | 0.996 |                                                                                                                         |
| 2510874400        | [FeFe] hydrogenase, group A                                                                                                | MLSSVLNKASANPKLTRSL                                   | 0.94  |                                                                                                                         |
|                   |                                                                                                                            |                                                       |       |                                                                                                                         |
| 2510870853        | cysteine desulfurase                                                                                                       | MQSLISNSIKSSIRLPTLSTVVGKLGINQLKPTLFNSVRTFSRTSLTK      | 0.98  | Enzymes of Fe-S cluster assembly. Probability predicted using mitoprot. Mitoprot predicted cleavable sequence is shown. |
| Orpinomyces_2766  | iron-sulfur cluster assembly enzyme ISCU, mitochondrial-like                                                               | MNTLLNIAKPALVNSFKVQATRIIGTSTLNA                       | 0.61  |                                                                                                                         |
| 2510861454        | YAH1; mitochondrial matrix iron-sulfur protein                                                                             | not predictable                                       | 0.99  |                                                                                                                         |
| 2510864168        | frataxin, mitochondrial-like                                                                                               | not predictable                                       | 0.72  |                                                                                                                         |
| 2510856721        | iron-sulfur cluster assembly protein IscA                                                                                  | not predictable                                       | 0.84  |                                                                                                                         |
|                   |                                                                                                                            |                                                       |       |                                                                                                                         |
| Orpinomyces_10445 | MGE1; mitochondrial grpE-type co-chaperone of the HSP70 system                                                             | not predictable                                       | 0.93  | Chaperones and co-chaperones. Probability predicted using mitoprot. Mitoprot predicted cleavable sequence is shown.     |
| Orpinomyces_9602  | chaperonin GroEL, heat shock 60kDa protein 1                                                                               | not predictable                                       | 0.78  |                                                                                                                         |
| 2510860701        | chaperonin GroES, heat shock 10kDa protein 1                                                                               | MFNSLVTRVNPVKMSLRF                                    | 0.74  |                                                                                                                         |
| Orpinomyces_10834 | mDj10; DnaJ homolog subfamily B member 12                                                                                  | MSSQITNSIPKVQAIVNASLINQAHAHVSPVSNRLNLHNSVKLNG<br>KRNY | 0.92  |                                                                                                                         |
|                   |                                                                                                                            |                                                       |       |                                                                                                                         |

|                   |                                                                 |                                     |       |                                                                                                                                 |
|-------------------|-----------------------------------------------------------------|-------------------------------------|-------|---------------------------------------------------------------------------------------------------------------------------------|
| Orpinomyces_1920  | mitochondrial processing peptidase, beta                        | not predictable                     | 0.87  | Mitochondrial peptidases. Mitoprot predicted cleavable sequence is shown.                                                       |
| 2510858001        | mitochondrial intermediate peptidase                            | not predictable                     | 0.69  |                                                                                                                                 |
| 2510870042        | Mitochondrial matrix Mmp37                                      | not predictable                     | 0.74  | Mitochondrial matrix proteins. Probability predicted using mitoprot.                                                            |
| 2510862602        | succinate dehydrogenase, (ubiquinone) flavoprotein subunit      | not predictable                     | 0.83  | Enzymes of pyruvate and energy metabolism. Probabilty predicted using mitoprot. Mitoprot predicted cleavable sequence is shown. |
| 2510867063        | succinate dehydrogenase (ubiquinone) membrane anchor subunit    | MEIVNSNCGISNIRKIGSSILNS             | 0.67  |                                                                                                                                 |
| Orpinomyces_7860  | NADH dehydrogenase (ubiquinone) flavoprotein 1                  | not predictable                     | 0.96  |                                                                                                                                 |
| 2510857800        | malate dehydrogenase (oxaloacetate-decarboxylating)(NADP+)      | MSTFNLIRNPLSNRG                     | 0.692 |                                                                                                                                 |
| Orpinomyces_15581 | malate dehydrogenase (oxaloacetate-decarboxylating)(NADP+)      | MLAPIQTIARP                         | 0.685 |                                                                                                                                 |
| 2511052008        | Pyruvate-formate lyase                                          | not predictable                     | 0.87  |                                                                                                                                 |
| Orpinomyces_7905  | Acetyl-CoA hydrolase                                            | MQALSNNLVKKTTFSGCQRGLASMSEAI        | 0.7   |                                                                                                                                 |
| 2510848938        | Succinyl-CoA synthetase, alpha subunit                          | MISNQVSSSAKVAASAVSKRLY              | 0.89  |                                                                                                                                 |
| 2510871091        | Succinyl-CoA synthetase, beta subunit                           | MLANVTRSTSKAAPALASIAQTAQKRFLSVHEYCS | 0.94  |                                                                                                                                 |
| Orpinomyces_9924  | Putative NADPH-quinone reductase (modulator of drug activity B) | not predictable                     | 0.89  |                                                                                                                                 |
| 2510867741        | enoyl-[acyl carrier protein] reductase II                       | not predictable                     | 0.87  |                                                                                                                                 |
| 2510860831        | Palmitoyl protein thioesterase                                  | MKFNKFFIASFLIEASLAAKTLSPKYRP        | 0.61  |                                                                                                                                 |

1

Table S14. CIA proteins involved in Fe-S protein biogenesis.

| Gene ID/ IMG ID                           | Protein product                                              | Comment                                                                             |
|-------------------------------------------|--------------------------------------------------------------|-------------------------------------------------------------------------------------|
| <b>Mitochondrial ISC machinery</b>        |                                                              |                                                                                     |
| Orpinomyces_2048                          | Mrs3/4 (ferrous iron transporter)                            | Fe <sup>2+</sup> import                                                             |
| 2510870853                                | cysteine desulfurase NifS                                    | Early ISC machinery. The genome lacks a homologue of Isd11. NifS is bacterial like. |
| Orpinomyces_2766                          | iron-sulfur cluster assembly enzyme ISCU, mitochondrial-like |                                                                                     |
| Orpinomyces_3968                          | YAH1; mitochondrial matrix iron-sulfur protein               |                                                                                     |
| 2510864168                                | frataxin, mitochondrial-like                                 |                                                                                     |
| 2510856721                                | iron-sulfur cluster assembly protein IscA                    |                                                                                     |
| 2510856721                                | Fe-S cluster biosynthesis protein ISA1                       |                                                                                     |
| 2510870984                                | Mitochondrial Fe-S cluster biosynthesis protein ISA2         |                                                                                     |
| 2510871141,<br>2510866045                 | Mitochondrial Hsp70, Ssq1                                    | Late ISC machinery                                                                  |
| 2510855272                                | Fe-S protein assembly co-chaperone; Jac1                     |                                                                                     |
| Orpinomyces_10445                         | nucleotide exchange factor; Mge1                             |                                                                                     |
| 2510859344                                | Monothiol glutaredoxin, Grx4                                 |                                                                                     |
| <b>Mitochondrial ISC export machinery</b> |                                                              |                                                                                     |
| Orpinomyces_11214,<br>Orpinomyces_6161    | Mitochondrial Fe/S cluster exporter Atm1, ABC superfamily    | GSH aids in export of an unknown compound.                                          |
| 2510863710                                | FAD dependent sulfhydryl oxidase Erv1                        |                                                                                     |
| <b>Cytosolic CIA machinery</b>            |                                                              |                                                                                     |
| 2510866123                                | P-loop containing nucleoside triphosphate hydrolases, Cfd1   | Assembly and maturation of cytosolic Fe/S proteins.                                 |
| 2510867391                                | P-loop containing nucleoside triphosphate hydrolases, Nbp35  |                                                                                     |
| Orpinomyces_13712                         | Nuclear architecture related protein, Nar-1                  |                                                                                     |
| Orpinomyces_10332                         | WD40 repeat protein Cia1                                     |                                                                                     |

2

Table S15. Transporters of strain C1A.

| Classification                                        | Superfamily/ Family                                                                                            | Number in transcriptome | Number in genome | Comments                                                                                                                                                                                                                                                                                                                                                                    |
|-------------------------------------------------------|----------------------------------------------------------------------------------------------------------------|-------------------------|------------------|-----------------------------------------------------------------------------------------------------------------------------------------------------------------------------------------------------------------------------------------------------------------------------------------------------------------------------------------------------------------------------|
| <b>1. ATP-dependent (primary active) transporters</b> | The ATP-binding Cassette [ABC] Superfamily                                                                     | 211                     | 103              | Carbohydrate uptake , polar aa uptake, cellobiose and cellooligosaccharide uptake, Fe-chelate uptake, siderophore-Fe uptake, drug exporters, acetate exporter, multidrug resistance exporter (short chain FA phosphatidyl choline flippase), peroxisomal LCFA-CoA transporter, drug-conjugate transporter, heavy metal transporter, mitochondrial Fe-S cluster transporter. |
|                                                       | The H <sup>+</sup> - or Na <sup>+</sup> -translocating F-type, V-type and A-type ATPase [F-ATPase] Superfamily | 10                      | 4                | H <sup>+</sup> -translocating V-type ATPase, and vacuolar V-type ATPase                                                                                                                                                                                                                                                                                                     |
|                                                       | The P-type ATPase [P-ATPase] Superfamily                                                                       | 70                      | 7                | Vacuolar Ca uptake, Golgi Ca, Mn efflux, ER Ca:H <sup>+</sup> antiporter, Ag ATPase, Cu ATPase, Golgi PS, PE translocase, PL uptake flippase, Inwardly directed PL and Lyso-PL flippase, Inwardly directed PC, PS, Lyso-PE flippase at the Plasma membrane involved in endocytosis, K <sup>+</sup> ATPase efflux, ER ATPase transporting PL                                 |
| <b>2. Ion channels/ pores</b>                         | The Major Intrinsic Protein [MIP] Family                                                                       | 1                       | 1                | Water transporter positively regulated by PKA and PKC phosphorylation                                                                                                                                                                                                                                                                                                       |
|                                                       | The Large Conductance Mechanosensitive Ion Channel [MscL] Family                                               | 2                       | 1                | Non-selective ion transport (slight bias for cations over anions)                                                                                                                                                                                                                                                                                                           |
|                                                       | The Small Conductance Mechanosensitive Ion Channel [MscS] Family                                               | 2                       | 0                | Osmolyte efflux channel                                                                                                                                                                                                                                                                                                                                                     |
|                                                       | The Transient Receptor Potential Ca <sup>2+</sup> Channel [TRP-CC] Family                                      | 100                     | 85               | Subfamilies C, V, A                                                                                                                                                                                                                                                                                                                                                         |
|                                                       | The Voltage-gated Ion Channel [VIC] Superfamily                                                                | 34                      | 15               | Sodium, potassium, calcium, or non-selective                                                                                                                                                                                                                                                                                                                                |
|                                                       | The Mitochondrial and Plastid Porin [MPP] Family                                                               | 2                       | 1                | VDAC large conductance chloride channel                                                                                                                                                                                                                                                                                                                                     |

|                                  |                                                                                                   |   |   |                                                                                                        |
|----------------------------------|---------------------------------------------------------------------------------------------------|---|---|--------------------------------------------------------------------------------------------------------|
|                                  | The CorA Metal Ion Transporter [MIT] Family                                                       | 1 | 0 | Al and Mn resistance                                                                                   |
|                                  | The Ammonia Transporter Channel [Amt] Family                                                      | 6 | 5 | Ammonia uniporter both high and low affinity transporter                                               |
|                                  |                                                                                                   |   |   |                                                                                                        |
| <b>3. Secondary transporters</b> | The Alanine or Glycine:Cation Symporter [AGCS] Family                                             | 1 | 1 | Ala:Na symporter                                                                                       |
|                                  | The Amino Acid-Polyamine-Organocation [APC] Family                                                | 2 | 2 | Cystine transporter                                                                                    |
|                                  | The Amino Acid/Auxin Permease [AAAP] Family                                                       | 8 | 5 | Symport with proton. Large neutral AA, glutamine, acidic AA.                                           |
|                                  | The Arsenite-Antimonite [ArsB] Efflux Family                                                      | 1 | 1 | Plasma membrane silicate efflux pump                                                                   |
|                                  | The Bile Acid:Na <sup>+</sup> Symporter [BASS] Family                                             | 1 | 0 | Organic anion:Na symporter                                                                             |
|                                  | The Ca <sup>2+</sup> :Cation Antiporter [CaCA] Family                                             | 4 | 1 | Ca extrusion. Vacuolar Ca or Mn:H <sup>+</sup> antiporter, K <sup>+</sup> -dependent Ca:Na antiporter. |
|                                  | The Cation Diffusion Facilitator [CDF] Family                                                     | 8 | 2 | Heavy metal:proton or K <sup>+</sup> antiporter. Zn and Mn                                             |
|                                  | The Dicarboxylate/Amino Acid:Cation [Na <sup>+</sup> or H <sup>+</sup> ] Symporter [DAACS] Family | 2 | 2 | Asp:Na symporter, Ser/Thr:Na symporter                                                                 |
|                                  | The Divalent Anion:Na <sup>+</sup> Symporter [DASS] Family                                        | 5 | 0 | Vacuolar PO <sub>4</sub> transporter, oxoglutarate:malate antiporter, tartarate:succinate antiporetr   |

|                                                                  |    |    |                                                                                                                                                                                                                                                                                                                                                                                                                                                                                                                                                                                                                   |
|------------------------------------------------------------------|----|----|-------------------------------------------------------------------------------------------------------------------------------------------------------------------------------------------------------------------------------------------------------------------------------------------------------------------------------------------------------------------------------------------------------------------------------------------------------------------------------------------------------------------------------------------------------------------------------------------------------------------|
| The Drug/Metabolite Transporter [DMT] Superfamily                | 23 | 7  | Small multidrug resistance family (heterooligomeric drug efflux pump), triose phosphate transporter family (PEP), UDP-N-acetylglucosamine:UMP antiporter family (bifunctional Golgi nucleotide-sugar transporter), UDP-gal:UMP antiporter family (UDP-gal/UDP-glu:UDP antiporter in Golgi), CMP-sialate:UMP antiporter family (Golgi UDP-gal and UDP-NAcGal:UDP antiporter, Golgi UDP-NAcGlu transporter, ER/Golgi UDP-NAcGal/UDP-NAcGlu transporter), GDP-mannose:GMP antiporter family (Golgi GDP-mannose transporter), GDP-fucose transporter family, Thiamine PP transporter family (DUF6 domain transporter) |
| The Equilibrative Nucleoside Transporter [ENT] Family            | 1  | 1  | Nucleoside transporters high and low affinity.                                                                                                                                                                                                                                                                                                                                                                                                                                                                                                                                                                    |
| The Formate-Nitrite Transporter [FNT] Family                     | 1  | 1  | Formate uptake permease                                                                                                                                                                                                                                                                                                                                                                                                                                                                                                                                                                                           |
| The Glycoside-Pentoside-Hexuronide [GPH]:Cation Symporter Family | 12 | 7  | Symport with proton or sodium                                                                                                                                                                                                                                                                                                                                                                                                                                                                                                                                                                                     |
| The Lysosomal Cystine Transporter [LCT] Family                   | 1  | 0  | Suppressor of the Lec15/Lec35 glycosylation mutation. Influence retention of luminal ER proteins and glycosylation in Golgi.                                                                                                                                                                                                                                                                                                                                                                                                                                                                                      |
| The Major Facilitator Superfamily [MFS]                          | 84 | 52 | Sugar:H <sup>+</sup> symporter, sugar uniporter, drug:H <sup>+</sup> antiporter, efflux pumps, polyol:H <sup>+</sup> symporter, nucleoside:H <sup>+</sup> symporter, amino acid uniporter, purine uniporter, oxalate:formate antiporter, acetyl-CoA:CoA antiporter.                                                                                                                                                                                                                                                                                                                                               |
| The Mitochondrial Carrier [MC] Family                            | 26 | 7  | ADP:ATP translocasr, hydrogenosomal ADP/ATP carrier, oxidocarboxylate carrier (C5-C7), Mitochondrial pH dependent Fe import, carnitine/acylcarnitine translocase, Ornithine/Arg carrier, mitochondrial folate transporter, dNDP transporter, peroxisomal ADP/AMP/ATP antiporter, citrate/oxoglutarate carrier, SAM importer.                                                                                                                                                                                                                                                                                      |



|                                                                                |     |     |                                                                                                            |
|--------------------------------------------------------------------------------|-----|-----|------------------------------------------------------------------------------------------------------------|
| The Monovalent Cation:Proton Antiporter-1 [CPA1] Family                        | 2   | 1   | Na or K:H <sup>+</sup> antiporter                                                                          |
| The Monovalent Cation:Proton Antiporter-2 [CPA2] Family                        | 2   | 0   | K <sup>+</sup> :H <sup>+</sup> antiporter                                                                  |
| The Multidrug/Oligosaccharidyl-lipid/Polysaccharide [MOP] Flippase Superfamily | 13  | 9   | Multiantimicrobial extrusion family (drug:Na antiporters), oligosaccharidyl-lipid flippase (Rft protein)   |
| The Neurotransmitter:Sodium Symporter [NSS] Family                             | 5   | 3   | Tryptophan:Na symporter                                                                                    |
| The NhaC Na <sup>+</sup> :H <sup>+</sup> Antiporter [NhaC] Family              | 4   | 2   | Na <sup>+</sup> :H <sup>+</sup> antiporter, Lysine transporter                                             |
| The Proton-dependent Oligopeptide Transporter [POT] Family                     | 5   | 1   | Di or tripeptide:H <sup>+</sup> symporter, cationic, neutral, and anionic peptide:H <sup>+</sup> symporter |
| The Solute:Sodium Symporter [SSS] Family                                       | 1   | 1   | Proline:Na symporter                                                                                       |
| The Sulfate Permease [SulP] Family                                             | 6   | 1   | Sulfate transporter, HCO <sub>3</sub> :Cl exchange antiporter                                              |
| The Zinc [Zn <sup>2+</sup> ]-Iron [Fe <sup>2+</sup> ] Permease [ZIP] Family    | 11  | 9   | Uptake dependent on proton motive force                                                                    |
| The Inorganic Phosphate Transporter [PiT] Family                               | 0   | 1   | Inorganic phosphate uptake coupled to Na symport                                                           |
| The Chloride Carrier/Channel [ClC] Family                                      | 6   | 2   | ClC voltage-gated Cl channel, intracellular endosomal Cl:H <sup>+</sup> antiporter                         |
| <b>Total number</b>                                                            | 668 | 339 |                                                                                                            |

1

2

Table S16. Sugar transporters of strain C1A

| Family ID                                           | Gene ID /IMG ID   | Sugar transported            | Type of transport      | Organismal type | BLAST result |                                       |
|-----------------------------------------------------|-------------------|------------------------------|------------------------|-----------------|--------------|---------------------------------------|
|                                                     |                   |                              |                        |                 | E-value      | First hit phylogeny                   |
| <b>I. Secondary transporters</b>                    |                   |                              |                        |                 |              |                                       |
| <b>A. Major facilitator superfamily MFS (2.A.1)</b> |                   |                              |                        |                 |              |                                       |
| <b>1. Subfamily (2.A.1.1) Sugar porters</b>         |                   |                              |                        |                 |              |                                       |
| 2.A.1.1.1                                           | 2511051723        | Galactose, xylose            | H <sup>+</sup> symport | Bacteria        | 2.00E-11     | <i>Escherichia coli O6</i>            |
|                                                     | 2510859213        |                              |                        |                 | 2.00E-19     | <i>Bacillus subtilis</i>              |
| 2.A.1.1.2                                           | Orpinomyces_2349  | Arabinose, galactose, xylose | H <sup>+</sup> symport | Bacteria        | 7.00E-15     | <i>Escherichia coli O157:H7</i>       |
| 2.A.1.1.3                                           | 2511056457        | Xylose                       | H <sup>+</sup> symport | Bacteria        | 1.00E-122    | <i>Escherichia coli O157:H7</i>       |
|                                                     | 2510870695        |                              |                        |                 | 2.00E-120    | <i>Escherichia coli O157:H7</i>       |
| 2.A.1.1.4                                           | Orpinomyces_14384 | Glucose                      | Uniport                | Bacteria        | 5.00E-12     | <i>Zymomonas mobilis</i>              |
| 2.A.1.1.5                                           | Orpinomyces_11701 | Hexose                       | Uniport                | Yeast           | 7.00E-23     | <i>Saccharomyces cerevisiae</i>       |
| 2.A.1.1.6                                           | 2511054810        | Galactose, gucose, xylose    | Uniport                | Yeast           | 2.00E-08     | <i>Saccharomyces cerevisiae</i>       |
| 2.A.1.1.19                                          | Orpinomyces_14872 | Low affinity glucose         | Uniport                | Yeast           | 2.00E-21     | <i>Saccharomyces cerevisiae</i>       |
| 2.A.1.1.20                                          | 2511051114        | Myoinositol                  | H <sup>+</sup> symport | Protozoa        | 4.00E-07     | <i>Pyrenophora teres f. teres 0-1</i> |
|                                                     | Orpinomyces_15983 |                              |                        |                 | 4.00E-07     | <i>Pyrenophora teres f. teres 0-1</i> |
| 2.A.1.1.21                                          | 2511051847        | Hexose (glucose>fructose)    | H <sup>+</sup> symport | Yeast           | 8.00E-18     | <i>Saccharomyces cerevisiae</i>       |
| 2.A.1.1.22                                          | 2511057085        | Hexose (fructose>glucose)    | H <sup>+</sup> symport | Yeast           | 1.00E-06     | <i>Schizosaccharomyces pombe</i>      |
| 2.A.1.1.23                                          | 2511051722        | Gluconate                    | H <sup>+</sup> symport | Yeast           | 1.00E-05     | <i>Schizosaccharomyces pombe</i>      |
|                                                     | 2511056106        |                              |                        |                 | 9.00E-35     | <i>Schizosaccharomyces pombe</i>      |
|                                                     | 2511059306        |                              |                        |                 | 2.00E-12     | <i>Arabidopsis thaliana</i>           |
|                                                     | 2510872284        |                              |                        |                 | 2.00E-12     | <i>Arabidopsis thaliana</i>           |
| 2.A.1.1.30                                          | 2511052453        | Low affinity glucose         | Uniport                | Yeast           | 4.00E-52     | <i>Saccharomyces cerevisiae</i>       |
|                                                     | Orpinomyces_6091  |                              |                        |                 | 2.00E-20     | <i>Saccharomyces cerevisiae</i>       |
| 2.A.1.1.35                                          | Orpinomyces_15569 | Glucose, 2-deoxyglucose      | Uniport                | Bacteria        | 6.00E-07     | <i>Arabidopsis thaliana</i>           |

|                                                                           |                   |                                                                    |                        |          |          |                                  |
|---------------------------------------------------------------------------|-------------------|--------------------------------------------------------------------|------------------------|----------|----------|----------------------------------|
| 2.A.1.1.39                                                                | 2511052318        | High affinity glucose                                              | Uniport                | Yeast    | 1.00E-18 | <i>Candida albicans</i>          |
| 2.A.1.1.40                                                                | 2511057329        | Xylose                                                             | Uniport                | Yeast    | 9.00E-16 | <i>Saccharomyces cerevisiae</i>  |
|                                                                           | 2510865509        |                                                                    |                        |          | 2.00E-18 | <i>Saccharomyces cerevisiae</i>  |
| 2.A.1.1.41                                                                | 2511056052        | D-xylose                                                           | H <sup>+</sup> symport | Bacteria | 2.00E-13 | <i>Arabidopsis thaliana</i>      |
|                                                                           | Orpinomyces_15569 |                                                                    |                        |          | 2.00E-13 | <i>Arabidopsis thaliana</i>      |
| 2.A.1.1.51                                                                | 2511049304        | Glucose, xylose                                                    | H <sup>+</sup> symport | Yeast    | 4.00E-41 | <i>Kluyveromyces lactis</i>      |
|                                                                           | 2511056275        |                                                                    |                        |          | 7.00E-41 | <i>Saccharomyces cerevisiae</i>  |
|                                                                           | 2511060108        |                                                                    |                        |          | 4.00E-47 | <i>Saccharomyces cerevisiae</i>  |
|                                                                           | 2510872025        |                                                                    |                        |          | 8.00E-41 | <i>Saccharomyces cerevisiae</i>  |
| 2.A.1.1.53                                                                | 2510855196        | Myoinositol                                                        | Uniport                | Bacteria | 4.00E-08 | <i>Chlorella kessleri</i>        |
| 2.A.1.1.55                                                                | Orpinomyces_4098  | L-arabinose, xylose, glucose                                       | H <sup>+</sup> symport | Bacteria | 3.00E-40 | <i>Bacillus subtilis</i>         |
|                                                                           | 2511056033        |                                                                    |                        |          | 3.00E-35 | <i>Bacillus subtilis</i>         |
|                                                                           | Orpinomyces_6091  |                                                                    |                        |          | 1.00E-50 | <i>Saccharomyces cerevisiae</i>  |
|                                                                           | 2511059727        |                                                                    |                        |          | 2.00E-16 | <i>Bacillus subtilis</i>         |
|                                                                           | Orpinomyces_2876  |                                                                    |                        |          | 3.00E-40 | <i>Bacillus subtilis</i>         |
|                                                                           | Orpinomyces_8990  |                                                                    |                        |          | 4.00E-31 | <i>Arabidopsis thaliana</i>      |
|                                                                           | Orpinomyces_15353 |                                                                    |                        |          | 3.00E-35 | <i>Bacillus subtilis</i>         |
|                                                                           | Orpinomyces_15217 |                                                                    |                        |          | 2.00E-33 | <i>Bacillus subtilis</i>         |
| 2510873278                                                                | 2.00E-16          | <i>Bacillus subtilis</i>                                           |                        |          |          |                                  |
| 2.A.1.1.57                                                                | Orpinomyces_15235 | High affinity glucose                                              | H <sup>+</sup> symport | Fungi    | 7.00E-16 | <i>Neurospora crassa</i>         |
| 2.A.1.1.58                                                                | 2511048974        | Low affinity glucose                                               | H <sup>+</sup> symport | Fungi    | 2.00E-41 | <i>Escherichia coli O157:H7</i>  |
|                                                                           | 2511052287        |                                                                    |                        |          | 8.00E-21 | <i>Schizosaccharomyces pombe</i> |
|                                                                           | 2511052403        |                                                                    |                        |          | 2.00E-43 | <i>Kluyveromyces lactis</i>      |
|                                                                           | Orpinomyces_13994 |                                                                    |                        |          | 5.00E-15 | <i>Lactobacillus brevis</i>      |
|                                                                           | Orpinomyces_14872 |                                                                    |                        |          | 2.00E-14 | <i>Homo sapiens</i>              |
| 2.A.1.1.61                                                                | Orpinomyces_10621 | High affinity monosaccharide (glucose, galactose, mannose, xylose) | H <sup>+</sup> symport | Plants   | 2.00E-24 | <i>Arabidopsis thaliana</i>      |
| <b>2. Subfamily (2.A.1.4) Fucose:H<sup>+</sup> symporter family (FHS)</b> |                   |                                                                    |                        |          |          |                                  |

|                                                                                |                   |                             |                                           |                         |           |                                         |
|--------------------------------------------------------------------------------|-------------------|-----------------------------|-------------------------------------------|-------------------------|-----------|-----------------------------------------|
| 2.A.1.7.3                                                                      | Orpinomyces_7618  | Glucose, mannose, xylose    | H <sup>+</sup> symport                    | Bacteria                | 2.00E-145 | <i>Oribacterium sinus F0268</i>         |
|                                                                                | Orpinomyces_14909 |                             |                                           |                         | 2.00E-145 | <i>Oribacterium sinus F0268</i>         |
| <b>B. Glycoside-Pentoside-Hexuronide:cation symporter family (GPH) (2.A.2)</b> |                   |                             |                                           |                         |           |                                         |
| 2.A.2.3.2                                                                      | 2511051033        | Pentoside permease          | Na <sup>+</sup> or H <sup>+</sup> symport | G <sup>+</sup> Bacteria | 4.00E-11  | <i>Bacillus subtilis</i>                |
|                                                                                | Orpinomyces_9871  |                             |                                           |                         | 2.00E-37  | <i>Bacillus subtilis</i>                |
|                                                                                | 2511054137        |                             |                                           |                         | 8.00E-14  | <i>Bacillus subtilis</i>                |
|                                                                                | 2511055215        |                             |                                           |                         | 7.00E-15  | <i>Bacillus subtilis</i>                |
|                                                                                | 2511062640        |                             |                                           |                         | 2.00E-06  | <i>Bacillus subtilis</i>                |
|                                                                                | 2511062641        |                             |                                           |                         | 3.00E-21  | <i>Bacillus subtilis</i>                |
|                                                                                | 2510863878        |                             |                                           |                         | 4.00E-24  | <i>Bacillus subtilis</i>                |
|                                                                                | 2510871901        |                             |                                           |                         | 4.00E-21  | <i>Bacillus subtilis</i>                |
|                                                                                | 2510872640        |                             |                                           |                         | 7.00E-15  | <i>Bacillus subtilis</i>                |
|                                                                                | 2510850345        |                             |                                           |                         | 3.00E-13  | <i>Bacillus subtilis</i>                |
|                                                                                | 2510863877        |                             |                                           |                         | 2.00E-06  | <i>Bacillus subtilis</i>                |
| 2510871900                                                                     | 2.00E-06          | <i>Bacillus subtilis</i>    |                                           |                         |           |                                         |
| 2.A.2.3.5                                                                      | 2510850800        | Probable B-xyloside         | Na <sup>+</sup> or H <sup>+</sup> symport | Bacteria                | 9.00E-09  | <i>Bacillus subtilis</i>                |
| 2.A.2.6.1                                                                      | Orpinomyces_10983 | Maltose, sucrose            | Na <sup>+</sup> or H <sup>+</sup> symport | Yeast                   | 9.00E-55  | <i>Schizosaccharomyces pombe</i>        |
|                                                                                | Orpinomyces_10983 |                             |                                           |                         | 1.00E-42  | <i>Schizosaccharomyces pombe</i>        |
| <b>II. ATP-dependent primary active transporters</b>                           |                   |                             |                                           |                         |           |                                         |
| <b>A. The ATP-binding Cassette [ABC] Superfamily (3.A.1)</b>                   |                   |                             |                                           |                         |           |                                         |
| <b>1. The Carbohydrate Uptake Transporter-1 (CUT1) Family (3.A.1.1)</b>        |                   |                             |                                           |                         |           |                                         |
| 3.A.1.1.17                                                                     | Orpinomyces_1656  | Trehalose, maltose, sucrose | ATP-dependent active transport            | Proteobacteria          | 2.00E-36  | <i>Ochrobactrum anthropi ATCC 49188</i> |
|                                                                                | Orpinomyces_15808 |                             |                                           |                         | 5.00E-08  | <i>Deinococcus radiodurans</i>          |
|                                                                                | 2510874816        |                             |                                           |                         | 5.00E-08  | <i>Deinococcus radiodurans</i>          |
|                                                                                | Orpinomyces_6050  |                             |                                           |                         | 3.00E-17  | <i>Agrobacterium radiobacter K84</i>    |

|                                                                               |                   |                                                               |                                |                |          |                                             |
|-------------------------------------------------------------------------------|-------------------|---------------------------------------------------------------|--------------------------------|----------------|----------|---------------------------------------------|
|                                                                               | 2510855885        |                                                               |                                |                | 4.00E-09 | <i>Deinococcus radiodurans</i>              |
|                                                                               | Orpinomyces_5442  |                                                               |                                |                | 3.00E-10 | <i>Chromohalobacter salexigens DSM 3043</i> |
|                                                                               | Orpinomyces_15631 |                                                               |                                |                | 1.00E-10 | <i>Brucella melitensis ATCC 23457</i>       |
|                                                                               | Orpinomyces_1570  |                                                               |                                |                | 2.00E-10 | <i>Rhodospirillum centenum SW</i>           |
|                                                                               | 2510870707        |                                                               |                                |                | 5.00E-07 | <i>Deinococcus radiodurans</i>              |
| 3.A.1.1.19                                                                    | 2511054746        | Palatinose (isomaltulose)                                     | ATP-dependent active transport | Proteobacteria | 2.00E-11 | <i>Agrobacterium tumefaciens 5A</i>         |
|                                                                               | Orpinomyces_7769  |                                                               |                                |                | 5.00E-20 | <i>Deinococcus radiodurans</i>              |
|                                                                               | 2510867483        |                                                               |                                |                | 4.00E-33 | <i>Deinococcus radiodurans</i>              |
|                                                                               | Orpinomyces_5584  |                                                               |                                |                | 6.00E-20 | <i>Deinococcus radiodurans</i>              |
|                                                                               | 2510850900        |                                                               |                                |                | 6.00E-12 | <i>Deinococcus radiodurans</i>              |
|                                                                               | Orpinomyces_15365 |                                                               |                                |                | 4.00E-21 | <i>Halanaerobium praevalens DSM 2228</i>    |
|                                                                               | 2510856662        |                                                               |                                |                | 7.00E-09 | <i>Mesorhizobium australicum WSM2073</i>    |
| 3.A.1.1.25                                                                    | Orpinomyces_1401  | Trehalose, maltose, sucrose, palatinose, low affinity glucose | ATP-dependent active transport | Bacteria       | 5.00E-13 | <i>Desulfomonile tiedjei DSM 6799</i>       |
|                                                                               | Orpinomyces_1401  |                                                               |                                |                | 1.00E-12 | <i>Desulfomonile tiedjei DSM 6799</i>       |
|                                                                               | Orpinomyces_5966  |                                                               |                                |                | 2.00E-13 | <i>Deinococcus radiodurans</i>              |
|                                                                               |                   |                                                               |                                |                |          |                                             |
| <b>2. The Peptide/Opine/Nickel Uptake Transporter (PepT) Family (3.A.1.5)</b> |                   |                                                               |                                |                |          |                                             |
| 3.A.1.5.9                                                                     | 2511050031        | Cellobiose, cellooligosaccharide                              | ATP-dependent active transport | Archaea        | 1.00E-06 | <i>Mus musculus</i>                         |
|                                                                               |                   |                                                               |                                |                |          |                                             |

Table S17. Proteases/Peptidases of strain C1A

| Family/<br>subfamily         | Comment                                                                                                     | Presence in<br>Fungi | Location                                                                                                        |
|------------------------------|-------------------------------------------------------------------------------------------------------------|----------------------|-----------------------------------------------------------------------------------------------------------------|
| <b>1. Aspartate protease</b> |                                                                                                             |                      |                                                                                                                 |
| A01A                         | Endopeptidases active at acidic pH                                                                          | yes                  | The enzymes are mostly secreted from cells as inactive proenzymes that activate autocatalytically at acidic pH. |
| A11A                         | Endopeptidases processing retrotransposons-encoded polypeptides                                             | yes                  |                                                                                                                 |
| A22A                         | Intramembrane endopeptidases component of gamma-secretase complex                                           | Basal fungi          | Intramembrane                                                                                                   |
| A22B                         | Intramembrane endopeptidases component of gamma-secretase complex                                           | Basal fungi          | Intramembrane                                                                                                   |
| <b>2. Cysteine protease</b>  |                                                                                                             |                      |                                                                                                                 |
| C01A                         | Endopeptidases of the lysosomal system                                                                      | yes                  | Intracellular                                                                                                   |
| C12                          | Ubiquitinyl hydrolases                                                                                      | yes                  | Intracellular                                                                                                   |
| C13                          | Asparaginyl endopeptidases (lysosomal) and glycosylphosphatidylinositol:protein transamidase (ER)           | yes                  | Intracellular                                                                                                   |
| C14B                         | Caspases, cytosolic endopeptidases                                                                          | yes                  | Intracellular                                                                                                   |
| C15                          | Pyroglutamyl-peptidase, omega peptidases that release an N-terminal pyroglutamate residue                   | yes                  | Intracellular                                                                                                   |
| C19                          | Ubiquitin-specific peptidase 14                                                                             | yes                  | Intracellular                                                                                                   |
| C26                          | Gamma-glutamyl hydrolase, lysosomal enzyme probably involved in the turnover of folyl poly-gamma-glutamates | yes                  | Intracellular                                                                                                   |
| C44                          | Amidophosphoribosyltransferase self-processing precursor                                                    | yes                  | Intracellular                                                                                                   |
| C48                          | SUMO (small ubiquitin-like modifier) deconjugating enzymes                                                  | yes                  | Intracellular                                                                                                   |
| C50                          | Separase required for the separation of sister chromatids during mitosis                                    | yes                  | Intracellular                                                                                                   |

|     |                                                                                                                                                                                                                                                                                                                                                                                                                                                                                                                                                                                                                                                                                                                                                            |                                                                                                                                                      |                        |
|-----|------------------------------------------------------------------------------------------------------------------------------------------------------------------------------------------------------------------------------------------------------------------------------------------------------------------------------------------------------------------------------------------------------------------------------------------------------------------------------------------------------------------------------------------------------------------------------------------------------------------------------------------------------------------------------------------------------------------------------------------------------------|------------------------------------------------------------------------------------------------------------------------------------------------------|------------------------|
| C54 | Endopeptidases with specificity for glycyl bonds. Activate and delipidate proteins important in a number of intracellular signalling pathways that involve transfer of proteins across membranes, including autophagy, intra-Golgi transport and receptor sorting                                                                                                                                                                                                                                                                                                                                                                                                                                                                                          | yes                                                                                                                                                  | Intracellular          |
| C59 | The only known peptidase activity is the autolytic cleavage of the penicillin V acylase precursor protein. The autolysis step produces a mature amidase with Cys1 as the nucleophile. All peptidase activity is lost on conversion to the mature peptidase. Exhibits great diversity in substrate specificity, to include enzymes such as choloyglycine hydrolases, acid ceramidases, isopenicillin N acyltransferases, and a subgroup of eukaryotic proteins with unclear function.                                                                                                                                                                                                                                                                       | Only in <i>Gibberella zeae</i>                                                                                                                       | Possibly intracellular |
| C65 | Isopeptidases that release ubiquitin from polyubiquitin                                                                                                                                                                                                                                                                                                                                                                                                                                                                                                                                                                                                                                                                                                    | yes                                                                                                                                                  | Intracellular          |
| C69 | Dipeptidases and aminopeptidases. D-alanyl-D-alanine dipeptidase.                                                                                                                                                                                                                                                                                                                                                                                                                                                                                                                                                                                                                                                                                          | Only in <i>Gibberella zeae</i>                                                                                                                       | Possibly intracellular |
| C83 | Exopeptidases. The synthesis of phytochelatins by the action of a gamma-glutamylcysteine dipeptidyl transpeptidase. Phytochelatins are the principle heavy-metal detoxifying compounds in the plant kingdom. They are linear polymers of the gamma-Glu-Cys portion of glutathione (GSH), with the general formula (Glu-Cys) <sub>n</sub> -Gly, where n= 2-11. The family also contains enzymes that hydrolyse the terminal Gly from glutathione (gamma-Glu-Cys-Gly) but lack the transferase activity necessary for the synthesis of phytochelatin. Glutathione is gamma-Glu-Cys-Gly, and its degradation by cleavage of the C-terminal Gly contrasts with the action of the gamma-glutamyltransferases (e.g. T03.001) that remove the N-terminal residue. | <i>Puccinia graminis</i> ,<br><i>Schizosaccharomyces japonicus</i> , <i>S. pombe</i>                                                                 | Intracellular          |
| C85 | Deubiquitinating peptidases                                                                                                                                                                                                                                                                                                                                                                                                                                                                                                                                                                                                                                                                                                                                | yes                                                                                                                                                  | Intracellular          |
| C86 | Deubiquitinating peptidases                                                                                                                                                                                                                                                                                                                                                                                                                                                                                                                                                                                                                                                                                                                                | <i>Coprinopsis cinerea</i> ,<br><i>Cryptococcus gattii</i> ,<br><i>Filobasidiella neoformans</i> ,<br><i>Laccaria bicolor</i> ,<br><i>Malassezia</i> | Intracellular          |

|                           |                                                                                                                                                                                                                                                                                                             |                                 |                                                                                                               |
|---------------------------|-------------------------------------------------------------------------------------------------------------------------------------------------------------------------------------------------------------------------------------------------------------------------------------------------------------|---------------------------------|---------------------------------------------------------------------------------------------------------------|
|                           |                                                                                                                                                                                                                                                                                                             | <i>globosa, Ustilago maydis</i> |                                                                                                               |
| C88                       | Deubiquitinating enzymes                                                                                                                                                                                                                                                                                    | yes                             | Intracellular                                                                                                 |
| <b>3. Metalloprotease</b> |                                                                                                                                                                                                                                                                                                             |                                 |                                                                                                               |
| M01                       | Aminopeptidases. The family also contains pyroglutamyl-peptidase II. Pyroglutamyl-peptidase II and aminopeptidase N are membrane-bound with N-terminal cytoplasmic and transmembrane domains.                                                                                                               | yes                             | Intracellular. Some homologues have a signal peptide and transmembrane domain and so might be membrane bound. |
| M03A                      | Endopeptidase activity that is restricted to substrates of low molecule mass, and is therefore termed 'oligopeptidase'. One likely function of peptidases in family M3 is the intracellular degradation of oligopeptides. These could include cleaved signal peptides, and products of protein degradation. | yes                             | Intracellular                                                                                                 |
| M13                       | Endopeptidase. Probably all peptidases in family M13 are restricted to acting on substrates of not more than about 40 residues. The enzymes act outside animal cells to degrade or convert polypeptide substrates.                                                                                          | yes                             | Extracellular                                                                                                 |
| M14B                      | Metallocarboxypeptidases hydrolysing single, C-terminal amino acids from polypeptide chains.                                                                                                                                                                                                                | yes                             | Intracellular                                                                                                 |
| M16A                      | Zn metalloendopeptidase                                                                                                                                                                                                                                                                                     | yes                             | Intracellular                                                                                                 |
| M16B                      | Mitochondrial processing peptidase beta-subunit                                                                                                                                                                                                                                                             | yes                             | Intracellular                                                                                                 |
| M16C                      | Zn metalloendopeptidase                                                                                                                                                                                                                                                                                     | yes                             | Intracellular                                                                                                 |



|      |                                                                                                                                                                                |                                                                                                                                                                                                                                                                                                                                                                                                              |               |
|------|--------------------------------------------------------------------------------------------------------------------------------------------------------------------------------|--------------------------------------------------------------------------------------------------------------------------------------------------------------------------------------------------------------------------------------------------------------------------------------------------------------------------------------------------------------------------------------------------------------|---------------|
| M17  | Leucyl aminopeptidase is cytosolic and involved in the breakdown of peptide products of intracellular proteinases.                                                             | <i>Batrachochytrium dendrobatidis</i> ,<br><i>Coprinopsis cinerea</i> , <i>Laccaria bicolor</i> ,<br><i>Malassezia globosa</i> ,<br><i>Phanerochaete chrysosporium</i> ,<br><i>Postia placenta</i> ,<br><i>Puccinia graminis</i> ,<br><i>Schizosaccharomyces japonicus</i> ,<br><i>Schizosaccharomyces pombe</i> ,<br><i>Serpula lacrymans</i> ,<br><i>Sporisorium reilianum</i> ,<br><i>Ustilago maydis</i> | Intracellular |
| M18  | Aspartyl aminopeptidase is a cytosolic enzyme, and probably contributes to the catabolism of peptides including those produced by the proteasome.                              | yes                                                                                                                                                                                                                                                                                                                                                                                                          | Intracellular |
| M20A | Glutamate carboxypeptidase. Exopeptidases. The peptidases hydrolyse the late products of protein degradation so as to complete the conversion of proteins to free amino acids. | yes                                                                                                                                                                                                                                                                                                                                                                                                          | Intracellular |
| M20B | Peptidase T. exopeptidases. The peptidases hydrolyse the late products of protein degradation so as to complete the conversion of proteins to free amino acids.                | yes                                                                                                                                                                                                                                                                                                                                                                                                          | Intracellular |
| M20C | Xaa-His dipeptidase. Exopeptidases. The peptidases hydrolyse the late products of protein degradation so as to complete the conversion of proteins to free amino acids.        | yes                                                                                                                                                                                                                                                                                                                                                                                                          | Intracellular |

|      |                                                                                                                                                                                                                                                                                                                                                                                                                                            |     |                                                                                |
|------|--------------------------------------------------------------------------------------------------------------------------------------------------------------------------------------------------------------------------------------------------------------------------------------------------------------------------------------------------------------------------------------------------------------------------------------------|-----|--------------------------------------------------------------------------------|
| M20D | Carboxypeptidase Ss1. Exopeptidases. The peptidases hydrolyse the late products of protein degradation so as to complete the conversion of proteins to free amino acids.                                                                                                                                                                                                                                                                   | yes | Intracellular                                                                  |
| M22  | Endopeptidase that cleaves only proteins that are <i>O</i> -sialoglycosylated. Removal of the carbohydrate prevents cleavage                                                                                                                                                                                                                                                                                                               | yes | Possibly intracellular                                                         |
| M23B | Endopeptidases that lyse bacterial cell wall peptidoglycans. The peptidases in the family cleave either the N-acylmuramoyl-Ala bond between the cell wall peptidoglycan and the cross-linking peptide or a bond within the cross-linking peptide.                                                                                                                                                                                          | yes | The peptidases are synthesized as precursors and are activated extracellularly |
| M24A | Methionyl aminopeptidase. Removal of the initiating N-terminal methionine from newly synthesized proteins acting co-translationally in association with the ribosomes.                                                                                                                                                                                                                                                                     | yes | Intracellular                                                                  |
| M24B | The X-Pro dipeptidase found in eukaryotes has a role in the cleavage of Xaa-Pro linkages found in dipeptides associated with collagen recycling.                                                                                                                                                                                                                                                                                           | yes | Intracellular                                                                  |
| M28A | Aminopeptidase S. Glutaminyl-peptide cyclotransferase. Convert N-terminal glutamine to oxoproline. Catalyse the cyclization of free L-glutamine and N-terminal glutaminyl residues in proteins to pyroglutamate (5-oxoproline) and pyroglutamyl residues respectively.                                                                                                                                                                     | yes | Possibly extracellular                                                         |
| M35  | Fungal metalloendopeptidases                                                                                                                                                                                                                                                                                                                                                                                                               | yes | Possibly extracellular                                                         |
| M36  | Family M36 includes a number of endopeptidases from pathogenic fungi. These endopeptidases appear to be adapted for cleaving extracellular matrix proteins such as elastin and keratin                                                                                                                                                                                                                                                     | yes | Possibly extracellular                                                         |
| M41  | ATP-dependent metalloendopeptidases. The physiological substrates of peptidases in family M41 are generally membrane proteins. The mitochondrial-AAA protease has a chaperone function important for the correct assembly of protein complexes in the mitochondrion, including elements of the respiratory chain and ATP-dependent enzymes. Both m-AAA and i-AAA endopeptidases are essential for the breakdown of uncomplexed components. | yes | Intracellular                                                                  |

|                           |                                                                                                                                                                                                                                                                                                                                                                                                                                             |             |                   |
|---------------------------|---------------------------------------------------------------------------------------------------------------------------------------------------------------------------------------------------------------------------------------------------------------------------------------------------------------------------------------------------------------------------------------------------------------------------------------------|-------------|-------------------|
| M48A                      | Cleavage of prenylated proteins. CAAX prenyl protease 1. The peptide bond hydrolyzed can be designated -C-l-A-A-X in which C is an S-isoprenylated cysteine residue, A is usually aliphatic and X is the C-terminal residue of the substrate protein, and may be any of several amino acids. Subsequently, the S-isoprenylated cysteine residue that forms the new C-terminus is methyl-esterified and forms a hydrophobic membrane-anchor. | yes         | Intracellular     |
| M48B                      | May be involved in the degradation of abnormal proteins                                                                                                                                                                                                                                                                                                                                                                                     | yes         | Intracellular     |
| M50A                      | S2P peptidase                                                                                                                                                                                                                                                                                                                                                                                                                               | Basal fungi | Intramembrane     |
| M67A                      | Isopeptidases that release ubiquitin from ubiquitinated proteins                                                                                                                                                                                                                                                                                                                                                                            | yes         | Intracellular     |
| M67C                      | AMSH deubiquitinating peptidase. AMSH is associated with endosomes affecting the rate of turnover of receptor proteins which are ubiquitinated and sorted to the lysosome for degradation.                                                                                                                                                                                                                                                  | yes         | Intracellular     |
| <b>4. Serine protease</b> |                                                                                                                                                                                                                                                                                                                                                                                                                                             |             |                   |
| S01B                      | Glutamyl peptidase                                                                                                                                                                                                                                                                                                                                                                                                                          | yes         | Intracellular     |
| S08A                      | Serine endopeptidase subtilisin and its homologues. In bacteria, archaea and fungi, family members are probably involved in nutrition. Site-1 protease (S08.063) is a mammalian member of subfamily S8A which catalyzes the first step in the proteolytic activation of sterol regulatory element-binding protein.                                                                                                                          | yes         | Most are secreted |
| S08B                      | In subfamily S8B, kexin (S08.070) processes the yeast alpha-mating factor and killer toxin precursors.                                                                                                                                                                                                                                                                                                                                      | yes         | Most are secreted |
| S09A                      | Prolyl oligopeptidase. Active mainly on oligopeptides. Important for the degradation of biologically active peptides                                                                                                                                                                                                                                                                                                                        | yes         | Intracellular     |
| S09B                      | Dipeptidyl-peptidase IV. Active mainly on oligopeptides. important for the degradation of biologically active peptides                                                                                                                                                                                                                                                                                                                      | yes         | Intracellular     |
| S09C                      | Acylaminoacyl-peptidase. Active mainly on oligopeptides. important for the degradation of biologically active peptides                                                                                                                                                                                                                                                                                                                      | yes         | Intracellular     |
| S09D                      | Glutamyl endopeptidase. Active mainly on oligopeptides. important for the degradation of biologically active peptides                                                                                                                                                                                                                                                                                                                       | yes         | Intracellular     |

|     |                                                                                                                                                                                                                                                                                                                                                                                                                                                                                                                                                                                                              |                                                                                                                                            |                                    |
|-----|--------------------------------------------------------------------------------------------------------------------------------------------------------------------------------------------------------------------------------------------------------------------------------------------------------------------------------------------------------------------------------------------------------------------------------------------------------------------------------------------------------------------------------------------------------------------------------------------------------------|--------------------------------------------------------------------------------------------------------------------------------------------|------------------------------------|
| S10 | Carboxypeptidases. peptidases are only active at acidic pH. The serine carboxypeptidases are synthesised as preproenzymes. Lysosomal carboxypeptidase A is essential for the correct assembly and function of the particle that contains beta-galactosidase and neuraminidase.                                                                                                                                                                                                                                                                                                                               | yes                                                                                                                                        | Intracellular                      |
| S14 | Endopeptidase Clp and its homologues. Proteasome components.                                                                                                                                                                                                                                                                                                                                                                                                                                                                                                                                                 | yes                                                                                                                                        | Intracellular                      |
| S33 | Prolyl aminopeptidase. Exopeptidases that act at the N-terminus of peptides. Prolyl aminopeptidase (S33.001) releases an N-terminal residue from a peptide, preferably (but not exclusively) a proline.                                                                                                                                                                                                                                                                                                                                                                                                      | yes                                                                                                                                        | Intracellular                      |
| S49 | Signal peptide peptidase                                                                                                                                                                                                                                                                                                                                                                                                                                                                                                                                                                                     | Mainly bacterial. Found in fungi only in <i>Malassezia globosa</i> , <i>Ustilago maydis</i> . In eukaryotes found in plants, and protozoa. | In bacteria acts in the periplasm. |
| S54 | Rhomboid intramembrane protease. Substrates include TGFalpha-like growth factor preprotein. Cleavage occurs in the Golgi, following translocation of the substrates from the endoplasmic reticulum membrane by Star, another transmembrane protein. The growth factors are then able to activate the epidermal growth factor receptor. In <i>Saccharomyces cerevisiae</i> the Pcp1 protein (S54.007) has a completely different function, and is a mitochondrial endopeptidase required for the activation of cytochrome c peroxidase and for the processing of the mitochondrial dynamin-like protein Mgm1. | yes                                                                                                                                        |                                    |
| S58 | Aminopeptidase                                                                                                                                                                                                                                                                                                                                                                                                                                                                                                                                                                                               | yes                                                                                                                                        | Intramembrane                      |
| S59 | Autolytic endopeptidase. Autolytic processing to generate Nup98 and Nup96 is essential for correct targeting of these components to the nucleoplasmic side of the nuclear pore complex and for correct formation of the nuclear pore.                                                                                                                                                                                                                                                                                                                                                                        | Yes                                                                                                                                        | Intracellular                      |

|                              |                                                                                                                                                                                                                                                                                                                                                                                                                                                                                                                                                         |                                                                                                                     |                        |
|------------------------------|---------------------------------------------------------------------------------------------------------------------------------------------------------------------------------------------------------------------------------------------------------------------------------------------------------------------------------------------------------------------------------------------------------------------------------------------------------------------------------------------------------------------------------------------------------|---------------------------------------------------------------------------------------------------------------------|------------------------|
| S66                          | Bacterial LD-carboxypeptidases. The physiological substrates are tetrapeptide peptidoglycan fragments that contain an L-configured residue (lysine or meso-diaminopimelic acid) to which is attached a C-terminal D-alanine residue. It is the bond to the C-terminal D-Ala residue that is hydrolysed.                                                                                                                                                                                                                                                 | Bacterial. Not in fungi but present in animals ( <i>Acyrtosiphon pisum</i> , <i>Anopheles gambiae</i> ), and plants | Intracellular          |
| <b>5. Threonine protease</b> |                                                                                                                                                                                                                                                                                                                                                                                                                                                                                                                                                         |                                                                                                                     |                        |
| T01A                         | The component peptidases of the proteasome and related compound peptidases                                                                                                                                                                                                                                                                                                                                                                                                                                                                              | Yes                                                                                                                 | Intracellular          |
| T03                          | Gamma-glutamyltransferase 1. Peptidase family T3 contains self-processing proteins that express aminopeptidase as well as aminotransferase activities in their mature forms. Mammalian gamma-glutamyl transferase occurs as a heterodimeric enzyme that is highly glycosylated and processed in the endoplasmic reticulum and Golgi, and then becomes attached to the external surface of cell membranes. Its physiological function is the degradation of glutathione by cleavage of the gamma-glutamyl bond, either by hydrolysis or transpeptidation | Yes                                                                                                                 | Possibly extracellular |
| T05                          | Self-processing ornithine acetyltransferase precursor. Only the precursor of ornithine acetyltransferase has peptidase activity. The mature form of the enzyme released by the autoproteolytic cleavage of the precursor catalyses the reversible interchange of an acetyl group between N-acetylornithine and glutamate                                                                                                                                                                                                                                | Yes                                                                                                                 | Intracellular          |

1

2

Table S18. Carbohydrate-active enzymes (CAZymes) in the C1A genome

| Family                      | Gene ID           | Associated domains | Degradation of Cell Wall Component | Predicted Fuction              | Top Hit phylogeny              | Phylogeny color code* | Top hit in Neocall |           |
|-----------------------------|-------------------|--------------------|------------------------------------|--------------------------------|--------------------------------|-----------------------|--------------------|-----------|
|                             |                   |                    |                                    |                                |                                |                       | Accession #        | Reference |
| <b>Glycoside hydrolases</b> |                   |                    |                                    |                                |                                |                       |                    |           |
| GH1                         | Orpinomyces_14808 |                    | Cellulose                          | $\beta$ -glucosidase           | Phytophthora infestans T30-4   |                       | AAP30745.1         | (81)      |
| GH1                         | Orpinomyces_16414 |                    | Cellulose                          | $\beta$ -glucosidase           | Picea sitchensis               |                       | AAP30745.1         | (81)      |
| GH1                         | Orpinomyces_16492 |                    | Cellulose                          | $\beta$ -glucosidase           | Camptotheca acuminata          |                       | AAD45834.1         | (82)      |
| GH1                         | Orpinomyces_16550 |                    | Cellulose                          | $\beta$ -glucosidase           | Magnaporthe oryzae 70-15       |                       | AAP30745.1         | (81)      |
| GH1                         | Orpinomyces_16576 |                    | Cellulose                          | $\beta$ -glucosidase           | Aspergillus clavatus NRRL 1    |                       | AAP30745.1         | (81)      |
| GH1                         | Orpinomyces_1791  |                    | Cellulose                          | $\beta$ -glucosidase           | Neosartorya fischeri NRRL 181  |                       | AAP30745.1         | (81)      |
| GH1                         | Orpinomyces_1810  |                    | Cellulose                          | $\beta$ -glucosidase           | Tribolium castaneum            |                       | CAC34952.1         | (83)      |
| GH1                         | Orpinomyces_3649  |                    | Cellulose                          | $\beta$ -glucosidase           | Camptotheca acuminata          |                       | AAD45834.1         | (82)      |
| GH1                         | Orpinomyces_8060  |                    | Cellulose                          | $\beta$ -glucosidase           | Neosartorya fischeri NRRL 181  |                       | AAD45834.1         | (82)      |
| GH2                         | Orpinomyces_14660 |                    | Hemicellulose                      | $\beta$ -galactosidase         | Ruminococcus flavefaciens FD-1 |                       |                    |           |
| GH2                         | Orpinomyces_14749 |                    | Hemicellulose                      | endo-1,4- $\beta$ -mannosidase | Flammeovirga yaeyamensis       |                       |                    |           |

|     |                   |  |               |                                |                                |  |            |      |
|-----|-------------------|--|---------------|--------------------------------|--------------------------------|--|------------|------|
| GH2 | Orpinomyces_4367  |  | Hemicellulose | endo-1,4- $\beta$ -mannosidase | Flammeovirga yaeyamensis       |  |            |      |
| GH2 | Orpinomyces_9907  |  | Hemicellulose | endo-1,4- $\beta$ -mannosidase | Flammeovirga yaeyamensis       |  |            |      |
| GH3 | Orpinomyces_11276 |  | Cellulose     | $\beta$ -glucosidase           | Roseburia hominis A2-183       |  |            |      |
| GH3 | Orpinomyces_11433 |  | Cellulose     | $\beta$ -glucosidase           | Rhizopus oryzae RA 99-880      |  | AFI47447.1 | (84) |
| GH3 | Orpinomyces_11443 |  | Cellulose     | $\beta$ -glucosidase           | Haloplasma contractile SSD-17B |  |            |      |
| GH3 | Orpinomyces_1261  |  | Cellulose     | $\beta$ -glucosidase           | Roseburia intestinalis L1-82   |  |            |      |
| GH3 | Orpinomyces_1293  |  | Cellulose     | $\beta$ -glucosidase           | Rhizopus oryzae RA 99-880      |  | AFI47447.1 | (84) |
| GH3 | Orpinomyces_14809 |  | Cellulose     | $\beta$ -glucosidase           | Rhizomucor miehei              |  | AFI47447.1 | (84) |
| GH3 | Orpinomyces_15058 |  | Cellulose     | $\beta$ -glucosidase           | Rhizopus oryzae RA 99-880      |  | AFI47447.1 | (84) |
| GH3 | Orpinomyces_15232 |  | Cellulose     | $\beta$ -glucosidase           | Roseburia intestinalis L1-82   |  |            |      |
| GH3 | Orpinomyces_15926 |  | Cellulose     | $\beta$ -glucosidase           | Rhizopus oryzae RA 99-880      |  | AFI47447.1 | (84) |
| GH3 | Orpinomyces_16425 |  | Cellulose     | $\beta$ -glucosidase           | Roseburia intestinalis L1-82   |  |            |      |
| GH3 | Orpinomyces_16439 |  | Cellulose     | $\beta$ -glucosidase           | Roseburia intestinalis XB6B4   |  |            |      |

|     |                   |  |           |                      |                              |  |            |      |
|-----|-------------------|--|-----------|----------------------|------------------------------|--|------------|------|
| GH3 | Orpinomyces_16446 |  | Cellulose | $\beta$ -glucosidase | Roseburia intestinalis XB6B4 |  |            |      |
| GH3 | Orpinomyces_16462 |  | Cellulose | $\beta$ -glucosidase | Rhizopus oryzae RA 99-880    |  | AFI47447.1 | (84) |
| GH3 | Orpinomyces_16466 |  | Cellulose | $\beta$ -glucosidase | Coprococcus comes ATCC 27758 |  |            |      |
| GH3 | Orpinomyces_16467 |  | Cellulose | $\beta$ -glucosidase | Roseburia intestinalis L1-82 |  |            |      |
| GH3 | Orpinomyces_16478 |  | Cellulose | $\beta$ -glucosidase | Roseburia intestinalis L1-82 |  |            |      |
| GH3 | Orpinomyces_16497 |  | Cellulose | $\beta$ -glucosidase | Rhizopus oryzae RA 99-880    |  | AFI47447.1 | (84) |
| GH3 | Orpinomyces_16504 |  | Cellulose | $\beta$ -glucosidase | Roseburia intestinalis XB6B4 |  |            |      |
| GH3 | Orpinomyces_16516 |  | Cellulose | $\beta$ -glucosidase | Roseburia intestinalis XB6B4 |  |            |      |
| GH3 | Orpinomyces_16522 |  | Cellulose | $\beta$ -glucosidase | Rhizopus oryzae RA 99-880    |  | AFI47447.1 | (84) |
| GH3 | Orpinomyces_16534 |  | Cellulose | $\beta$ -glucosidase | Rhizopus oryzae RA 99-880    |  | AEX92706.1 | (85) |
| GH3 | Orpinomyces_16542 |  | Cellulose | $\beta$ -glucosidase | Glarea lozoyensis 74030      |  | AFI47447.1 | (84) |
| GH3 | Orpinomyces_16568 |  | Cellulose | $\beta$ -glucosidase | Rhizopus oryzae RA 99-880    |  | AFI47447.1 | (84) |
| GH3 | Orpinomyces_16582 |  | Cellulose | $\beta$ -glucosidase | Rhizopus oryzae RA 99-880    |  | AEX92706.1 | (85) |



|     |                   |      |           |                      |                              |  |            |      |
|-----|-------------------|------|-----------|----------------------|------------------------------|--|------------|------|
| GH3 | Orpinomyces_16587 |      | Cellulose | $\beta$ -glucosidase | Roseburia intestinalis L1-82 |  |            |      |
| GH3 | Orpinomyces_16604 |      | Cellulose | $\beta$ -glucosidase | Roseburia intestinalis L1-82 |  |            |      |
| GH3 | Orpinomyces_16608 |      | Cellulose | $\beta$ -glucosidase | Aspergillus nidulans FGSC A4 |  | AEX92706.1 | (85) |
| GH3 | Orpinomyces_16619 |      | Cellulose | $\beta$ -glucosidase | Coprococcus comes ATCC 27758 |  |            |      |
| GH3 | Orpinomyces_16631 |      | Cellulose | $\beta$ -glucosidase | Roseburia intestinalis XB6B4 |  |            |      |
| GH3 | Orpinomyces_16736 | Dock | Cellulose | $\beta$ -glucosidase | Rhizopus oryzae RA 99-880    |  | AAO41704.1 | (86) |
| GH3 | Orpinomyces_2490  | Dock | Cellulose | $\beta$ -glucosidase | Phanerochaete chrysosporium  |  | AEX92713.1 | (85) |
| GH3 | Orpinomyces_259   |      | Cellulose | $\beta$ -glucosidase | Roseburia intestinalis XB6B4 |  |            |      |
| GH3 | Orpinomyces_3134  |      | Cellulose | $\beta$ -glucosidase | Rhizopus oryzae RA 99-880    |  | AEX92706.1 | (85) |
| GH3 | Orpinomyces_4249  |      | Cellulose | $\beta$ -glucosidase | Rhizopus oryzae RA 99-880    |  | AFI47447.1 | (84) |
| GH3 | Orpinomyces_4560  |      | Cellulose | $\beta$ -glucosidase | Rhizopus oryzae RA 99-880    |  | AAO41704.1 | (86) |
| GH3 | Orpinomyces_5676  |      | Cellulose | $\beta$ -glucosidase | Roseburia intestinalis L1-82 |  |            |      |

|     |                   |               |               |                                            |                                      |  |            |                                  |
|-----|-------------------|---------------|---------------|--------------------------------------------|--------------------------------------|--|------------|----------------------------------|
| GH3 | Orpinomyces_6669  |               | Cellulose     | $\beta$ -glucosidase                       | Rhizopus oryzae RA 99-880            |  | AEX92706.1 | (85)                             |
| GH3 | Orpinomyces_9603  |               | Cellulose     | $\beta$ -glucosidase                       | Rhizopus oryzae RA 99-880            |  | AEX92706.1 | (85)                             |
| GH5 | Orpinomyces_1071  | Dock,         | Cellulose     | endo-1,4- $\beta$ -D-glucanase (Cellulase) | Ktedonobacter racemifer DSM 44963    |  |            |                                  |
| GH5 | Orpinomyces_11298 | Dock, DUF3857 | Cellulose     | endo-1,4- $\beta$ -D-glucanase (Cellulase) | Clostridiaceae bacterium AN-C16-KBRB |  | AAC06321.1 | (87)                             |
| GH5 | Orpinomyces_11551 |               | Hemicellulose | endo-1,4- $\beta$ -mannosidase             | Bacillus clausii KSM-K16             |  |            |                                  |
| GH5 | Orpinomyces_12843 |               | Cellulose     | endo-1,4- $\beta$ -D-glucanase (Cellulase) | Clostridiaceae bacterium AN-C16-KBRB |  | AEO51792.1 | cellulase [Orpinomyces sp. LT-3] |
| GH5 | Orpinomyces_13832 |               | Hemicellulose | endo-1,4- $\beta$ -mannosidase             | Thermotoga maritima MSB8             |  | AAL01213.1 | (88)                             |
| GH5 | Orpinomyces_1444  | Dock,         | Cellulose     | endo-1,4- $\beta$ -D-glucanase (Cellulase) | Eubacterium siraeum V10Sc8a          |  | Q12647.1   | (89)                             |
| GH5 | Orpinomyces_14471 |               | Cellulose     | endo-1,4- $\beta$ -D-glucanase (Cellulase) | Acidothermus cellulolyticus 11B      |  | AAL01213.1 | (88)                             |
| GH5 | Orpinomyces_1538  |               | Hemicellulose | endo-1,4- $\beta$ -mannosidase             | Thermotoga neapolitana DSM 4359      |  | AAL01213.1 | (88)                             |

|     |                   |      |           |                                            |                                      |  |            |                                  |
|-----|-------------------|------|-----------|--------------------------------------------|--------------------------------------|--|------------|----------------------------------|
| GH5 | Orpinomyces_16434 |      | Cellulose | endo-1,4- $\beta$ -D-glucanase (Cellulase) | Clostridiaceae bacterium AN-C16-KBRB |  | Q12647.1   | (89)                             |
| GH5 | Orpinomyces_16438 |      | Cellulose | endo-1,4- $\beta$ -D-glucanase (Cellulase) | Clostridiaceae bacterium AN-C16-KBRB |  | AEO51792.1 | cellulase [Orpinomyces sp. LT-3] |
| GH5 | Orpinomyces_16455 |      | Cellulose | endo-1,4- $\beta$ -D-glucanase (Cellulase) | Clostridiaceae bacterium AN-C16-KBRB |  | AEO51792.1 | cellulase [Orpinomyces sp. LT-3] |
| GH5 | Orpinomyces_16468 |      | Cellulose | endo-1,4- $\beta$ -D-glucanase (Cellulase) | Clostridiaceae bacterium AN-C16-KBRB |  | AAC05164.1 | (90)                             |
| GH5 | Orpinomyces_16486 |      | Cellulose | endo-1,4- $\beta$ -D-glucanase (Cellulase) | Clostridiaceae bacterium AN-C16-KBRB |  | Q12647.1   | (89)                             |
| GH5 | Orpinomyces_16514 | Dock | Cellulose | endo-1,4- $\beta$ -D-glucanase (Cellulase) | Ktedonobacter racemifer DSM 44963    |  |            |                                  |
| GH5 | Orpinomyces_16616 |      | Cellulose | endo-1,4- $\beta$ -D-glucanase (Cellulase) | Clostridiaceae bacterium AN-C16-KBRB |  | AAC05164.1 | (90)                             |
| GH5 | Orpinomyces_16691 | Dock | Cellulose | endo-1,4- $\beta$ -D-glucanase (Cellulase) | Clostridium sp. BNL1100              |  | AAC63094.1 | (91)                             |
| GH5 | Orpinomyces_16700 | Dock | Cellulose | endo-1,4- $\beta$ -D-glucanase (Cellulase) | Eubacterium siraeum DSM 15702        |  |            |                                  |

|     |                   |                                          |           |                                    |                                      |  |            |      |
|-----|-------------------|------------------------------------------|-----------|------------------------------------|--------------------------------------|--|------------|------|
| GH5 | Orpinomyces_16787 | Dock                                     | Cellulose | endo-1,4-β-D-glucanase (Cellulase) | Eubacterium siraeum DSM 15702        |  |            |      |
| GH5 | Orpinomyces_204   | Dock,                                    | Cellulose | endo-1,4-β-D-glucanase (Cellulase) | Ruminococcus champanellensis 18P13   |  | AAB69347.1 | (90) |
| GH5 | Orpinomyces_2345  | Dock                                     | Cellulose | endo-1,4-β-D-glucanase (Cellulase) | Paenibacillus curdlanolyticus YK9    |  |            |      |
| GH5 | Orpinomyces_2510  |                                          | Cellulose | endo-1,4-β-D-glucanase (Cellulase) | Clostridiaceae bacterium AN-C16-KBRB |  | Q12647.1   | (89) |
| GH5 | Orpinomyces_2543  | Dock                                     | Cellulose | endo-1,4-β-D-glucanase (Cellulase) | Eubacterium siraeum DSM 15702        |  |            |      |
| GH5 | Orpinomyces_2605  | Dock                                     | Cellulose | endo-1,4-β-D-glucanase (Cellulase) | Clostridium sp. BNL1100              |  | AAC63094.1 | (91) |
| GH5 | Orpinomyces_2784  |                                          | Cellulose | endo-1,4-β-D-glucanase (Cellulase) | Clostridiaceae bacterium AN-C16-KBRB |  | AAC05164.1 | (90) |
| GH5 | Orpinomyces_3851  |                                          | Cellulose | endo-1,4-β-D-glucanase (Cellulase) | Clostridiaceae bacterium AN-C16-KBRB |  | Q12647.1   | (89) |
| GH5 | Orpinomyces_3867  | Polysaccharide deacetylase, AP_endonuc_2 | Cellulose | endo-1,4-β-D-glucanase (Cellulase) | bacterium Ellin514                   |  |            |      |

|     |                  |               |           |                                            |                                      |  |            |      |
|-----|------------------|---------------|-----------|--------------------------------------------|--------------------------------------|--|------------|------|
| GH5 | Orpinomyces_4162 |               | Cellulose | endo-1,4- $\beta$ -D-glucanase (Cellulase) | Eubacterium ventriosum ATCC 27560    |  |            |      |
| GH5 | Orpinomyces_44   |               | Cellulose | endo-1,4- $\beta$ -D-glucanase (Cellulase) | Ruminococcus champanellensis 18P13   |  | Q12647.1   | (89) |
| GH5 | Orpinomyces_5086 |               | Cellulose | endo-1,4- $\beta$ -D-glucanase (Cellulase) | Ruminococcus champanellensis 18P13   |  | AAC05164.1 | (90) |
| GH5 | Orpinomyces_5811 | Dock          | Cellulose | endo-1,4- $\beta$ -D-glucanase (Cellulase) | Ruminococcus champanellensis 18P13   |  | AAC05164.1 | (90) |
| GH5 | Orpinomyces_5814 |               | Cellulose | endo-1,4- $\beta$ -D-glucanase (Cellulase) | Ruminococcus champanellensis 18P13   |  | Q12647.1   | (89) |
| GH5 | Orpinomyces_6541 | Dock, DUF3014 | Cellulose | endo-1,4- $\beta$ -D-glucanase (Cellulase) | Ralstonia syzygii R24                |  |            |      |
| GH5 | Orpinomyces_7414 | Dock          | Cellulose | endo-1,4- $\beta$ -D-glucanase (Cellulase) | Paenibacillus curdlanolyticus YK9    |  |            |      |
| GH5 | Orpinomyces_8446 | Dock          | Cellulose | endo-1,4- $\beta$ -D-glucanase (Cellulase) | Clostridiaceae bacterium AN-C16-KBRB |  | AAC06321.1 | (87) |
| GH5 | Orpinomyces_909  | Dock,         | Cellulose | endo-1,4- $\beta$ -D-glucanase (Cellulase) | Ruminococcus champanellensis 18P13   |  | AAD43818.1 | (92) |

|     |                   |      |           |                                            |                                       |  |            |      |
|-----|-------------------|------|-----------|--------------------------------------------|---------------------------------------|--|------------|------|
| GH5 | Orpinomyces_9720  | Dock | Cellulose | endo-1,4- $\beta$ -D-glucanase (Cellulase) | Myceliophthora thermophila ATCC 42464 |  | AAL01213.1 | (88) |
| GH6 | Orpinomyces_10295 |      | Cellulose | exo-cellobiohydrolase (non-reducing end)   | Neosartorya fischeri NRRL 181         |  | AAF34679.1 | (92) |
| GH6 | Orpinomyces_10614 |      | Cellulose | exo-cellobiohydrolase (non-reducing end)   | Sorangium cellulosum 'So ce 56'       |  | AAF34679.1 | (92) |
| GH6 | Orpinomyces_11639 | Dock | Cellulose | exo-cellobiohydrolase (non-reducing end)   | Sorangium cellulosum 'So ce 56'       |  | AEX92708.1 | (85) |
| GH6 | Orpinomyces_12853 |      | Cellulose | exo-cellobiohydrolase (non-reducing end)   | No hits found                         |  | AEX92716.1 | (85) |
| GH6 | Orpinomyces_1464  | Dock | Cellulose | exo-cellobiohydrolase (non-reducing end)   | Paenibacillus mucilaginosus K02       |  | AEX92715.1 | (85) |
| GH6 | Orpinomyces_16419 |      | Cellulose | exo-cellobiohydrolase (non-reducing end)   | Sorangium cellulosum 'So ce 56'       |  | AAL01211.1 | (88) |

|     |                   |           |           |                                          |                                 |  |            |                              |
|-----|-------------------|-----------|-----------|------------------------------------------|---------------------------------|--|------------|------------------------------|
| GH6 | Orpinomyces_16465 | FRD2      | Cellulose | exo-cellobiohydrolase (non-reducing end) | Neosartorya fischeri NRRL 181   |  | AAF34679.1 | (92)                         |
| GH6 | Orpinomyces_16489 |           | Cellulose | exo-cellobiohydrolase (non-reducing end) | Aspergillus clavatus NRRL 1     |  | AAC09228.1 | (93)                         |
| GH6 | Orpinomyces_16505 |           | Cellulose | exo-cellobiohydrolase (non-reducing end) | Sorangium cellulosum 'So ce 56' |  | AAF34679.1 | (92)                         |
| GH6 | Orpinomyces_16543 | FRD2      | Cellulose | exo-cellobiohydrolase (non-reducing end) | Neosartorya fischeri NRRL 181   |  | AAF34679.1 | (92)                         |
| GH6 | Orpinomyces_16562 |           | Cellulose | exo-cellobiohydrolase (non-reducing end) | Aspergillus niger               |  | AAL01211.1 | (88)                         |
| GH6 | Orpinomyces_16626 | ApoLp-III | Cellulose | exo-cellobiohydrolase (non-reducing end) | Neosartorya fischeri NRRL 181   |  | AAO47726.1 | Piromyces sp. KS11 cellulase |
| GH6 | Orpinomyces_16627 |           | Cellulose | exo-cellobiohydrolase (non-reducing end) | Phaeosphaeria nodorum SN15      |  | AEX92708.1 | (85)                         |

|     |                   |       |           |                                          |                                    |  |            |                                                                       |
|-----|-------------------|-------|-----------|------------------------------------------|------------------------------------|--|------------|-----------------------------------------------------------------------|
| GH6 | Orpinomyces_16629 |       | Cellulose | exo-cellobiohydrolase (non-reducing end) | Neosartorya fischeri NRRL 181      |  | ABY52799.1 | 1,4-beta-D-glucan-cellobiohydrolase, partial [Piromyces rhizinflatus] |
| GH6 | Orpinomyces_16639 | Dock  | Cellulose | exo-cellobiohydrolase (non-reducing end) | Paenibacillus mucilaginosus KNP414 |  | AEX92708.1 | (85)                                                                  |
| GH6 | Orpinomyces_16641 | Dock  | Cellulose | exo-cellobiohydrolase (non-reducing end) | Sorangium cellulosum 'So ce 56'    |  | AAL01211.1 | (88)                                                                  |
| GH6 | Orpinomyces_16653 | Dock  | Cellulose | exo-cellobiohydrolase (non-reducing end) | Paenibacillus mucilaginosus KNP414 |  | AEX92714.1 | (85)                                                                  |
| GH6 | Orpinomyces_16656 | Dock  | Cellulose | exo-cellobiohydrolase (non-reducing end) | Sorangium cellulosum 'So ce 56'    |  | AEX92715.1 | (85)                                                                  |
| GH6 | Orpinomyces_16776 | Dock, | Cellulose | exo-cellobiohydrolase (non-reducing end) | Sorangium cellulosum 'So ce 56'    |  | AEX92715.1 | (85)                                                                  |



|     |                   |      |           |                                          |                                           |  |            |                                    |
|-----|-------------------|------|-----------|------------------------------------------|-------------------------------------------|--|------------|------------------------------------|
| GH6 | Orpinomyces_16924 |      | Cellulose | exo-cellobiohydrolase (non-reducing end) | Neosartorya fischeri NRRL 181             |  | AAR08200.1 | CelA<br>Neocallimastix patriciarum |
| GH6 | Orpinomyces_2459  |      | Cellulose | exo-cellobiohydrolase (non-reducing end) | Sorangium cellulosum 'So ce 56'           |  | AAF34679.1 | (92)                               |
| GH6 | Orpinomyces_2901  | Dock | Cellulose | exo-cellobiohydrolase (non-reducing end) | Pyrenophora tritici-repentis Pt-1C-BFP    |  | AEX92715.1 | (85)                               |
| GH6 | Orpinomyces_3375  |      | Cellulose | exo-cellobiohydrolase (non-reducing end) | No hits found                             |  | AEX92715.1 | (85)                               |
| GH6 | Orpinomyces_3449  | Dock | Cellulose | exo-cellobiohydrolase (non-reducing end) | Xanthomonas oryzae pv. oryzae MAFF 311018 |  | AEX92708.1 | (85)                               |
| GH6 | Orpinomyces_3530  | Dock | Cellulose | exo-cellobiohydrolase (non-reducing end) | Xylella fastidiosa EB92.1                 |  | AEX92710.1 | (85)                               |
| GH6 | Orpinomyces_3583  | Dock | Cellulose | exo-cellobiohydrolase (non-reducing end) | Sorangium cellulosum 'So ce 56'           |  | AEX92708.1 | (85)                               |

|     |                  |      |           |                                          |                                 |  |            |                                    |
|-----|------------------|------|-----------|------------------------------------------|---------------------------------|--|------------|------------------------------------|
| GH6 | Orpinomyces_3813 |      | Cellulose | exo-cellobiohydrolase (non-reducing end) | Lentinula edodes                |  | AAR08200.1 | CelA<br>Neocallimastix patriciarum |
| GH6 | Orpinomyces_3857 | Dock | Cellulose | exo-cellobiohydrolase (non-reducing end) | Sorangium cellulosum 'So ce 56' |  | AEX92708.1 | (85)                               |
| GH6 | Orpinomyces_4145 | Dock | Cellulose | exo-cellobiohydrolase (non-reducing end) | Sorangium cellulosum 'So ce 56' |  | AEX92708.1 | (85)                               |
| GH6 | Orpinomyces_4503 |      | Cellulose | exo-cellobiohydrolase (non-reducing end) | Neosartorya fischeri NRRL 181   |  | AAC09228.1 | (93)                               |
| GH6 | Orpinomyces_4642 | Dock | Cellulose | exo-cellobiohydrolase (non-reducing end) | Sorangium cellulosum 'So ce 56' |  | AEX92710.1 | (85)                               |
| GH6 | Orpinomyces_4748 | Dock | Cellulose | exo-cellobiohydrolase (non-reducing end) | Sorangium cellulosum 'So ce 56' |  | AEX92710.1 | (85)                               |
| GH6 | Orpinomyces_5216 | Dock | Cellulose | exo-cellobiohydrolase (non-reducing end) | Sorangium cellulosum 'So ce 56' |  | AEX92710.1 | (85)                               |

|     |                  |                    |           |                                          |                                  |  |            |      |
|-----|------------------|--------------------|-----------|------------------------------------------|----------------------------------|--|------------|------|
| GH6 | Orpinomyces_5544 | Dock               | Cellulose | exo-cellobiohydrolase (non-reducing end) | Aspergillus niger                |  | AAM94167.1 | (94) |
| GH6 | Orpinomyces_6132 |                    | Cellulose | exo-cellobiohydrolase (non-reducing end) | Verticillium albo-atrum VaMs.102 |  | AAC09228.1 | (93) |
| GH6 | Orpinomyces_6944 | Dock               | Cellulose | exo-cellobiohydrolase (non-reducing end) | Sorangium cellulosum 'So ce 56'  |  | AEX92708.1 | (85) |
| GH6 | Orpinomyces_7034 | Dock               | Cellulose | exo-cellobiohydrolase (non-reducing end) | Paenibacillus mucilaginosus K02  |  | AEX92708.1 | (85) |
| GH6 | Orpinomyces_7615 | Dock, Peptidase_M3 | Cellulose | exo-cellobiohydrolase (non-reducing end) | Oreochromis niloticus            |  | AEX92714.1 | (85) |
| GH6 | Orpinomyces_8084 | Dock               | Cellulose | exo-cellobiohydrolase (non-reducing end) | Sorangium cellulosum 'So ce 56'  |  | AEX92716.1 | (85) |
| GH6 | Orpinomyces_8266 | Dock               | Cellulose | exo-cellobiohydrolase (non-reducing end) | Paenibacillus mucilaginosus K02  |  | AEX92710.1 | (85) |

|     |                   |      |           |                                            |                                        |  |            |      |
|-----|-------------------|------|-----------|--------------------------------------------|----------------------------------------|--|------------|------|
| GH6 | Orpinomyces_8423  | Dock | Cellulose | exo-cellobiohydrolase (non-reducing end)   | Paenibacillus mucilaginosus K02        |  | AEX92710.1 | (85) |
| GH6 | Orpinomyces_8802  | Dock | Cellulose | exo-cellobiohydrolase (non-reducing end)   | Verticillium dahliae VdLs.17           |  | AAD51054.2 | (92) |
| GH6 | Orpinomyces_903   | Dock | Cellulose | exo-cellobiohydrolase (non-reducing end)   | Pyrenophora tritici-repentis Pt-1C-BFP |  | AEX92715.1 | (85) |
| GH8 | Orpinomyces_14432 |      | Cellulose | endo-1,4- $\beta$ -D-glucanase (Cellulase) | Hahella chejuensis KCTC 2396           |  |            |      |
| GH8 | Orpinomyces_16605 |      | Cellulose | endo-1,4- $\beta$ -D-glucanase (Cellulase) | Butyrivibrio fibrisolvens 16/4         |  |            |      |
| GH9 | Orpinomyces_16430 |      | Cellulose | endo-1,4- $\beta$ -D-glucanase (Cellulase) | Flavobacteriaceae bacterium HQM9       |  | AAP30753.1 | (81) |
| GH9 | Orpinomyces_16648 | Dock | Cellulose | endo-1,4- $\beta$ -D-glucanase (Cellulase) | Kitasatospora setae KM-6054            |  | AEX92719.1 | (85) |
| GH9 | Orpinomyces_16721 | Dock | Cellulose | endo-1,4- $\beta$ -D-glucanase (Cellulase) | Kitasatospora setae KM-6054            |  | AAM81967.1 | (95) |

|     |                   |      |           |                                            |                              |  |            |      |
|-----|-------------------|------|-----------|--------------------------------------------|------------------------------|--|------------|------|
| GH9 | Orpinomyces_16732 | Dock | Cellulose | endo-1,4- $\beta$ -D-glucanase (Cellulase) | Kitasatospora setae KM-6054  |  | AEX92719.1 | (85) |
| GH9 | Orpinomyces_16778 | Dock | Cellulose | endo-1,4- $\beta$ -D-glucanase (Cellulase) | Hahella chejuensis KCTC 2396 |  | AEX92718.1 | (85) |
| GH9 | Orpinomyces_3361  | Dock | Cellulose | endo-1,4- $\beta$ -D-glucanase (Cellulase) | Kitasatospora setae KM-6054  |  | AAM81966.1 | (95) |
| GH9 | Orpinomyces_3567  | Dock | Cellulose | endo-1,4- $\beta$ -D-glucanase (Cellulase) | Thermobifida fusca           |  | AEX92718.1 | (85) |
| GH9 | Orpinomyces_5169  | Dock | Cellulose | endo-1,4- $\beta$ -D-glucanase (Cellulase) | Cellvibrio gilvu             |  | AAM81966.1 | (95) |
| GH9 | Orpinomyces_5746  |      | Cellulose | endo-1,4- $\beta$ -D-glucanase (Cellulase) | Moorea producta 3L           |  | AEX92719.1 | (85) |
| GH9 | Orpinomyces_6515  |      | Cellulose | endo-1,4- $\beta$ -D-glucanase (Cellulase) | No hits found                |  |            |      |
| GH9 | Orpinomyces_8987  | Dock | Cellulose | endo-1,4- $\beta$ -D-glucanase (Cellulase) | Kitasatospora setae KM-6054  |  | AEX92719.1 | (85) |
| GH9 | Orpinomyces_9543  | Dock | Cellulose | endo-1,4- $\beta$ -D-glucanase (Cellulase) | Kitasatospora setae KM-6054  |  | AAM81967.1 | (95) |

|      |                   |                      |               |                             |                                             |  |            |      |
|------|-------------------|----------------------|---------------|-----------------------------|---------------------------------------------|--|------------|------|
| GH10 | Orpinomyces_1160  | Dock                 | Hemicellulose | endo-1,4- $\beta$ -xylanase | Butyrivibrio proteoclasticus B316           |  |            |      |
| GH10 | Orpinomyces_11830 | Dock                 | Hemicellulose | endo-1,4- $\beta$ -xylanase | Meiothermus ruber DSM 1279                  |  | AAB30669.1 | (96) |
| GH10 | Orpinomyces_13743 |                      | Hemicellulose | endo-1,4- $\beta$ -xylanase | Meiothermus ruber DSM 1279                  |  | AAB30669.1 | (96) |
| GH10 | Orpinomyces_14446 |                      | Hemicellulose | endo-1,4- $\beta$ -xylanase | Saccharomonospora paurometabolica YIM 90007 |  | AAB30669.1 | (96) |
| GH10 | Orpinomyces_16413 |                      | Hemicellulose | endo-1,4- $\beta$ -xylanase | Cellulomonas flavigena DSM 20109            |  | AAB30669.1 | (96) |
| GH10 | Orpinomyces_16432 | Dock                 | Hemicellulose | endo-1,4- $\beta$ -xylanase | Streptomyces sviveus ATCC 29083             |  | AAB30669.1 | (96) |
| GH10 | Orpinomyces_16474 |                      | Hemicellulose | endo-1,4- $\beta$ -xylanase | Thermopolyspora flexuosa                    |  | AAB30669.1 | (96) |
| GH10 | Orpinomyces_16527 |                      | Hemicellulose | endo-1,4- $\beta$ -xylanase | Saccharomonospora azurea NA-128             |  | AAB30669.1 | (96) |
| GH10 | Orpinomyces_16669 | Dock, Ricin_B_lectin | Hemicellulose | endo-1,4- $\beta$ -xylanase | Streptomyces sviveus ATCC 29083             |  | AAB30669.1 | (96) |
| GH10 | Orpinomyces_16687 | Dock                 | Hemicellulose | endo-1,4- $\beta$ -xylanase | Butyrivibrio proteoclasticus B316           |  |            |      |

|      |                   |                      |               |                             |                                             |  |            |      |
|------|-------------------|----------------------|---------------|-----------------------------|---------------------------------------------|--|------------|------|
| GH10 | Orpinomyces_16690 | Dock                 | Hemicellulose | endo-1,4- $\beta$ -xylanase | Clostridium thermocellum DSM 2360           |  | AAB30669.1 | (96) |
| GH10 | Orpinomyces_16698 | Dock                 | Hemicellulose | endo-1,4- $\beta$ -xylanase | Saccharomonospora paurometabolica YIM 90007 |  | AAB30669.1 | (96) |
| GH10 | Orpinomyces_16766 | Dock, Ricin_B_lectin | Hemicellulose | endo-1,4- $\beta$ -xylanase | Eubacterium cellulosolvens 6                |  | AEX92721.1 | (85) |
| GH10 | Orpinomyces_16857 | Dock                 | Hemicellulose | endo-1,4- $\beta$ -xylanase | Eubacterium cellulosolvens 6                |  | AEX92721.1 | (85) |
| GH10 | Orpinomyces_16860 | Dock                 | Hemicellulose | endo-1,4- $\beta$ -xylanase | Butyrivibrio proteoclasticus B316           |  |            |      |
| GH10 | Orpinomyces_16861 | CBM1                 | Hemicellulose | endo-1,4- $\beta$ -xylanase | Meiothermus ruber DSM 1279                  |  | AAB30669.1 | (96) |
| GH10 | Orpinomyces_16894 | CBM1                 | Hemicellulose | endo-1,4- $\beta$ -xylanase | No hits found                               |  |            |      |
| GH10 | Orpinomyces_16911 | CBM1                 | Hemicellulose | endo-1,4- $\beta$ -xylanase | Butyrivibrio proteoclasticus B316           |  |            |      |
| GH10 | Orpinomyces_1983  | Dock                 | Hemicellulose | endo-1,4- $\beta$ -xylanase | Butyrivibrio proteoclasticus B316           |  |            |      |
| GH10 | Orpinomyces_2071  |                      | Hemicellulose | endo-1,4- $\beta$ -xylanase | Meiothermus ruber DSM 1279                  |  | AAB30669.1 | (96) |
| GH10 | Orpinomyces_5723  | CBM1                 | Hemicellulose | endo-1,4- $\beta$ -xylanase | Meiothermus ruber                           |  | AAB30669.1 | (96) |

|      |                   |      |               |                             |                                                  |  |            |      |
|------|-------------------|------|---------------|-----------------------------|--------------------------------------------------|--|------------|------|
| GH10 | Orpinomyces_5763  | CBM1 | Hemicellulose | endo-1,4- $\beta$ -xylanase | Meiothermus ruber DSM 1279                       |  | AAB30669.1 | (96) |
| GH10 | Orpinomyces_5899  | CBM1 | Hemicellulose | endo-1,4- $\beta$ -xylanase | Sreptomyces Lividans                             |  | AAB30669.1 | (96) |
| GH10 | Orpinomyces_6679  | Dock | Hemicellulose | endo-1,4- $\beta$ -xylanase | Butyrivibrio proteoclasticus B316                |  |            |      |
| GH10 | Orpinomyces_6742  | CBM1 | Hemicellulose | endo-1,4- $\beta$ -xylanase | No hits found                                    |  | AAB30669.1 | (96) |
| GH10 | Orpinomyces_7494  | CBM1 | Hemicellulose | endo-1,4- $\beta$ -xylanase | Verrucosipora maris AB-18-032                    |  | AAB30669.1 | (96) |
| GH10 | Orpinomyces_7686  | CBM1 | Hemicellulose | endo-1,4- $\beta$ -xylanase | Butyrivibrio proteoclasticus B316                |  |            |      |
| GH10 | Orpinomyces_808   | Dock | Hemicellulose | endo-1,4- $\beta$ -xylanase | Saccharomonospora paurometabolica YIM 90007      |  | AAB30669.1 | (96) |
| GH10 | Orpinomyces_9123  |      | Hemicellulose | endo-1,4- $\beta$ -xylanase | Verrucosipora maris AB-18-032                    |  | AAB30669.1 | (96) |
| GH10 | Orpinomyces_938   | CBM1 | Hemicellulose | endo-1,4- $\beta$ -xylanase | Actinomadura sp.                                 |  | AAB30669.1 | (96) |
| GH11 | Orpinomyces_10724 | Dock | Hemicellulose | endo-1,4- $\beta$ -xylanase | Fibrobacter succinogenes subsp. succinogenes S85 |  | ACL68347.1 | (97) |



|      |                   |      |               |                             |                                                  |  |            |                             |
|------|-------------------|------|---------------|-----------------------------|--------------------------------------------------|--|------------|-----------------------------|
| GH11 | Orpinomyces_11518 |      | Hemicellulose | endo-1,4- $\beta$ -xylanase | Fibrobacter succinogenes subsp. succinogenes S85 |  | AAF14365.1 | (98)                        |
| GH11 | Orpinomyces_1220  | Dock | Hemicellulose | endo-1,4- $\beta$ -xylanase | Fibrobacter succinogenes subsp. succinogenes S85 |  | Q12667.1   | (99)                        |
| GH11 | Orpinomyces_13040 |      | Hemicellulose | endo-1,4- $\beta$ -xylanase | Fibrobacter succinogenes subsp. succinogenes S85 |  | CAA57820.1 | (100)                       |
| GH11 | Orpinomyces_13274 |      | Hemicellulose | endo-1,4- $\beta$ -xylanase | Fibrobacter succinogenes subsp. succinogenes S85 |  | CAA57820.1 | (100)                       |
| GH11 | Orpinomyces_1396  | Dock | Hemicellulose | endo-1,4- $\beta$ -xylanase | Fibrobacter succinogenes subsp. succinogenes S85 |  | Q12667.1   | (99)                        |
| GH11 | Orpinomyces_15347 |      | Hemicellulose | endo-1,4- $\beta$ -xylanase | Fibrobacter succinogenes subsp. succinogenes S85 |  | AAG18439.1 | Piromyces communis xylanase |
| GH11 | Orpinomyces_16423 |      | Hemicellulose | endo-1,4- $\beta$ -xylanase | Fibrobacter succinogenes subsp. succinogenes S85 |  | AAF14365.1 | (98)                        |

|      |                   |                                                                      |               |                             |                                                  |  |            |                             |
|------|-------------------|----------------------------------------------------------------------|---------------|-----------------------------|--------------------------------------------------|--|------------|-----------------------------|
| GH11 | Orpinomyces_16454 |                                                                      | Hemicellulose | endo-1,4- $\beta$ -xylanase | Fibrobacter succinogenes subsp. succinogenes S85 |  | AAF14365.1 | (98)                        |
| GH11 | Orpinomyces_16458 |                                                                      | Hemicellulose | endo-1,4- $\beta$ -xylanase | Fibrobacter succinogenes subsp. succinogenes S85 |  | AAF14365.1 | (98)                        |
| GH11 | Orpinomyces_16510 | Dock, Polysaccharide deacetylase, DUF915, Esterase_phd, Peptidase_S9 | Hemicellulose | endo-1,4- $\beta$ -xylanase | Fibrobacter succinogenes subsp. succinogenes S85 |  | ACL68347.1 | (97)                        |
| GH11 | Orpinomyces_16518 |                                                                      | Hemicellulose | endo-1,4- $\beta$ -xylanase | No hits found                                    |  | AAF14365.1 | (98)                        |
| GH11 | Orpinomyces_16520 | Polysaccharide deacetylase, Herpes_BLLF1                             | Hemicellulose | endo-1,4- $\beta$ -xylanase | Fibrobacter succinogenes subsp. succinogenes S85 |  | AAG18439.1 | Piromyces communis xylanase |
| GH11 | Orpinomyces_16525 |                                                                      | Hemicellulose | endo-1,4- $\beta$ -xylanase | Fibrobacter succinogenes subsp. succinogenes S85 |  | AAF14365.1 | (98)                        |

|      |                   |  |               |                             |                                                  |  |            |                             |
|------|-------------------|--|---------------|-----------------------------|--------------------------------------------------|--|------------|-----------------------------|
| GH11 | Orpinomyces_16526 |  | Hemicellulose | endo-1,4- $\beta$ -xylanase | Fibrobacter succinogenes subsp. succinogenes S85 |  | AAF14365.1 | (98)                        |
| GH11 | Orpinomyces_16531 |  | Hemicellulose | endo-1,4- $\beta$ -xylanase | Fibrobacter succinogenes subsp. succinogenes S85 |  | AAG18439.1 | Piromyces communis xylanase |
| GH11 | Orpinomyces_16563 |  | Hemicellulose | endo-1,4- $\beta$ -xylanase | Fibrobacter succinogenes subsp. succinogenes S85 |  | CAA57820.1 | (100)                       |
| GH11 | Orpinomyces_16564 |  | Hemicellulose | endo-1,4- $\beta$ -xylanase | Fibrobacter succinogenes subsp. succinogenes S85 |  | AAF14365.1 | (98)                        |
| GH11 | Orpinomyces_16572 |  | Hemicellulose | endo-1,4- $\beta$ -xylanase | Fibrobacter succinogenes subsp. succinogenes S85 |  | AAG18439.1 | Piromyces communis xylanase |
| GH11 | Orpinomyces_16574 |  | Hemicellulose | endo-1,4- $\beta$ -xylanase | Fibrobacter succinogenes subsp. succinogenes S85 |  | Q12667.1   | (99)                        |
| GH11 | Orpinomyces_16625 |  | Hemicellulose | endo-1,4- $\beta$ -xylanase | Fibrobacter succinogenes subsp. succinogenes S85 |  | AAF14365.1 | (98)                        |

|      |                   |                                        |               |                                 |                                                           |  |            |       |
|------|-------------------|----------------------------------------|---------------|---------------------------------|-----------------------------------------------------------|--|------------|-------|
| GH11 | Orpinomyces_16651 | Dock,<br>Polysaccharide<br>deacetylase | Hemicellulose | endo-1,4- $\beta$ -<br>xylanase | Fibrobacter<br>succinogenes<br>subsp.<br>succinogenes S85 |  | Q12667.1   | (99)  |
| GH11 | Orpinomyces_16755 | Dock                                   | Hemicellulose | endo-1,4- $\beta$ -<br>xylanase | Fibrobacter<br>succinogenes<br>subsp.<br>succinogenes S85 |  | CAA57820.1 | (100) |
| GH11 | Orpinomyces_16793 | Dock                                   | Hemicellulose | endo-1,4- $\beta$ -<br>xylanase | Fibrobacter<br>succinogenes<br>subsp.<br>succinogenes S85 |  | AAF14365.1 | (98)  |
| GH11 | Orpinomyces_16866 | CBM1                                   | Hemicellulose | endo-1,4- $\beta$ -<br>xylanase | Fibrobacter<br>succinogenes<br>subsp.<br>succinogenes S85 |  | AAF14365.1 | (98)  |
| GH11 | Orpinomyces_16874 | CBM1                                   | Hemicellulose | endo-1,4- $\beta$ -<br>xylanase | Fibrobacter<br>succinogenes<br>subsp.<br>succinogenes S85 |  | Q12667.1   | (99)  |
| GH11 | Orpinomyces_16909 | CBM1                                   | Hemicellulose | endo-1,4- $\beta$ -<br>xylanase | Fibrobacter<br>succinogenes<br>subsp.<br>succinogenes S85 |  | AAF14365.1 | (98)  |
| GH11 | Orpinomyces_16919 | CBM1                                   | Hemicellulose | endo-1,4- $\beta$ -<br>xylanase | Fibrobacter<br>succinogenes<br>subsp.<br>succinogenes S85 |  | AAF14365.1 | (98)  |

|      |                   |      |               |                             |                                                  |  |            |                             |
|------|-------------------|------|---------------|-----------------------------|--------------------------------------------------|--|------------|-----------------------------|
| GH11 | Orpinomyces_16926 | CBM1 | Hemicellulose | endo-1,4- $\beta$ -xylanase | Fibrobacter succinogenes subsp. succinogenes S85 |  | AAF14365.1 | (98)                        |
| GH11 | Orpinomyces_16927 | CBM1 | Hemicellulose | endo-1,4- $\beta$ -xylanase | Fibrobacter succinogenes subsp. succinogenes S85 |  | AAF14365.1 | (98)                        |
| GH11 | Orpinomyces_16928 | CBM1 | Hemicellulose | endo-1,4- $\beta$ -xylanase | Fibrobacter succinogenes subsp. succinogenes S85 |  | AAF14365.1 | (98)                        |
| GH11 | Orpinomyces_16937 | CBM1 | Hemicellulose | endo-1,4- $\beta$ -xylanase | Fibrobacter succinogenes subsp. succinogenes S85 |  | AAF14365.1 | (98)                        |
| GH11 | Orpinomyces_16938 | CBM1 | Hemicellulose | endo-1,4- $\beta$ -xylanase | Fibrobacter succinogenes subsp. succinogenes S85 |  | CAA57820.1 | (100)                       |
| GH11 | Orpinomyces_1946  |      | Hemicellulose | endo-1,4- $\beta$ -xylanase | Fibrobacter succinogenes subsp. succinogenes S85 |  | AAG18439.1 | Piromyces communis xylanase |
| GH11 | Orpinomyces_2012  |      | Hemicellulose | endo-1,4- $\beta$ -xylanase | Fibrobacter succinogenes subsp. succinogenes S85 |  | AAF14365.1 | (98)                        |

|      |                  |      |               |                             |                                                  |  |            |                             |
|------|------------------|------|---------------|-----------------------------|--------------------------------------------------|--|------------|-----------------------------|
| GH11 | Orpinomyces_2909 |      | Hemicellulose | endo-1,4- $\beta$ -xylanase | Fibrobacter succinogenes subsp. succinogenes S85 |  | AAG18439.1 | Piromyces communis xylanase |
| GH11 | Orpinomyces_3040 |      | Hemicellulose | endo-1,4- $\beta$ -xylanase | Fibrobacter succinogenes subsp. succinogenes S85 |  | Q12667.1   | (99)                        |
| GH11 | Orpinomyces_3043 |      | Hemicellulose | endo-1,4- $\beta$ -xylanase | Fibrobacter succinogenes subsp. succinogenes S85 |  | CAA57820.1 | (100)                       |
| GH11 | Orpinomyces_4849 |      | Hemicellulose | endo-1,4- $\beta$ -xylanase | Fibrobacter succinogenes subsp. succinogenes S85 |  | CAA57820.1 | (100)                       |
| GH11 | Orpinomyces_4868 | CBM1 | Hemicellulose | endo-1,4- $\beta$ -xylanase | Fibrobacter succinogenes subsp. succinogenes S85 |  | AAF14365.1 | (98)                        |
| GH11 | Orpinomyces_5426 |      | Hemicellulose | endo-1,4- $\beta$ -xylanase | Fibrobacter succinogenes subsp. succinogenes S85 |  | CAA57820.1 | (100)                       |
| GH11 | Orpinomyces_5512 |      | Hemicellulose | endo-1,4- $\beta$ -xylanase | Fibrobacter succinogenes subsp. succinogenes S85 |  | AAG18439.1 | Piromyces communis xylanase |

|      |                   |                            |               |                             |                                                           |  |            |       |
|------|-------------------|----------------------------|---------------|-----------------------------|-----------------------------------------------------------|--|------------|-------|
| GH11 | Orpinomyces_5933  |                            | Hemicellulose | endo-1,4- $\beta$ -xylanase | Fibrobacter succinogenes subsp. succinogenes S85          |  | CAA57820.1 | (100) |
| GH11 | Orpinomyces_6955  | CBM1                       | Hemicellulose | endo-1,4- $\beta$ -xylanase | Fibrobacter succinogenes subsp. succinogenes S85          |  | AAF14365.1 | (98)  |
| GH11 | Orpinomyces_7134  | Polysaccharide deacetylase | Hemicellulose | endo-1,4- $\beta$ -xylanase | Fibrobacter succinogenes subsp. succinogenes S85          |  | CAA57820.1 | (100) |
| GH11 | Orpinomyces_7606  |                            | Hemicellulose | endo-1,4- $\beta$ -xylanase | Fibrobacter succinogenes subsp. succinogenes S85          |  | CAA57820.1 | (100) |
| GH13 | Orpinomyces_11877 |                            | Starch        | $\alpha$ -Amylase           | Botryotinia fuckeliana                                    |  |            |       |
| GH13 | Orpinomyces_16426 |                            | Starch        | $\alpha$ -Amylase           | Streptococcus gallolyticus subsp. gallolyticus ATCC 43143 |  |            |       |
| GH13 | Orpinomyces_16441 |                            | Starch        | $\alpha$ -Amylase           | Paenibacillus sp. Aloe-11                                 |  |            |       |
| GH13 | Orpinomyces_16495 |                            | Starch        | $\alpha$ -Amylase           | Grimontia hollisae CIP 101886                             |  |            |       |

|      |                   |         |               |                                          |                                                              |  |  |
|------|-------------------|---------|---------------|------------------------------------------|--------------------------------------------------------------|--|--|
| GH13 | Orpinomyces_16503 |         | Starch        | $\alpha$ -Amylase                        | Streptococcus dysgalactiae subsp. equisimilis SK1250         |  |  |
| GH13 | Orpinomyces_16506 | DUF3830 | Starch        | $\alpha$ -Amylase                        | Bacillus subtilis subsp. subtilis str. 168                   |  |  |
| GH13 | Orpinomyces_3185  |         | Starch        | $\alpha$ -Amylase                        | Bacillus sp. KR-8104                                         |  |  |
| GH13 | Orpinomyces_3241  |         | Starch        | $\alpha$ -Amylase                        | Pyrenophora tritici-repentis Pt-1C-BFP                       |  |  |
| GH13 | Orpinomyces_3479  |         | Starch        | $\alpha$ -Amylase                        | Bacillus atrophaeus 1942                                     |  |  |
| GH13 | Orpinomyces_5526  | CBM25   | Starch        | $\alpha$ -Amylase                        | Streptococcus gallolyticus subsp. gallolyticus ATCC BAA-2069 |  |  |
| GH13 | Orpinomyces_5986  | CBM25   | Starch        | $\alpha$ -Amylase                        | Streptococcus gallolyticus subsp. gallolyticus TX20005       |  |  |
| GH13 | Orpinomyces_675   | CBM48   | Starch        | $\alpha$ -Amylase                        | Neurospora crassa OR74A                                      |  |  |
| GH13 | Orpinomyces_7289  |         | Starch        | $\alpha$ -Amylase                        | Paenibacillus sp. Aloe-11                                    |  |  |
| GH16 | Orpinomyces_14946 |         | Hemicellulose | $\beta$ -(1,3-1,4)-glucanase (Lichenase) | Maricaulis maris MCS10                                       |  |  |



|      |                   |       |               |                                          |                                |  |            |                                  |
|------|-------------------|-------|---------------|------------------------------------------|--------------------------------|--|------------|----------------------------------|
| GH16 | Orpinomyces_16436 |       | Hemicellulose | $\beta$ -(1,3-1,4)-glucanase (Lichenase) | Maricaulis maris MCS10         |  |            |                                  |
| GH16 | Orpinomyces_16490 |       | Hemicellulose | $\beta$ -(1,3-1,4)-glucanase (Lichenase) | Maricaulis maris MCS10         |  |            |                                  |
| GH16 | Orpinomyces_16614 |       | Hemicellulose | $\beta$ -(1,3-1,4)-glucanase (Lichenase) | Streptococcus equinus          |  | AAQ09257.1 | lichenase [Anaeromyces sp. W-98] |
| GH16 | Orpinomyces_16615 |       | Hemicellulose | $\beta$ -(1,3-1,4)-glucanase (Lichenase) | Streptococcus equinus          |  | AAQ09257.1 | lichenase [Anaeromyces sp. W-98] |
| GH16 | Orpinomyces_16635 |       | Hemicellulose | $\beta$ -(1,3-1,4)-glucanase (Lichenase) | Streptococcus equinus          |  | AAQ09257.1 | lichenase [Anaeromyces sp. W-98] |
| GH16 | Orpinomyces_16636 |       | Hemicellulose | $\beta$ -(1,3-1,4)-glucanase (Lichenase) | Streptococcus equinus          |  | AAQ09257.1 | lichenase [Anaeromyces sp. W-98] |
| GH16 | Orpinomyces_3308  |       | Hemicellulose | $\beta$ -(1,3-1,4)-glucanase (Lichenase) | Maricaulis maris MCS10         |  |            |                                  |
| GH16 | Orpinomyces_5528  |       | Hemicellulose | $\beta$ -(1,3-1,4)-glucanase (Lichenase) | Chitinophaga pinensis DSM 2588 |  |            |                                  |
| GH18 | Orpinomyces_10945 | CBM18 | Chitin        | Chitinase                                | Paenibacillus elgii B69        |  |            |                                  |
| GH18 | Orpinomyces_13782 |       | Chitin        | Chitinase                                | Bacillus sp. m3-13             |  |            |                                  |

|      |                   |                                      |               |                                |                                                  |  |            |      |
|------|-------------------|--------------------------------------|---------------|--------------------------------|--------------------------------------------------|--|------------|------|
| GH18 | Orpinomyces_16580 |                                      | Chitin        | Chitinase                      | Pandora neoaphidis                               |  |            |      |
| GH18 | Orpinomyces_16609 |                                      | Chitin        | Chitinase                      | Batrachochytrium dendrobatidis JAM81             |  |            |      |
| GH18 | Orpinomyces_16634 |                                      | Chitin        | Chitinase                      | Desmospora sp. 8437                              |  |            |      |
| GH18 | Orpinomyces_16683 | Dock                                 | Chitin        | Chitinase                      | No hits found                                    |  |            |      |
| GH18 | Orpinomyces_8445  | CBM18                                | Chitin        | Chitinase                      | Metarhizium acridum CQMa 102                     |  |            |      |
| GH25 | Orpinomyces_6304  |                                      | Peptidoglycan | Lysozyme                       | Lachnospiraceae bacterium 3_1_57FAA_CT1          |  |            |      |
| GH26 | Orpinomyces_16411 |                                      | Hemicellulose | endo-1,4- $\beta$ -mannosidase | Dictyoglomus thermophilum H-6-12                 |  |            |      |
| GH26 | Orpinomyces_16586 |                                      | Hemicellulose | endo-1,4- $\beta$ -mannosidase | Fibrobacter succinogenes subsp. succinogenes S85 |  |            |      |
| GH26 | Orpinomyces_16611 | DUF1208, Hydrolase_3, PepSY, Rho_GDI | Hemicellulose | endo-1,4- $\beta$ -mannosidase | Neosartorya fischeri NRRL 181                    |  | AAC09228.1 | (93) |
| GH26 | Orpinomyces_16850 | Dock,                                | Hemicellulose | endo-1,4- $\beta$ -mannosidase | Acetivibrio cellulolyticus CD2                   |  | P55297.1   | (99) |

|      |                   |         |                                                                         |                                |                                 |  |          |      |
|------|-------------------|---------|-------------------------------------------------------------------------|--------------------------------|---------------------------------|--|----------|------|
| GH26 | Orpinomyces_5113  |         | Hemicellulose                                                           | endo-1,4- $\beta$ -mannosidase | Dysgonomonas gadei ATCC BAA-286 |  | P55296.1 | (99) |
| GH31 | Orpinomyces_10928 |         | Starch, (1 $\rightarrow$ 4)-linked $\alpha$ -D-glucose oligosaccharides | $\alpha$ -glucosidase          | Trichoplax adhaerens            |  |          |      |
| GH31 | Orpinomyces_1225  | Trefoil | Starch, (1 $\rightarrow$ 4)-linked $\alpha$ -D-glucose oligosaccharides | $\alpha$ -glucosidase          | Amphimedon queenslandica        |  |          |      |
| GH31 | Orpinomyces_13033 |         | Starch, (1 $\rightarrow$ 4)-linked $\alpha$ -D-glucose oligosaccharides | $\alpha$ -glucosidase          | No hits found                   |  |          |      |
| GH31 | Orpinomyces_15985 | Trefoil | Starch, (1 $\rightarrow$ 4)-linked $\alpha$ -D-glucose oligosaccharides | $\alpha$ -glucosidase          | Mortierella alliacea            |  |          |      |
| GH31 | Orpinomyces_16178 | Trefoil | Starch, (1 $\rightarrow$ 4)-linked $\alpha$ -D-glucose oligosaccharides | $\alpha$ -glucosidase          | Amphimedon queenslandica        |  |          |      |
| GH31 | Orpinomyces_16227 | Trefoil | Starch, (1 $\rightarrow$ 4)-linked $\alpha$ -D-glucose oligosaccharides | $\alpha$ -glucosidase          | Amphimedon queenslandica        |  |          |      |

|      |                   |         |                                                                        |                       |                                         |  |  |
|------|-------------------|---------|------------------------------------------------------------------------|-----------------------|-----------------------------------------|--|--|
| GH31 | Orpinomyces_16421 | Trefoil | Starch,<br>(1→4)-linked<br>$\alpha$ -D-glucose<br>oligosaccharid<br>es | $\alpha$ -glucosidase | Amphimedon<br>queenslandica             |  |  |
| GH31 | Orpinomyces_16431 | Trefoil | Starch,<br>(1→4)-linked<br>$\alpha$ -D-glucose<br>oligosaccharid<br>es | $\alpha$ -glucosidase | Podospora<br>anserina S mat+            |  |  |
| GH31 | Orpinomyces_16442 |         | Starch,<br>(1→4)-linked<br>$\alpha$ -D-glucose<br>oligosaccharid<br>es | $\alpha$ -glucosidase | Mycosphaerella<br>graminicola<br>IPO323 |  |  |
| GH31 | Orpinomyces_16498 | Trefoil | Starch,<br>(1→4)-linked<br>$\alpha$ -D-glucose<br>oligosaccharid<br>es | $\alpha$ -glucosidase | Mortierella<br>alliacea                 |  |  |
| GH31 | Orpinomyces_16517 | Trefoil | Starch,<br>(1→4)-linked<br>$\alpha$ -D-glucose<br>oligosaccharid<br>es | $\alpha$ -glucosidase | Trichoplax<br>adhaerens                 |  |  |
| GH31 | Orpinomyces_16528 |         | Starch,<br>(1→4)-linked<br>$\alpha$ -D-glucose<br>oligosaccharid<br>es | $\alpha$ -glucosidase | Amphimedon<br>queenslandica             |  |  |
| GH31 | Orpinomyces_16537 |         | Starch,<br>(1→4)-linked<br>$\alpha$ -D-glucose                         | $\alpha$ -glucosidase | Schizosaccharomy<br>ces pombe           |  |  |

|      |                   |                |                                                   |               |                           |  |  |
|------|-------------------|----------------|---------------------------------------------------|---------------|---------------------------|--|--|
|      |                   |                | oligosaccharides                                  |               |                           |  |  |
| GH31 | Orpinomyces_16541 |                | Starch, (1→4)-linked α-D-glucose oligosaccharides | α-glucosidase | Schizosaccharomyces pombe |  |  |
| GH31 | Orpinomyces_16548 |                | Starch, (1→4)-linked α-D-glucose oligosaccharides | α-glucosidase | Schizosaccharomyces pombe |  |  |
| GH31 | Orpinomyces_2368  |                | Starch, (1→4)-linked α-D-glucose oligosaccharides | α-glucosidase | Trichoplax adhaerens      |  |  |
| GH31 | Orpinomyces_3125  |                | Starch, (1→4)-linked α-D-glucose oligosaccharides | α-glucosidase | Schizosaccharomyces pombe |  |  |
| GH31 | Orpinomyces_4334  | Trefoil, Mucin | Starch, (1→4)-linked α-D-glucose oligosaccharides | α-glucosidase | Amphimedon queenslandica  |  |  |
| GH31 | Orpinomyces_8795  | Trefoil        | Starch, (1→4)-linked α-D-glucose oligosaccharides | α-glucosidase | Trichoplax adhaerens      |  |  |

|      |                   |               |                                                                        |                       |                                         |  |  |  |
|------|-------------------|---------------|------------------------------------------------------------------------|-----------------------|-----------------------------------------|--|--|--|
| GH31 | Orpinomyces_9302  | Trefoil       | Starch,<br>(1→4)-linked<br>$\alpha$ -D-glucose<br>oligosaccharid<br>es | $\alpha$ -glucosidase | Trichoplax<br>adhaerens                 |  |  |  |
| GH31 | Orpinomyces_9628  |               | Starch,<br>(1→4)-linked<br>$\alpha$ -D-glucose<br>oligosaccharid<br>es | $\alpha$ -glucosidase | Trichoplax<br>adhaerens                 |  |  |  |
| GH31 | Orpinomyces_9629  | Trefoil       | Starch,<br>(1→4)-linked<br>$\alpha$ -D-glucose<br>oligosaccharid<br>es | $\alpha$ -glucosidase | Amphimedon<br>queenslandica             |  |  |  |
| GH32 | Orpinomyces_16603 |               | Other<br>(fructose-<br>containing<br>polysaccharid<br>es)              | $\beta$ -fructosidase | Butyrivibrio<br>proteoclasticus<br>B316 |  |  |  |
| GH32 | Orpinomyces_1931  | Cadherin-like | Other<br>(fructose-<br>containing<br>polysaccharid<br>es)              | Unknown               | No hits found                           |  |  |  |
| GH38 | Orpinomyces_16429 |               | Other                                                                  | $\alpha$ -mannosidase | No hits found                           |  |  |  |
| GH39 | Orpinomyces_16452 |               | Hemicellulose                                                          | $\beta$ -xylosidase   | Clostridium sp.<br>DL-VIII              |  |  |  |
| GH39 | Orpinomyces_16509 |               | Hemicellulose                                                          | $\beta$ -xylosidase   | Clostridium sp.<br>DL-VIII              |  |  |  |

|      |                   |                      |               |                             |                                  |  |            |      |
|------|-------------------|----------------------|---------------|-----------------------------|----------------------------------|--|------------|------|
| GH39 | Orpinomyces_16769 | Dock, Ricin-B-lectin | Hemicellulose | $\beta$ -xylosidase         | Clostridium sp. DL-VIII          |  |            |      |
| GH39 | Orpinomyces_2939  |                      | Hemicellulose | $\beta$ -xylosidase         | Clostridium sp. DL-VIII          |  |            |      |
| GH43 | Orpinomyces_1088  | Dock, Ricin_B_lectin | Hemicellulose | alpha-N-arabinofuranosidase | Clostridium lentocellum DSM 5427 |  | AEX92721.1 | (85) |
| GH43 | Orpinomyces_13498 |                      | Hemicellulose | $\beta$ -xylosidase         | Eubacterium cellulosolvens 6     |  |            |      |
| GH43 | Orpinomyces_13906 |                      | Hemicellulose | $\beta$ -xylosidase         | Cellovibrio japonicus Ueda107    |  |            |      |
| GH43 | Orpinomyces_14143 |                      | Hemicellulose | endo-1,4- $\beta$ -xylanase | Cellulosilyticum ruminicola      |  |            |      |
| GH43 | Orpinomyces_15144 |                      | Hemicellulose | $\beta$ -xylosidase         | Prevotella ruminicola 23         |  |            |      |
| GH43 | Orpinomyces_16449 |                      | Hemicellulose | alpha-N-arabinofuranosidase | Clostridium lentocellum DSM 5427 |  |            |      |
| GH43 | Orpinomyces_16453 |                      | Hemicellulose | endo-1,4- $\beta$ -xylanase | Cellulosilyticum ruminicola      |  |            |      |
| GH43 | Orpinomyces_16512 | Ricin_B_lectin       | Hemicellulose | Alpha-N-arabinofuranosidase | Ruminococcus flavefaciens FD-1   |  |            |      |
| GH43 | Orpinomyces_16539 |                      | Hemicellulose | hypothetical protein        | Spirochaeta thermophila DSM 6192 |  |            |      |

|      |                   |                      |               |                                         |                                   |  |            |      |
|------|-------------------|----------------------|---------------|-----------------------------------------|-----------------------------------|--|------------|------|
| GH43 | Orpinomyces_16570 |                      | Hemicellulose | alpha-N-arabinofuranosidase             | Clostridium lentocellum DSM 5427  |  |            |      |
| GH43 | Orpinomyces_16579 |                      | Hemicellulose | $\beta$ -xylosidase/arabinofuranosidase | Butyrivibrio proteoclasticus B316 |  |            |      |
| GH43 | Orpinomyces_16597 |                      | Hemicellulose | $\beta$ -xylosidase/arabinofuranosidase | Butyrivibrio proteoclasticus B316 |  |            |      |
| GH43 | Orpinomyces_16617 |                      | Hemicellulose | $\beta$ -xylosidase/arabinofuranosidase | Butyrivibrio proteoclasticus B316 |  |            |      |
| GH43 | Orpinomyces_16620 |                      | Hemicellulose | $\beta$ -xylosidase/arabinofuranosidase | Butyrivibrio proteoclasticus B316 |  |            |      |
| GH43 | Orpinomyces_16799 | Dock, Ricin_B_lectin | Hemicellulose | alpha-N-arabinofuranosidase             | Clostridium lentocellum DSM 5427  |  | AEX92721.1 | (85) |
| GH43 | Orpinomyces_16828 | Dock, Ricin_B_lectin | Hemicellulose | alpha-N-arabinofuranosidase             | Clostridium lentocellum DSM 5427  |  | AEX92721.1 | (85) |
| GH43 | Orpinomyces_16879 |                      | Hemicellulose | alpha-N-arabinofuranosidase             | Clostridium lentocellum DSM 5427  |  | AEX92721.1 | (85) |
| GH43 | Orpinomyces_16895 |                      | Hemicellulose | No hits found                           | No hits found                     |  |            |      |
| GH43 | Orpinomyces_2136  |                      | Hemicellulose | alpha-N-arabinofuranosidase             | Ruminococcus flavefaciens FD-1    |  |            |      |



|      |                   |                                   |               |                                            |                                  |  |            |       |
|------|-------------------|-----------------------------------|---------------|--------------------------------------------|----------------------------------|--|------------|-------|
| GH43 | Orpinomyces_2841  |                                   | Hemicellulose | alpha-N-arabinofuranosidase                | Clostridium lentocellum DSM 5427 |  | AEX92721.1 | (85)  |
| GH43 | Orpinomyces_3146  | Dock, Ricin_B_lectin/ Trypan_PARP | Hemicellulose | alpha-N-arabinofuranosidase                | Clostridium lentocellum DSM 5427 |  | AEX92721.1 | (85)  |
| GH43 | Orpinomyces_3639  |                                   | Hemicellulose | alpha-N-arabinofuranosidase                | Clostridium lentocellum DSM 5427 |  | AEX92721.1 | (85)  |
| GH43 | Orpinomyces_4292  |                                   | Hemicellulose | alpha-N-arabinofuranosidase                | Clostridium lentocellum DSM 5427 |  |            |       |
| GH43 | Orpinomyces_5980  |                                   | Hemicellulose | putative lipoprotein                       | Ruminococcus albus 8             |  |            |       |
| GH43 | Orpinomyces_6516  |                                   | Hemicellulose | alpha-N-arabinofuranosidase                | Ruminococcus flavefaciens FD-1   |  |            |       |
| GH43 | Orpinomyces_843   |                                   | Hemicellulose | $\beta$ -xylosidase                        | Amycolatopsis mediterranei U32   |  |            |       |
| GH43 | Orpinomyces_8634  | Ricin_B_lectin                    | Hemicellulose | alpha-N-arabinofuranosidase                | Clostridium lentocellum DSM 5427 |  | AEX92721.1 | (85)  |
| GH45 | Orpinomyces_16477 | Dock                              | Cellulose     | endo-1,4- $\beta$ -D-glucanase (Cellulase) | Syncephalastrum racemosum        |  | CAB92325.1 | (101) |
| GH45 | Orpinomyces_16488 |                                   | Cellulose     | endo-1,4- $\beta$ -D-glucanase (Cellulase) | No hits found                    |  |            |       |

|      |                   |      |           |                                            |                           |  |            |       |
|------|-------------------|------|-----------|--------------------------------------------|---------------------------|--|------------|-------|
| GH45 | Orpinomyces_16521 |      | Cellulose | endo-1,4- $\beta$ -D-glucanase (Cellulase) | Rhizopus oryzae RA 99-880 |  | CAB92325.1 | (101) |
| GH45 | Orpinomyces_16533 | Dock | Cellulose | endo-1,4- $\beta$ -D-glucanase (Cellulase) | Rhizopus oryzae RA 99-880 |  | CAB92325.1 | (101) |
| GH45 | Orpinomyces_16613 |      | Cellulose | endo-1,4- $\beta$ -D-glucanase (Cellulase) | No hits found             |  |            |       |
| GH45 | Orpinomyces_16658 | Dock | Cellulose | endo-1,4- $\beta$ -D-glucanase (Cellulase) | Rhizopus oryzae RA 99-880 |  | CAB92325.1 | (101) |
| GH45 | Orpinomyces_16718 | Dock | Cellulose | endo-1,4- $\beta$ -D-glucanase (Cellulase) | No hits found             |  | CAB92325.1 | (101) |
| GH45 | Orpinomyces_16773 | Dock | Cellulose | endo-1,4- $\beta$ -D-glucanase (Cellulase) | Rhizopus oryzae RA 99-880 |  | CAB92325.1 | (101) |
| GH45 | Orpinomyces_1749  |      | Cellulose | endo-1,4- $\beta$ -D-glucanase (Cellulase) | Rhizopus oryzae           |  | CAB92325.1 | (101) |
| GH45 | Orpinomyces_2252  | Dock | Cellulose | endo-1,4- $\beta$ -D-glucanase (Cellulase) | No hits found             |  | CAB92325.1 | (101) |
| GH45 | Orpinomyces_4393  |      | Cellulose | endo-1,4- $\beta$ -D-glucanase (Cellulase) | Rhizopus oryzae           |  |            |       |

|      |                   |      |           |                                            |                                    |  |            |       |
|------|-------------------|------|-----------|--------------------------------------------|------------------------------------|--|------------|-------|
| GH45 | Orpinomyces_524   | Dock | Cellulose | endo-1,4- $\beta$ -D-glucanase (Cellulase) | Rhizopus oryzae RA 99-880          |  | CAB92325.1 | (101) |
| GH45 | Orpinomyces_5778  |      | Cellulose | endo-1,4- $\beta$ -D-glucanase (Cellulase) | Rhizopus oryzae RA 99-880          |  | CAB92325.1 | (101) |
| GH45 | Orpinomyces_6562  | Dock | Cellulose | endo-1,4- $\beta$ -D-glucanase (Cellulase) | Rhizopus oryzae RA 99-880          |  | CAB92325.1 | (101) |
| GH45 | Orpinomyces_7825  | Dock | Cellulose | endo-1,4- $\beta$ -D-glucanase (Cellulase) | No hits found                      |  | CAB92325.1 | (101) |
| GH45 | Orpinomyces_7870  | Dock | Cellulose | endo-1,4- $\beta$ -D-glucanase (Cellulase) | Rhizopus oryzae RA 99-880          |  | CAB92325.1 | (101) |
| GH47 | Orpinomyces_16599 |      | Other     | alpha-mannosidase(ER)                      | Ixodes scapularis                  |  |            |       |
| GH47 | Orpinomyces_2189  |      | Other     | Unknown (Conserved hypothetical protein)   | Schizophyllum commune H4-8         |  |            |       |
| GH48 | Orpinomyces_10796 | Dock | Cellulose | exo-cellobiohydrolase (reducing end)       | Streptomyces bingchenggensis BCW-1 |  | AEX92722.1 | (85)  |

|      |                   |      |           |                                      |                                                     |  |            |       |
|------|-------------------|------|-----------|--------------------------------------|-----------------------------------------------------|--|------------|-------|
| GH48 | Orpinomyces_1263  |      | Cellulose | exo-cellobiohydrolase (reducing end) | Streptosporangium roseum DSM 43021                  |  | AEX92722.1 | (85)  |
| GH48 | Orpinomyces_15099 |      | Cellulose | exo-cellobiohydrolase (reducing end) | Streptosporangium roseum DSM 43021                  |  | AEX92722.1 | (85)  |
| GH48 | Orpinomyces_16424 |      | Cellulose | exo-cellobiohydrolase (reducing end) | Streptosporangium roseum DSM 43021                  |  | AEX92722.1 | (85)  |
| GH48 | Orpinomyces_16646 | Dock | Cellulose | exo-cellobiohydrolase (reducing end) | Catenulispora acidiphila DSM 44928                  |  | AAN76735.1 | (102) |
| GH48 | Orpinomyces_16647 | Dock | Cellulose | exo-cellobiohydrolase (reducing end) | No hits found                                       |  | AEX92722.1 | (85)  |
| GH48 | Orpinomyces_16679 | Dock | Cellulose | exo-cellobiohydrolase (reducing end) | Streptomyces hygrosopicus subsp. jinggangensis 5008 |  | AEX92722.1 | (85)  |
| GH48 | Orpinomyces_16682 | Dock | Cellulose | exo-cellobiohydrolase (reducing end) | Streptomyces bingchengensis BCW-1                   |  | AEX92722.1 | (85)  |

|      |                   |      |           |                                      |                                     |  |            |       |
|------|-------------------|------|-----------|--------------------------------------|-------------------------------------|--|------------|-------|
| GH48 | Orpinomyces_16688 | Dock | Cellulose | exo-cellobiohydrolase (reducing end) | No hits found                       |  | AEX92722.1 | (85)  |
| GH48 | Orpinomyces_16737 | Dock | Cellulose | exo-cellobiohydrolase (reducing end) | Streptomyces griseoaurantiacus M045 |  | AAN76734.1 | (102) |
| GH48 | Orpinomyces_16738 | Dock | Cellulose | exo-cellobiohydrolase (reducing end) | Streptomyces griseoaurantiacus M045 |  | AAN76734.1 | (102) |
| GH48 | Orpinomyces_16739 | Dock | Cellulose | exo-cellobiohydrolase (reducing end) | Streptomyces griseoaurantiacus M045 |  | AEX92722.1 | (85)  |
| GH48 | Orpinomyces_16756 | Dock | Cellulose | exo-cellobiohydrolase (reducing end) | Catenulispora acidiphila DSM 44928  |  | AEX92722.1 | (85)  |
| GH48 | Orpinomyces_16770 | Dock | Cellulose | exo-cellobiohydrolase (reducing end) | Catenulispora acidiphila DSM 44928  |  | AAN76734.1 | (102) |
| GH48 | Orpinomyces_16779 | Dock | Cellulose | exo-cellobiohydrolase (reducing end) | Catenulispora acidiphila DSM 44928  |  | AEX92722.1 | (85)  |

|      |                   |      |           |                                                  |                                          |  |            |       |
|------|-------------------|------|-----------|--------------------------------------------------|------------------------------------------|--|------------|-------|
| GH48 | Orpinomyces_16795 | Dock | Cellulose | exo-cellobiohydrolase (reducing end)             | Streptomyces griseoaurantiacus M045      |  | AEX92722.1 | (85)  |
| GH48 | Orpinomyces_4269  | Dock | Cellulose | exo-cellobiohydrolase (reducing end)             | Streptomyces griseoaurantiacus M045      |  | AAN76734.1 | (102) |
| GH48 | Orpinomyces_7252  | Dock | Cellulose | exo-cellobiohydrolase (reducing end)             | Streptosporangium roseum DSM 43021       |  | AAN76735.1 | (102) |
| GH48 | Orpinomyces_7411  | Dock | Cellulose | exo-cellobiohydrolase (reducing end)             | Ktedonobacter racemifer DSM 44963        |  | AEX92722.1 | (85)  |
| GH48 | Orpinomyces_8349  | Dock | Cellulose | exo-cellobiohydrolase (reducing end)             | Streptomyces avermitilis MA-4680         |  | AEX92722.1 | (85)  |
| GH48 | Orpinomyces_9842  |      | Cellulose | exo-cellobiohydrolase (reducing end)             | Streptomyces griseoaurantiacus M045      |  | AEX92722.1 | (85)  |
| GH53 | Orpinomyces_16670 | Dock | Pectin    | arabinogalactan endo-1,4- $\beta$ -galactosidase | Ruminococcus albus 8                     |  |            |       |
| GH53 | Orpinomyces_36    |      | Pectin    | arabinogalactan endo-1,4- $\beta$ -galactosidase | Candidatus Solibacter usitatus Ellin6076 |  |            |       |

|                      |                   |                                                  |                                                 |                                                  |                                      |  |  |  |
|----------------------|-------------------|--------------------------------------------------|-------------------------------------------------|--------------------------------------------------|--------------------------------------|--|--|--|
| GH57                 | Orpinomyces_16437 | Polysaccharide deacetylase, Chitin_bind_1 domain | Starch                                          | $\alpha$ -glucosidase                            | Batrachochytrium dendrobatidis JAM81 |  |  |  |
| GH57                 | Orpinomyces_16484 | Polysaccharide deacetylase, DUF963               | Starch                                          | $\alpha$ -glucosidase                            | Rhizopus oryzae RA 99-880            |  |  |  |
| GH57                 | Orpinomyces_3441  | Polysaccharide deacetylase                       | Starch                                          | $\alpha$ -glucosidase                            | Rhizopus oryzae RA 99-880            |  |  |  |
| GH67                 | Orpinomyces_16601 |                                                  | Hemicellulose                                   | $\alpha$ -glucuronidase                          | Paludibacter propionicigenes WB4     |  |  |  |
| GH67                 | Orpinomyces_16632 |                                                  | Hemicellulose                                   | $\alpha$ -glucuronidase                          | Paludibacter propionicigenes WB4     |  |  |  |
| GH88                 | Orpinomyces_16433 |                                                  | Pectin PL produced unsaturated oligosaccharides | unsaturated glucuronyl hydrolase (glucuronidase) | Ruminococcus albus 8                 |  |  |  |
|                      |                   |                                                  |                                                 |                                                  |                                      |  |  |  |
| <b>Pectate Lyase</b> |                   |                                                  |                                                 |                                                  |                                      |  |  |  |
| PL1                  | Orpinomyces_16403 | CBM1                                             | Pectin                                          | Pectate lyase                                    | Streptomyces sp. SirexAA-E           |  |  |  |
| PL1                  | Orpinomyces_16404 | CBM1                                             | Pectin                                          | Pectate lyase                                    | Streptomyces sp. SirexAA-E           |  |  |  |

|     |                   |                                       |        |               |                                    |  |  |  |
|-----|-------------------|---------------------------------------|--------|---------------|------------------------------------|--|--|--|
| PL1 | Orpinomyces_16405 | CBM1                                  | Pectin | Pectate lyase | Neosartorya fischeri NRRL 181      |  |  |  |
| PL1 | Orpinomyces_16408 | CBM1                                  | Pectin | Pectate lyase | Streptomyces sp. SirexAA-E         |  |  |  |
| PL1 | Orpinomyces_16410 | CBM1                                  | Pectin | Pectate lyase | Streptomyces sp. SirexAA-E         |  |  |  |
| PL1 | Orpinomyces_16400 |                                       | Pectin | Pectate lyase | Streptomyces bingchenggensis BCW-1 |  |  |  |
| PL1 | Orpinomyces_16402 |                                       | Pectin | Pectate lyase | Streptomyces bingchenggensis BCW-1 |  |  |  |
| PL1 | Orpinomyces_143   |                                       | Pectin | Unknown       | No hits found                      |  |  |  |
| PL1 | Orpinomyces_2377  | CBM1                                  | Pectin | Pectate lyase | Streptomyces sp. SirexAA-E         |  |  |  |
| PL1 | Orpinomyces_10052 | CBM1                                  | Pectin | Pectate lyase | Streptomyces sp. SirexAA-E         |  |  |  |
| PL1 | Orpinomyces_10317 |                                       | Pectin | Pectate lyase | Streptomyces bingchenggensis BCW-1 |  |  |  |
| PL1 | Orpinomyces_11041 |                                       | Pectin | Pectate lyase | Streptomyces bingchenggensis BCW-1 |  |  |  |
| PL1 | Orpinomyces_11295 |                                       | Pectin | Pectate lyase | Streptomyces bingchenggensis BCW-1 |  |  |  |
| PL1 | Orpinomyces_15112 | Ricin-type beta-trefoil lectin domain | Pectin | Pectate lyase | Ruminococcus champanellensis 18P13 |  |  |  |



|                          |                   |                                                  |        |                   |                                     |  |            |       |
|--------------------------|-------------------|--------------------------------------------------|--------|-------------------|-------------------------------------|--|------------|-------|
| PL1                      | Orpinomyces_16255 | Ankyrin repeats<br>(3 copies)<br>/Ankyrin repeat | Pectin | Pectate lyase     | No hits found                       |  |            |       |
| PL1                      | Orpinomyces_14551 | CBM1, LIM-<br>domain binding<br>protein          | Pectin | Pectate lyase     | Streptomyces sp.<br>SirexAA-E       |  |            |       |
| PL1                      | Orpinomyces_14597 | CBM1                                             | Pectin | Pectate lyase     | Streptomyces sp.<br>SirexAA-E       |  |            |       |
| PL1                      | Orpinomyces_16407 | CBM1                                             | Pectin | Pectate lyase     | Neosartorya<br>fischeri NRRL<br>181 |  |            |       |
| PL1                      | Orpinomyces_16399 |                                                  | Pectin | Pectate lyase     | Neosartorya<br>fischeri NRRL<br>181 |  |            |       |
| PL1                      | Orpinomyces_10086 | CBM1                                             | Pectin | Pectate lyase     | Aspergillus terreus<br>NIH2624      |  |            |       |
| PL1                      | Orpinomyces_13937 | CBM1                                             | Pectin | Pectate lyase     | Aspergillus terreus<br>NIH2624      |  |            |       |
| PL3                      | Orpinomyces_1373  |                                                  | Pectin | Pectate lyase     | Aspergillus<br>nidulans             |  |            |       |
| PL3                      | Orpinomyces_8883  |                                                  | Pectin | Pectate lyase     | Aspergillus<br>nidulans FGSC<br>A4  |  |            |       |
| PL3                      | Orpinomyces_12197 |                                                  | Pectin | pectate lyase     | Glomerella<br>graminicola<br>M1.001 |  |            |       |
|                          |                   |                                                  |        |                   |                                     |  |            |       |
| <b>Carboxylesterases</b> |                   |                                                  |        |                   |                                     |  |            |       |
| CE1                      | Orpinomyces_14286 | Abhydrolase_5,<br>CBM_10,<br>Esterase            | N/A    | feruloyl esterase | Cellulosilyticum<br>ruminicola      |  | ADZ47894.1 | (103) |

|     |                   |                                                                                                        |     |                                      |                                                                 |  |            |       |
|-----|-------------------|--------------------------------------------------------------------------------------------------------|-----|--------------------------------------|-----------------------------------------------------------------|--|------------|-------|
| CE1 | Orpinomyces_14389 | Abhydrolase_5,<br>CBM_10,<br>Esterase                                                                  | N/A | feruloyl esterase                    | Cellulosilyticum<br>ruminicola                                  |  | ADZ47894.1 | (103) |
| CE1 | Orpinomyces_14566 | Abhydrolase_5,<br>CBM_10,<br>Esterase                                                                  | N/A | feruloyl esterase                    | Cellulosilyticum<br>ruminicola                                  |  | ADZ47894.1 | (103) |
| CE1 | Orpinomyces_14680 | Abhydrolase_5,<br>CBM_10,<br>Esterase                                                                  | N/A | feruloyl esterase                    | Cellulosilyticum<br>ruminicola                                  |  | ADZ47894.1 | (103) |
| CE1 | Orpinomyces_7232  | CBM_10,<br>Esterase                                                                                    | N/A | feruloyl esterase                    | Cellulosilyticum<br>ruminicola                                  |  | ADZ47894.1 | (103) |
| CE1 | Orpinomyces_10331 | Peptidase_S9                                                                                           | N/A | Lipase                               | Streptococcus<br>gallolyticus subsp.<br>gallolyticus<br>TX20005 |  |            |       |
| CE1 | Orpinomyces_11170 | Abhydrolase_3                                                                                          | N/A | Conserved<br>hypothetical<br>protein | Batrachochytrium<br>dendrobatidis<br>JAM81                      |  |            |       |
| CE1 | Orpinomyces_11371 | Abhydrolase_3,<br>Abhydrolase_5,<br>AXE1,<br>BAAT_C, DLH,<br>DUF2811,<br>Esterase_phd,<br>Peptidase_S9 | N/A | Lipase                               | Clostridium<br>ramosum DSM<br>1402                              |  |            |       |
| CE1 | Orpinomyces_11412 | Abhydrolase_3                                                                                          | N/A | Carboxyl<br>esterase                 | Clostridium<br>acetobutylicum<br>ATCC 824                       |  |            |       |
| CE1 | Orpinomyces_11974 | Peptidase_S9                                                                                           | N/A | Lipase                               | Streptococcus<br>gallolyticus subsp.<br>gallolyticus<br>TX20005 |  |            |       |

|     |                   |                                                                                   |     |                                      |                                            |  |  |
|-----|-------------------|-----------------------------------------------------------------------------------|-----|--------------------------------------|--------------------------------------------|--|--|
| CE1 | Orpinomyces_11995 | Abhydrolase_3,<br>Abhydrolase_5,<br>DUF2305                                       | N/A | Conserved<br>hypothetical<br>protein | Batrachochytrium<br>dendrobatidis<br>JAM81 |  |  |
| CE1 | Orpinomyces_11996 | Abhydrolase_3,<br>Abhydrolase_5,<br>DUF2305                                       | N/A | Conserved<br>hypothetical<br>protein | Batrachochytrium<br>dendrobatidis<br>JAM81 |  |  |
| CE1 | Orpinomyces_12320 | Abhydrolase_3,<br>Abhydrolase_5,<br>Abhydrolase_6,<br>Chlorophyllase2<br>, DUF676 | N/A | Conserved<br>hypothetical<br>protein | Batrachochytrium<br>dendrobatidis<br>JAM81 |  |  |
| CE1 | Orpinomyces_1299  | Abhydrolase_3,<br>Abhydrolase_5,<br>Peptidase_S9                                  | N/A | Conserved<br>hypothetical<br>protein | Batrachochytrium<br>dendrobatidis<br>JAM81 |  |  |
| CE1 | Orpinomyces_13681 | Abhydrolase_3,<br>Abhydrolase_5                                                   | N/A | Conserved<br>hypothetical<br>protein | Batrachochytrium<br>dendrobatidis<br>JAM81 |  |  |
| CE1 | Orpinomyces_13737 | Abhydrolase_3,<br>Abhydrolase_5                                                   | N/A | Conserved<br>hypothetical<br>protein | Batrachochytrium<br>dendrobatidis<br>JAM81 |  |  |
| CE1 | Orpinomyces_13813 | Abhydrolase_3,<br>Abhydrolase_5                                                   | N/A | Conserved<br>hypothetical<br>protein | Batrachochytrium<br>dendrobatidis<br>JAM81 |  |  |
| CE1 | Orpinomyces_13818 | Abhydrolase_3,<br>Abhydrolase_5                                                   | N/A | Conserved<br>hypothetical<br>protein | Batrachochytrium<br>dendrobatidis<br>JAM81 |  |  |
| CE1 | Orpinomyces_13845 | Abhydrolase_3,<br>Abhydrolase_5                                                   | N/A | Conserved<br>hypothetical<br>protein | Batrachochytrium<br>dendrobatidis<br>JAM81 |  |  |
| CE1 | Orpinomyces_13848 | Abhydrolase_3,<br>Abhydrolase_5,<br>Chlorophyllase                                | N/A | Conserved<br>hypothetical<br>protein | Batrachochytrium<br>dendrobatidis<br>JAM81 |  |  |

|     |                   |                                                                           |     |                                |                                                              |  |  |
|-----|-------------------|---------------------------------------------------------------------------|-----|--------------------------------|--------------------------------------------------------------|--|--|
| CE1 | Orpinomyces_13941 | Abhydrolase_3                                                             | N/A | Conserved hypothetical protein | Batrachochytrium dendrobatidis JAM81                         |  |  |
| CE1 | Orpinomyces_14107 | Peptidase_S9                                                              | N/A | Lipase                         | Streptococcus gallolyticus subsp. gallolyticus ATCC BAA-2069 |  |  |
| CE1 | Orpinomyces_15536 | Abhydrolase_5, Peptidase_S9                                               | N/A | Lipase                         | Clostridium ramosum DSM 1402                                 |  |  |
| CE1 | Orpinomyces_16208 | Abhydrolase_3, Abhydrolase_5, BAAT_C, DUF2811, Esterase_phd, Peptidase_S9 | N/A | Lipase                         | Clostridium ramosum DSM 1402                                 |  |  |
| CE1 | Orpinomyces_16350 | Abhydrolase_3, Abhydrolase_5, Peptidase_S9                                | N/A | Conserved hypothetical protein | Batrachochytrium dendrobatidis JAM81                         |  |  |
| CE1 | Orpinomyces_16351 | Abhydrolase_3, Abhydrolase_5, Peptidase_S9                                | N/A | Conserved hypothetical protein | Batrachochytrium dendrobatidis JAM81                         |  |  |
| CE1 | Orpinomyces_16352 | Abhydrolase_3, Peptidase_S9                                               | N/A | Carboxyl esterase              | Clostridium acetobutylicum ATCC 824                          |  |  |
| CE1 | Orpinomyces_16354 | Abhydrolase_3, Abhydrolase_5, Chlorophyllase2                             | N/A | Conserved hypothetical protein | Batrachochytrium dendrobatidis JAM81                         |  |  |
| CE1 | Orpinomyces_16355 | Abhydrolase_3, Peptidase_S9                                               | N/A | Carboxyl esterase              | Clostridium acetobutylicum ATCC 824                          |  |  |

|     |                   |                                                                                                                                              |     |                                      |                                                                 |  |  |  |
|-----|-------------------|----------------------------------------------------------------------------------------------------------------------------------------------|-----|--------------------------------------|-----------------------------------------------------------------|--|--|--|
| CE1 | Orpinomyces_16356 | AAA_10,<br>ABC_membrane<br>, ABC_tran,<br>DUF258,<br>FtsK_SpoIIIE,<br>GSPII_E,<br>Macoilin, Miro,<br>SMC_N,<br>TrwB_AAD_bin<br>d, Zeta_toxin | N/A | Conserved<br>hypothetical<br>protein | Batrachochytrium<br>dendrobatidis<br>JAM81                      |  |  |  |
| CE1 | Orpinomyces_16357 | Abhydrolase_3,<br>Abhydrolase_5                                                                                                              | N/A | Conserved<br>hypothetical<br>protein | Batrachochytrium<br>dendrobatidis<br>JAM81                      |  |  |  |
| CE1 | Orpinomyces_16358 | Abhydrolase_3,<br>Peptidase_S9                                                                                                               | N/A | Carboxyl<br>esterase                 | Clostridium<br>acetobutylicum<br>ATCC 824                       |  |  |  |
| CE1 | Orpinomyces_16359 | Abhydrolase_5,<br>Esterase_phd,<br>Peptidase_S9                                                                                              | N/A | Lipase                               | Streptococcus<br>gallolyticus subsp.<br>gallolyticus<br>TX20005 |  |  |  |
| CE1 | Orpinomyces_16360 | Abhydrolase_3,<br>Abhydrolase_5,<br>DUF2305                                                                                                  | N/A | Conserved<br>hypothetical<br>protein | Batrachochytrium<br>dendrobatidis<br>JAM81                      |  |  |  |
| CE1 | Orpinomyces_16361 | Abhydrolase_3,<br>Abhydrolase_5,<br>Abhydrolase_6,<br>Lipase_3                                                                               | N/A | Conserved<br>hypothetical<br>protein | Batrachochytrium<br>dendrobatidis<br>JAM81                      |  |  |  |
| CE1 | Orpinomyces_16363 | Abhydrolase_3,<br>Abhydrolase_5,<br>Chlorophyllase,<br>Peptidase_S9                                                                          | N/A | Conserved<br>hypothetical<br>protein | Batrachochytrium<br>dendrobatidis<br>JAM81                      |  |  |  |

|     |                   |                                                                                   |     |                                      |                                            |  |  |  |
|-----|-------------------|-----------------------------------------------------------------------------------|-----|--------------------------------------|--------------------------------------------|--|--|--|
| CE1 | Orpinomyces_16364 | Abhydrolase_3,<br>Abhydrolase_5                                                   | N/A | Conserved<br>hypothetical<br>protein | Batrachochytrium<br>dendrobatidis<br>JAM81 |  |  |  |
| CE1 | Orpinomyces_16365 | Abhydrolase_3,<br>Abhydrolase_5,<br>Peptidase_S9                                  | N/A | Conserved<br>hypothetical<br>protein | Batrachochytrium<br>dendrobatidis<br>JAM81 |  |  |  |
| CE1 | Orpinomyces_16366 | Abhydrolase_3,<br>Abhydrolase_5                                                   | N/A | Conserved<br>hypothetical<br>protein | Batrachochytrium<br>dendrobatidis<br>JAM81 |  |  |  |
| CE1 | Orpinomyces_16367 | Abhydrolase_3                                                                     | N/A | Conserved<br>hypothetical<br>protein | Batrachochytrium<br>dendrobatidis<br>JAM81 |  |  |  |
| CE1 | Orpinomyces_16370 | Abhydrolase_3,<br>Abhydrolase_5,<br>Peptidase_S9                                  | N/A | Conserved<br>hypothetical<br>protein | Batrachochytrium<br>dendrobatidis<br>JAM81 |  |  |  |
| CE1 | Orpinomyces_16372 | Abhydrolase_3,<br>Abhydrolase_5,<br>Abhydrolase_6                                 | N/A | Conserved<br>hypothetical<br>protein | Batrachochytrium<br>dendrobatidis<br>JAM81 |  |  |  |
| CE1 | Orpinomyces_16375 |                                                                                   | N/A | Conserved<br>hypothetical<br>protein | Batrachochytrium<br>dendrobatidis<br>JAM81 |  |  |  |
| CE1 | Orpinomyces_16377 | Abhydrolase_3,<br>Abhydrolase_5,<br>Chlorophyllase                                | N/A | Conserved<br>hypothetical<br>protein | Batrachochytrium<br>dendrobatidis<br>JAM81 |  |  |  |
| CE1 | Orpinomyces_16379 | Abhydrolase_3,<br>Abhydrolase_5,<br>Chlorophyllase2<br>, DUF2305,<br>Peptidase_S9 | N/A | Conserved<br>hypothetical<br>protein | Batrachochytrium<br>dendrobatidis<br>JAM81 |  |  |  |
| CE1 | Orpinomyces_16383 | Abhydrolase_3,<br>Abhydrolase_5,<br>Abhydrolase_6,<br>Chlorophyllase2             | N/A | Conserved<br>hypothetical<br>protein | Batrachochytrium<br>dendrobatidis<br>JAM81 |  |  |  |

|     |                   |                                                                                                                                                                     |     |                                      |                                            |  |  |  |
|-----|-------------------|---------------------------------------------------------------------------------------------------------------------------------------------------------------------|-----|--------------------------------------|--------------------------------------------|--|--|--|
| CE1 | Orpinomyces_16384 | Abhydrolase_3,<br>Abhydrolase_5,<br>Peptidase_S9,<br>Abhydrolase_3,<br>Abhydrolase_5,<br>Chlorophyllase,<br>Chlorophyllase2<br>,<br>Abhydrolase_3,<br>Abhydrolase_5 | N/A | Conserved<br>hypothetical<br>protein | Batrachochytrium<br>dendrobatidis<br>JAM81 |  |  |  |
| CE1 | Orpinomyces_16385 | Abhydrolase_3,<br>Abhydrolase_5,<br>Abhydrolase_6,<br>Chlorophyllase2<br>, Lipase_3                                                                                 | N/A | Conserved<br>hypothetical<br>protein | Batrachochytrium<br>dendrobatidis<br>JAM81 |  |  |  |
| CE1 | Orpinomyces_16386 | Abhydrolase_3,<br>Peptidase_S9                                                                                                                                      | N/A | Carboxyl<br>esterase                 | Clostridium<br>acetobutylicum<br>ATCC 824  |  |  |  |
| CE1 | Orpinomyces_16390 | Abhydrolase_3,<br>Abhydrolase_5                                                                                                                                     | N/A | Conserved<br>hypothetical<br>protein | Batrachochytrium<br>dendrobatidis<br>JAM81 |  |  |  |
| CE1 | Orpinomyces_16392 | Abhydrolase_3,<br>Abhydrolase_5                                                                                                                                     | N/A | Conserved<br>hypothetical<br>protein | No hits found                              |  |  |  |
| CE1 | Orpinomyces_16395 | Abhydrolase_3,<br>Abhydrolase_5,<br>Abhydrolase_6,<br>DLH                                                                                                           | N/A | Conserved<br>hypothetical<br>protein | No hits found                              |  |  |  |
| CE1 | Orpinomyces_1977  | Abhydrolase_3,<br>Abhydrolase_5,<br>Chlorophyllase2<br>, LRR_1,<br>LRR_4,                                                                                           | N/A | Conserved<br>hypothetical<br>protein | Batrachochytrium<br>dendrobatidis<br>JAM81 |  |  |  |

|     |                  |                                                                                     |     |                                      |                                                                       |  |  |
|-----|------------------|-------------------------------------------------------------------------------------|-----|--------------------------------------|-----------------------------------------------------------------------|--|--|
|     |                  | Peptidase_S9                                                                        |     |                                      |                                                                       |  |  |
| CE1 | Orpinomyces_3901 | Abhydrolase_3,<br>Abhydrolase_5,<br>DUF2305,<br>Peptidase_S9                        | N/A | Conserved<br>hypothetical<br>protein | Batrachochytrium<br>dendrobatidis<br>JAM81                            |  |  |
| CE1 | Orpinomyces_4580 | Abhydrolase_3,<br>Abhydrolase_5,<br>Esterase_phd,<br>Peptidase_S9                   | N/A | Lipase                               | Mollicutes<br>bacterium D7                                            |  |  |
| CE1 | Orpinomyces_4687 | Abhydrolase_5,<br>Peptidase_S9                                                      | N/A | Lipase                               | Streptococcus<br>gallolyticus subsp.<br>gallolyticus<br>TX20005       |  |  |
| CE1 | Orpinomyces_4704 | Abhydrolase_3,<br>Abhydrolase_5,<br>Chitin_bind_1,<br>Esterase_phd,<br>Peptidase_S9 | N/A | Lipase                               | Clostridium<br>ramosum DSM<br>1402                                    |  |  |
| CE1 | Orpinomyces_8320 | Abhydrolase_5,<br>Esterase_phd,<br>Peptidase_S9                                     | N/A | Lipase                               | Streptococcus<br>gallolyticus subsp.<br>gallolyticus ATCC<br>BAA-2069 |  |  |
| CE1 | Orpinomyces_8977 | Abhydrolase_5,<br>Peptidase_S9                                                      | N/A | Lipase                               | Streptococcus<br>gallolyticus subsp.<br>gallolyticus<br>TX20005       |  |  |
| CE1 | Orpinomyces_9040 | Abhydrolase_3,<br>Abhydrolase_5,<br>Peptidase_S9                                    | N/A | Conserved<br>hypothetical<br>protein | Batrachochytrium<br>dendrobatidis<br>JAM81                            |  |  |



|      |                   |                                                                                                            |     |                                                              |                                           |  |  |  |
|------|-------------------|------------------------------------------------------------------------------------------------------------|-----|--------------------------------------------------------------|-------------------------------------------|--|--|--|
| CE1  | Orpinomyces_9108  | Abhydrolase_3,<br>Abhydrolase_5,<br>Chitin_bind_1,<br>Esterase_phd,<br>Peptidase_S9,<br>rRNA_methylas<br>e | N/A | Lipase                                                       | Clostridium<br>ramosum DSM<br>1402        |  |  |  |
| CE10 | Orpinomyces_13595 | Abhydrolase_3,<br>Abhydrolase_5,<br>Abhydrolase_6                                                          | N/A | Esterase                                                     | No hits found                             |  |  |  |
| CE10 | Orpinomyces_13726 | Abhydrolase_3,<br>Abhydrolase_5,<br>Abhydrolase_6,<br>Chlorophyllase2<br>, Lipase_3                        | N/A | Conserved<br>hypothetical<br>protein                         | Thalassiosira<br>oceanica                 |  |  |  |
| CE10 | Orpinomyces_13752 | Abhydrolase_5,<br>Abhydrolase_6,<br>Peptidase_S9                                                           | N/A | Conserved<br>hypothetical<br>protein                         | Physcomitrella<br>patens subsp.<br>Patens |  |  |  |
| CE10 | Orpinomyces_13911 | Abhydrolase_3,<br>Abhydrolase_5,<br>Abhydrolase_6                                                          | N/A | Lipase                                                       | No hits found                             |  |  |  |
| CE10 | Orpinomyces_14371 | Abhydrolase_3,<br>Chlorophyllase2                                                                          | N/A | Carboxyl<br>esterase                                         | Gordonia terrae<br>NBRC 100016            |  |  |  |
| CE10 | Orpinomyces_16348 | Abhydrolase_3,<br>Abhydrolase_5                                                                            | N/A | alpha, beta<br>hydrolase<br>domain-<br>containing<br>protein | Citromicrobium<br>bathyomarinum<br>JL354  |  |  |  |
| CE10 | Orpinomyces_16353 | Abhydrolase_3                                                                                              | N/A | ester hydrolase                                              | uncultured<br>prokaryote                  |  |  |  |
| CE10 | Orpinomyces_16373 | Abhydrolase_3,<br>Abhydrolase_5                                                                            | N/A | conserved<br>hypothetical<br>protein                         | Perkinsus marinus<br>ATCC 50983           |  |  |  |

|      |                   |                                                                               |     |                                                              |                                           |  |  |  |
|------|-------------------|-------------------------------------------------------------------------------|-----|--------------------------------------------------------------|-------------------------------------------|--|--|--|
| CE10 | Orpinomyces_16374 | Abhydrolase_3,<br>Abhydrolase_5,<br>Chlorophyllase2<br>, Peptidase_S9         | N/A | Conserved<br>hypothetical<br>protein                         | No hits found                             |  |  |  |
| CE10 | Orpinomyces_16378 | Abhydrolase_3,<br>Abhydrolase_5                                               | N/A | alpha, beta<br>hydrolase<br>domain-<br>containing<br>protein | No hits found                             |  |  |  |
| CE10 | Orpinomyces_16380 | Abhydrolase_3,<br>Abhydrolase_5,<br>Abhydrolase_6,<br>DUF915,<br>Peptidase_S9 | N/A | Conserved<br>hypothetical<br>protein                         | Physcomitrella<br>patens subsp.<br>Patens |  |  |  |
| CE10 | Orpinomyces_16388 | Abhydrolase_3,<br>Abhydrolase_5,<br>Abhydrolase_6                             | N/A | Lipase                                                       | No hits found                             |  |  |  |
| CE10 | Orpinomyces_16393 | Abhydrolase_3,<br>Abhydrolase_5,<br>Abhydrolase_6,<br>Lipase_3                | N/A | Lipase                                                       | No hits found                             |  |  |  |
| CE10 | Orpinomyces_16396 | Abhydrolase_3,<br>Abhydrolase_5,<br>Chlorophyllase,<br>Chlorophyllase2        | N/A | unnamed protein<br>product                                   | Tetraodon<br>nigroviridis                 |  |  |  |
| CE10 | Orpinomyces_2309  | Abhydrolase_3,<br>Abhydrolase_5,<br>DUF2305                                   | N/A | Conserved<br>hypothetical<br>protein                         | Dictyostelium<br>fasciculatum             |  |  |  |
| CE10 | Orpinomyces_4056  | Abhydrolase_5,<br>Abhydrolase_6,<br>Hydrolase_4,<br>Peptidase_S9              | N/A | Conserved<br>hypothetical<br>protein                         | Physcomitrella<br>patens subsp.<br>Patens |  |  |  |

|       |                   |                                                                                                                        |     |                                      |                                                        |  |            |       |
|-------|-------------------|------------------------------------------------------------------------------------------------------------------------|-----|--------------------------------------|--------------------------------------------------------|--|------------|-------|
| CE10  | Orpinomyces_8981  | Abhydrolase_3,<br>Abhydrolase_5,<br>Abhydrolase_6,<br>Chlorophyllase2<br>, Lipase_3                                    | N/A | Conserved<br>hypothetical<br>protein | Thalassiosira<br>oceanica                              |  |            |       |
| CE_UC | Orpinomyces_4874  | Ank, Ank_2                                                                                                             | N/A | Conserved<br>hypothetical<br>protein | Salpingoeca sp.<br>ATCC 50818                          |  | ADZ47894.1 | (103) |
| CE_UC | Orpinomyces_102   |                                                                                                                        | N/A | Unknown                              |                                                        |  |            |       |
| CE_UC | Orpinomyces_11068 | Abhydrolase_5,<br>Abhydrolase_6,<br>Peptidase_S9                                                                       | N/A | Conserved<br>hypothetical<br>protein | Rhizopus oryzae<br>RA 99-880                           |  |            |       |
| CE_UC | Orpinomyces_14170 | Abhydrolase_3,<br>Abhydrolase_5                                                                                        | N/A | Conserved<br>hypothetical<br>protein | Puccinia graminis<br>f. sp. tritici CRL<br>75-36-700-3 |  |            |       |
| CE_UC | Orpinomyces_16349 |                                                                                                                        | N/A | Unknown                              |                                                        |  |            |       |
| CE_UC | Orpinomyces_16368 |                                                                                                                        | N/A | Conserved<br>hypothetical<br>protein | No hits found                                          |  |            |       |
| CE_UC | Orpinomyces_16369 | Ank, Ank_2,<br>SH3_1, SH3_2                                                                                            | N/A | Conserved<br>hypothetical<br>protein | Candidatus<br>Amoebophilus<br>asiaticus 5a2            |  |            |       |
| CE_UC | Orpinomyces_16381 | Abhydrolase_3,<br>Abhydrolase_5,<br>Abhydrolase_6,<br>Chlorophyllase2<br>, DUF2305,<br>Abhydrolase_3,<br>Abhydrolase_5 | N/A | Conserved<br>hypothetical<br>protein | Phytophthora<br>sojae                                  |  |            |       |
| CE_UC | Orpinomyces_16389 | Abhydrolase_3,<br>Abhydrolase_5,<br>Abhydrolase_6                                                                      | N/A | Lipase                               | No hits found                                          |  |            |       |

|       |                   |                                                                                                 |     |                                                     |                                             |  |  |  |
|-------|-------------------|-------------------------------------------------------------------------------------------------|-----|-----------------------------------------------------|---------------------------------------------|--|--|--|
| CE_UC | Orpinomyces_16391 | Abhydrolase_3,<br>Fibrinogen_BP,<br>Peptidase_S9                                                | N/A | Rab family<br>GTPase                                | Entamoeba<br>histolytica HM-<br>1:IMSS      |  |  |  |
| CE_UC | Orpinomyces_16394 | Abhydrolase_3,<br>Abhydrolase_5,<br>Abhydrolase_6,<br>Chlorophyllase2<br>, Peptidase_S9         | N/A | esterase, lipase,<br>thioesterase<br>family protein | No hits found                               |  |  |  |
| CE_UC | Orpinomyces_16397 | Abhydrolase_5,<br>DUF249,<br>Peptidase_S9,<br>Abhydrolase_3,<br>Abhydrolase_5,<br>Abhydrolase_6 | N/A | Lipase                                              | Streptococcus<br>gallolyticus<br>UCN34      |  |  |  |
| CE_UC | Orpinomyces_2306  |                                                                                                 | N/A | mitochondrial<br>endopeptidase                      | Serpula lacrymans<br>var. lacrymans<br>S7.9 |  |  |  |
| CE_UC | Orpinomyces_810   | BP28CT,<br>Esterase, HEAT,<br>U3snoRNP10                                                        | N/A | Conserved<br>hypothetical<br>protein                | Rhizopus oryzae<br>RA 99-880                |  |  |  |

1

2

Table S19. Comparison of CAZyme numbers in C1A and various fungal genomes

| <b>Phylum</b>                    | <b>Species Name</b>               | <b>GH</b>  | <b>CE</b> | <b>PL</b> |
|----------------------------------|-----------------------------------|------------|-----------|-----------|
| <b>Neocallimastigomycota</b>     | <i>Orpinomyces</i> sp. strain C1A | <b>358</b> | <b>92</b> | <b>24</b> |
|                                  |                                   |            |           |           |
| <b>Ascomycetes</b>               | <b>Eurotiomycetes</b>             |            |           |           |
|                                  | <i>Aspergillus nidulans</i>       | 259        | 33        | 22        |
|                                  | <i>Aspergillus niger</i>          | 254        | 26        | 8         |
|                                  | <i>Aspergillus Oryzae</i>         | 306        | 30        | 23        |
|                                  | <i>Penicillium chrysogenum</i>    | 223        | 22        | 9         |
|                                  |                                   |            |           |           |
|                                  | <b>Sordariomycetes</b>            |            |           |           |
|                                  | <i>Magnaporthe grisea</i>         | 240        | 47        | 5         |
|                                  | <i>Myceliophthora thermophile</i> | 215        | 29        | 8         |
|                                  | <i>Thielavia terrestris</i>       | 224        | 27        | 4         |
|                                  | <i>Podospora anserine</i>         | 236        | 41        | 7         |
|                                  | <i>Neurospora crassa</i>          | 197        | 22        | 4         |
|                                  | <i>Nectria haematococca</i>       | 329        | 44        | 33        |
|                                  | <i>Trichoderma reesei</i>         | 200        | 22        | 5         |
|                                  |                                   |            |           |           |
|                                  | <b>Saccharomycetes</b>            |            |           |           |
|                                  | <i>Saccharomyces cerevisiae</i>   | 57         | 3         | 5         |
|                                  |                                   |            |           |           |
| <b>Schizosaccharomycetes</b>     |                                   |            |           |           |
| <i>Schizosaccharomyces pombe</i> | 54                                | 5          | 0         |           |
| <i>Cryptococcus neoformans</i>   | 83                                | 7          | 3         |           |
|                                  |                                   |            |           |           |
| <b>Basidiomycetes</b>            | <b>Agaricomycetes</b>             |            |           |           |

|                           |                                             |     |    |    |
|---------------------------|---------------------------------------------|-----|----|----|
|                           | <i>Laccaria bicolor</i>                     | 163 | 17 | 7  |
|                           | <i>Postia placenta</i>                      | 144 | 10 | 6  |
|                           |                                             |     |    |    |
|                           | <b>Ustilaginomycetes</b>                    |     |    |    |
|                           | <i>Ustilago maydis</i>                      | 102 | 1  | 18 |
|                           |                                             |     |    |    |
| <b>Mucoromycotina</b>     | <i>Mucor circinelloides</i>                 | 97  |    |    |
|                           | <i>Rhizopus orizae</i>                      | 116 | 41 | 6  |
|                           |                                             |     |    |    |
| <b>Blastocladiomycota</b> | <i>Allomyces macrogynus</i>                 | 95  | 19 | 4  |
|                           |                                             |     |    |    |
| <b>Chytridiomycota</b>    | <i>Batrachochytrium dendrobatidis</i> JAM81 | 36  | 4  | 1  |
|                           | <i>Spizellomyces punctatus</i>              | 54  | 14 | 1  |
|                           |                                             |     |    |    |
| <b>Oomycetes</b>          | <i>Phytophthora infestans</i>               | 278 | 27 | 47 |
|                           | <i>Phytophthora ramorum</i>                 | 257 | 22 | 49 |
|                           | <i>Phytophthora sojae</i>                   | 301 | 37 | 54 |
|                           |                                             |     |    |    |

1

2

Table S20. Substrate degradtaion capabilities of strain C1A.

| Substrate | Activity      | CAZY affiliation | No. of genes | Gene ID                                                                                                                                                                                                                                                                                                                                                                                                                                                                                                                                                                                                                                      |
|-----------|---------------|------------------|--------------|----------------------------------------------------------------------------------------------------------------------------------------------------------------------------------------------------------------------------------------------------------------------------------------------------------------------------------------------------------------------------------------------------------------------------------------------------------------------------------------------------------------------------------------------------------------------------------------------------------------------------------------------|
| Cellulose | Endoglucanase | GH45             | 16           | Orpinomyces_7825, Orpinomyces_16773, Orpinomyces_16658, Orpinomyces_524, Orpinomyces_2252, Orpinomyces_16477, Orpinomyces_16718, Orpinomyces_16533, Orpinomyces_6562, Orpinomyces_7870, Orpinomyces_16613, Orpinomyces_16488, Orpinomyces_1749, Orpinomyces_4393, Orpinomyces_16521, Orpinomyces_5778.                                                                                                                                                                                                                                                                                                                                       |
|           |               | GH5              | 34           | Orpinomyces_8446, Orpinomyces_16691, Orpinomyces_2605, Orpinomyces_16787, Orpinomyces_16700, Orpinomyces_2543, Orpinomyces_16514, Orpinomyces_9720, Orpinomyces_2345, Orpinomyces_7414, Orpinomyces_5811, Orpinomyces_1444, Orpinomyces_1071, Orpinomyces_204, Orpinomyces_909, Orpinomyces_6541, Orpinomyces_11298, Orpinomyces_3867, Orpinomyces_14471, Orpinomyces_16434, Orpinomyces_16438, Orpinomyces_16455, Orpinomyces_16468, Orpinomyces_16486, Orpinomyces_16616, Orpinomyces_2510, Orpinomyces_2784, Orpinomyces_3851, Orpinomyces_12843, Orpinomyces_4162, Orpinomyces_16607, Orpinomyces_44, Orpinomyces_5086, Orpinomyces_5814 |
|           |               | GH8              | 2            | Orpinomyces_16605, Orpinomyces_14432                                                                                                                                                                                                                                                                                                                                                                                                                                                                                                                                                                                                         |
|           |               | GH9              | 12           | Orpinomyces_5169, Orpinomyces_16778, Orpinomyces_16732, Orpinomyces_16648, Orpinomyces_16721, Orpinomyces_3361, Orpinomyces_8987, Orpinomyces_9543, Orpinomyces_3567, Orpinomyces_16430, Orpinomyces_5746, Orpinomyces_6515                                                                                                                                                                                                                                                                                                                                                                                                                  |
|           |               |                  |              |                                                                                                                                                                                                                                                                                                                                                                                                                                                                                                                                                                                                                                              |

|                   |      |    |                                                                                                                                                                                                                                                                                                                                                                                                                                                                                                                                                                                                                                                                                                                                                                                                                        |
|-------------------|------|----|------------------------------------------------------------------------------------------------------------------------------------------------------------------------------------------------------------------------------------------------------------------------------------------------------------------------------------------------------------------------------------------------------------------------------------------------------------------------------------------------------------------------------------------------------------------------------------------------------------------------------------------------------------------------------------------------------------------------------------------------------------------------------------------------------------------------|
| Cellobiohydrolase | GH6  | 43 | Orpinomyces_16626, Orpinomyces_3813, Orpinomyces_16924, Orpinomyces_10295, Orpinomyces_2459, Orpinomyces_6132, Orpinomyces_5544, Orpinomyces_1464, Orpinomyces_7034, Orpinomyces_8266, Orpinomyces_8423, Orpinomyces_16639, Orpinomyces_16653, Orpinomyces_903, Orpinomyces_2901, Orpinomyces_16641, Orpinomyces_16656, Orpinomyces_3583, Orpinomyces_3857, Orpinomyces_4145, Orpinomyces_4642, Orpinomyces_4748, Orpinomyces_5216, Orpinomyces_6944, Orpinomyces_8084, Orpinomyces_11639, Orpinomyces_8802, Orpinomyces_3449, Orpinomyces_3530, Orpinomyces_16776, Orpinomyces_7615, Orpinomyces_16465, Orpinomyces_16543, Orpinomyces_16489, Orpinomyces_16562, Orpinomyces_16629, Orpinomyces_4503, Orpinomyces_3375, Orpinomyces_12853, Orpinomyces_16627, Orpinomyces_16419, Orpinomyces_16505, Orpinomyces_10614 |
|                   | GH48 | 21 | Orpinomyces_16647, Orpinomyces_16688, Orpinomyces_16756, Orpinomyces_16770, Orpinomyces_16779, Orpinomyces_16646, Orpinomyces_7411, Orpinomyces_8349, Orpinomyces_16682, Orpinomyces_10796, Orpinomyces_16737, Orpinomyces_16738, Orpinomyces_16739, Orpinomyces_16795, Orpinomyces_4269, Orpinomyces_16679, Orpinomyces_7252, Orpinomyces_9842, Orpinomyces_16424, Orpinomyces_1263, Orpinomyces_15099                                                                                                                                                                                                                                                                                                                                                                                                                |
|                   |      |    |                                                                                                                                                                                                                                                                                                                                                                                                                                                                                                                                                                                                                                                                                                                                                                                                                        |
| Beta glucosidase  | GH1  | 9  | Orpinomyces_16576, Orpinomyces_16492, Orpinomyces_3649, Orpinomyces_16550, Orpinomyces_1791, Orpinomyces_8060, Orpinomyces_14808, Orpinomyces_16414, Orpinomyces_1810                                                                                                                                                                                                                                                                                                                                                                                                                                                                                                                                                                                                                                                  |



|                                                    |              |      |    |                                                                                                                                                                                                                                                                                                                                                                                                                                                                                                                                                                                                                                                                                                                    |
|----------------------------------------------------|--------------|------|----|--------------------------------------------------------------------------------------------------------------------------------------------------------------------------------------------------------------------------------------------------------------------------------------------------------------------------------------------------------------------------------------------------------------------------------------------------------------------------------------------------------------------------------------------------------------------------------------------------------------------------------------------------------------------------------------------------------------------|
|                                                    |              | GH3  | 37 | Orpinomyces_2490, Orpinomyces_16608, Orpinomyces_16466, Orpinomyces_16619, Orpinomyces_16542, Orpinomyces_11443, Orpinomyces_14809, Orpinomyces_16462, Orpinomyces_16497, Orpinomyces_16522, Orpinomyces_16534, Orpinomyces_16568, Orpinomyces_1293, Orpinomyces_4249, Orpinomyces_4560, Orpinomyces_6669, Orpinomyces_9603, Orpinomyces_11433, Orpinomyces_15926, Orpinomyces_16582, Orpinomyces_3134, Orpinomyces_15058, Orpinomyces_11276, Orpinomyces_16467, Orpinomyces_16478, Orpinomyces_16587, Orpinomyces_16604, Orpinomyces_1261, Orpinomyces_5676, Orpinomyces_15232, Orpinomyces_16425, Orpinomyces_16504, Orpinomyces_259, Orpinomyces_16439, Orpinomyces_16446, Orpinomyces_16516, Orpinomyces_16631 |
|                                                    |              |      |    |                                                                                                                                                                                                                                                                                                                                                                                                                                                                                                                                                                                                                                                                                                                    |
| Hemicellulose                                      |              |      |    |                                                                                                                                                                                                                                                                                                                                                                                                                                                                                                                                                                                                                                                                                                                    |
| Xylans<br>(arabinoglucoronoxylan and arabinoxylan) | Endoxylanase | GH10 | 30 | Orpinomyces_938, Orpinomyces_16894, Orpinomyces_16911, Orpinomyces_7686, Orpinomyces_16861, Orpinomyces_5763, Orpinomyces_5899, Orpinomyces_6742, Orpinomyces_5723, Orpinomyces_7494, Orpinomyces_16860, Orpinomyces_16687, Orpinomyces_1160, Orpinomyces_1983, Orpinomyces_6679, Orpinomyces_16690, Orpinomyces_16857, Orpinomyces_11830, Orpinomyces_16698, Orpinomyces_808, Orpinomyces_16432, Orpinomyces_16766, Orpinomyces_16669, Orpinomyces_16413, Orpinomyces_2071, Orpinomyces_13743, Orpinomyces_16527, Orpinomyces_14446, Orpinomyces_16474, Orpinomyces_9123                                                                                                                                          |

|                             |                   |    |                                                                                                                                                                                                                                                                                                                                                                                                                                                                                                                                                                                                                                                                                                                                                                                                                                                                                           |
|-----------------------------|-------------------|----|-------------------------------------------------------------------------------------------------------------------------------------------------------------------------------------------------------------------------------------------------------------------------------------------------------------------------------------------------------------------------------------------------------------------------------------------------------------------------------------------------------------------------------------------------------------------------------------------------------------------------------------------------------------------------------------------------------------------------------------------------------------------------------------------------------------------------------------------------------------------------------------------|
|                             | GH11              | 46 | Orpinomyces_16909, Orpinomyces_16919, Orpinomyces_16926, Orpinomyces_16927, Orpinomyces_16928, Orpinomyces_16937, Orpinomyces_16938, Orpinomyces_16866, Orpinomyces_16874, Orpinomyces_4868, Orpinomyces_6955, Orpinomyces_16755, Orpinomyces_16793, Orpinomyces_1220, Orpinomyces_1396, Orpinomyces_10724, Orpinomyces_16651, Orpinomyces_16510, Orpinomyces_7134, Orpinomyces_16520, Orpinomyces_16423, Orpinomyces_16454, Orpinomyces_16458, Orpinomyces_16525, Orpinomyces_16526, Orpinomyces_16531, Orpinomyces_16563, Orpinomyces_16564, Orpinomyces_16572, Orpinomyces_16574, Orpinomyces_16625, Orpinomyces_1946, Orpinomyces_2012, Orpinomyces_2909, Orpinomyces_3040, Orpinomyces_3043, Orpinomyces_4849, Orpinomyces_5426, Orpinomyces_5512, Orpinomyces_5933, Orpinomyces_7606, Orpinomyces_11518, Orpinomyces_13274, Orpinomyces_13040, Orpinomyces_15347, Orpinomyces_16518 |
| beta-xylosidase             | GH43 <sup>a</sup> | 8  | Orpinomyces_843, Orpinomyces_16579, Orpinomyces_16597, Orpinomyces_16617, Orpinomyces_16620, Orpinomyces_13906, Orpinomyces_13498, Orpinomyces_15144                                                                                                                                                                                                                                                                                                                                                                                                                                                                                                                                                                                                                                                                                                                                      |
|                             | GH39              | 4  | Orpinomyces_16769, Orpinomyces_16452, Orpinomyces_16509, Orpinomyces_2939                                                                                                                                                                                                                                                                                                                                                                                                                                                                                                                                                                                                                                                                                                                                                                                                                 |
| Alpha-glucuronidase         | GH67              | 2  | Orpinomyces_16601, Orpinomyces_16632                                                                                                                                                                                                                                                                                                                                                                                                                                                                                                                                                                                                                                                                                                                                                                                                                                                      |
| Alpha-N-arabinofuranosidase | GH43 <sup>a</sup> | 16 | Orpinomyces_16799, Orpinomyces_16828, Orpinomyces_1088, Orpinomyces_3146, Orpinomyces_8634, Orpinomyces_16512, Orpinomyces_16579, Orpinomyces_16597, Orpinomyces_16617, Orpinomyces_16620, Orpinomyces_16449, Orpinomyces_16570, Orpinomyces_16879, Orpinomyces_2841, Orpinomyces_3639, Orpinomyces_4292                                                                                                                                                                                                                                                                                                                                                                                                                                                                                                                                                                                  |

|                          |                                          |                   |    |                                                                                                                                                                                                                                                                                                                                                                                                                                                                                                                                             |
|--------------------------|------------------------------------------|-------------------|----|---------------------------------------------------------------------------------------------------------------------------------------------------------------------------------------------------------------------------------------------------------------------------------------------------------------------------------------------------------------------------------------------------------------------------------------------------------------------------------------------------------------------------------------------|
|                          | Acetyl Xylan esterase                    | NA                | 26 | Orpinomyces_2818, Orpinomyces_16853, Orpinomyces_8585, Orpinomyces_5186, Orpinomyces_973, Orpinomyces_4446, Orpinomyces_8334, Orpinomyces_9840, Orpinomyces_16910, Orpinomyces_2595, Orpinomyces_2, Orpinomyces_4, Orpinomyces_8, Orpinomyces_41, Orpinomyces_55, Orpinomyces_5186, Orpinomyces_8585, Orpinomyces_11850, Orpinomyces_9840, Orpinomyces_58, Orpinomyces_8334, Orpinomyces_14968, Orpinomyces_14969, Orpinomyces_8054, Orpinomyces_8172, Orpinomyces_11975, Orpinomyces_12793                                                 |
|                          |                                          |                   |    |                                                                                                                                                                                                                                                                                                                                                                                                                                                                                                                                             |
|                          | Polysaccharide deacetylase               | GH57 <sup>b</sup> | 4  | Orpinomyces_16501, Orpinomyces_3441, Orpinomyces_16437, Orpinomyces_16484                                                                                                                                                                                                                                                                                                                                                                                                                                                                   |
|                          |                                          | GH5 <sup>b</sup>  | 1  | Orpinomyces_3867                                                                                                                                                                                                                                                                                                                                                                                                                                                                                                                            |
|                          |                                          | GH11 <sup>b</sup> | 4  | Orpinomyces_16651, Orpinomyces_16510, Orpinomyces_7134, Orpinomyces_16520                                                                                                                                                                                                                                                                                                                                                                                                                                                                   |
|                          |                                          | Others            | 12 | Orpinomyces_14850, Orpinomyces_14663, Orpinomyces_15246, Orpinomyces_8088, Orpinomyces_10863, Orpinomyces_10749, Orpinomyces_13579, Orpinomyces_9527, Orpinomyces_13889, Orpinomyces_13095, Orpinomyces_13957, Orpinomyces_9796                                                                                                                                                                                                                                                                                                             |
|                          |                                          |                   |    |                                                                                                                                                                                                                                                                                                                                                                                                                                                                                                                                             |
|                          | Feruloyl esterase/<br>cinnamoyl esterase | NA                | 29 | Orpinomyces_7232, Orpinomyces_14286, Orpinomyces_14680, Orpinomyces_14566, Orpinomyces_14389, Orpinomyces_107, Orpinomyces_229, Orpinomyces_243, Orpinomyces_259, Orpinomyces_14286, Orpinomyces_14680, Orpinomyces_14566, Orpinomyces_14389, Orpinomyces_7232, Orpinomyces_11664, Orpinomyces_11461, Orpinomyces_476, Orpinomyces_529, Orpinomyces_569, Orpinomyces_14811, Orpinomyces_6926, Orpinomyces_7268, Orpinomyces_10141, Orpinomyces_13911, Orpinomyces_587, Orpinomyces_615, Orpinomyces_657, Orpinomyces_5469, Orpinomyces_6693 |
|                          |                                          |                   |    |                                                                                                                                                                                                                                                                                                                                                                                                                                                                                                                                             |
| Mannans/<br>glucomannans | Mannanase,<br>Mannosidase                | GH5               | 3  | Orpinomyces_11551, Orpinomyces_13832, Orpinomyces_1538                                                                                                                                                                                                                                                                                                                                                                                                                                                                                      |

|                                                          |                                             |      |    |                                                                                                                                                                                                                                                                                                                                                                                                            |
|----------------------------------------------------------|---------------------------------------------|------|----|------------------------------------------------------------------------------------------------------------------------------------------------------------------------------------------------------------------------------------------------------------------------------------------------------------------------------------------------------------------------------------------------------------|
|                                                          |                                             | GH26 | 5  | Orpinomyces_16850, Orpinomyces_16611, Orpinomyces_16411, Orpinomyces_5113, Orpinomyces_16586                                                                                                                                                                                                                                                                                                               |
|                                                          |                                             | GH2  | 3  | Orpinomyces_4367, Orpinomyces_9907, Orpinomyces_14749                                                                                                                                                                                                                                                                                                                                                      |
|                                                          |                                             |      |    |                                                                                                                                                                                                                                                                                                                                                                                                            |
| Mixed linkage beta glucan*                               | Lichenase                                   | GH16 | 9  | Orpinomyces_16490, Orpinomyces_3308, Orpinomyces_14946, Orpinomyces_5528, Orpinomyces_16436, Orpinomyces_16614, Orpinomyces_16615, Orpinomyces_16635, Orpinomyces_16636                                                                                                                                                                                                                                    |
|                                                          |                                             |      |    |                                                                                                                                                                                                                                                                                                                                                                                                            |
| <b>Anionic polysaccharides and associated side chain</b> |                                             |      |    |                                                                                                                                                                                                                                                                                                                                                                                                            |
| Galactan and Arabinogalactan                             | arabinogalactan endo-1,4-beta-galactosidase | GH53 | 2  | Orpinomyces_16670, Orpinomyces_36                                                                                                                                                                                                                                                                                                                                                                          |
|                                                          | Beta galactosidase                          | GH2  | 1  | Orpinomyces_14660                                                                                                                                                                                                                                                                                                                                                                                          |
|                                                          |                                             |      |    |                                                                                                                                                                                                                                                                                                                                                                                                            |
| Pectin                                                   | unsaturated beta-glucuronyl hydrolase       | GH88 | 1  | Orpinomyces_16433                                                                                                                                                                                                                                                                                                                                                                                          |
|                                                          |                                             |      |    |                                                                                                                                                                                                                                                                                                                                                                                                            |
|                                                          | Pectin/Pectate Lyase                        | PL1  | 21 | Orpinomyces_16403, Orpinomyces_16404, Orpinomyces_16405, Orpinomyces_16408, Orpinomyces_16410, Orpinomyces_16400, Orpinomyces_16402, Orpinomyces_143, Orpinomyces_2377, Orpinomyces_10052, Orpinomyces_10317, Orpinomyces_11041, Orpinomyces_11295, Orpinomyces_15112, Orpinomyces_16255, Orpinomyces_14551, Orpinomyces_14597, Orpinomyces_16407, Orpinomyces_16399, Orpinomyces_10086, Orpinomyces_13937 |
|                                                          |                                             | PL3  | 3  | Orpinomyces_1373, Orpinomyces_8883, Orpinomyces_12197                                                                                                                                                                                                                                                                                                                                                      |
|                                                          |                                             |      |    |                                                                                                                                                                                                                                                                                                                                                                                                            |

|                  |                          |      |    |                                                                                                                                                                                                                                                                                                                                                                                                                           |
|------------------|--------------------------|------|----|---------------------------------------------------------------------------------------------------------------------------------------------------------------------------------------------------------------------------------------------------------------------------------------------------------------------------------------------------------------------------------------------------------------------------|
| Starch           | Alpha amylase            | GH13 | 13 | Orpinomyces_675, Orpinomyces_5526, Orpinomyces_5986, Orpinomyces_16506, Orpinomyces_3479, Orpinomyces_3185, Orpinomyces_11877, Orpinomyces_16495, Orpinomyces_16441, Orpinomyces_7289, Orpinomyces_3241, Orpinomyces_16503, Orpinomyces_16426                                                                                                                                                                             |
|                  | alpha-glucosidase        | GH31 | 22 | Orpinomyces_16421, Orpinomyces_1225, Orpinomyces_9629, Orpinomyces_16178, Orpinomyces_16227, Orpinomyces_16498, Orpinomyces_15985, Orpinomyces_16431, Orpinomyces_16517, Orpinomyces_8795, Orpinomyces_9302, Orpinomyces_4334, Orpinomyces_16528, Orpinomyces_16442, Orpinomyces_13033, Orpinomyces_16537, Orpinomyces_16541, Orpinomyces_16548, Orpinomyces_3125, Orpinomyces_2368, Orpinomyces_9628, Orpinomyces_10928, |
|                  |                          | GH57 | 3  | Orpinomyces_3441, Orpinomyces_16437, Orpinomyces_16484                                                                                                                                                                                                                                                                                                                                                                    |
| Chitin           | Chitinase                | GH18 | 7  | Orpinomyces_8445, Orpinomyces_10945, Orpinomyces_16683, Orpinomyces_13782, Orpinomyces_16609, Orpinomyces_16634, Orpinomyces_16580                                                                                                                                                                                                                                                                                        |
| Peptidoglycan    | Lysozyme                 | GH25 | 1  | Orpinomyces_6304                                                                                                                                                                                                                                                                                                                                                                                                          |
| Other activities | Beta fructosidase        | GH32 | 2  | Orpinomyces_1931, Orpinomyces_16603                                                                                                                                                                                                                                                                                                                                                                                       |
|                  | Alpha Mannosidase        | GH38 | 1  | Orpinomyces_16429                                                                                                                                                                                                                                                                                                                                                                                                         |
|                  |                          | GH47 | 2  | Orpinomyces_16599, Orpinomyces_2189                                                                                                                                                                                                                                                                                                                                                                                       |
|                  | Expansin module Proteins | NA   | 8  | Orpinomyces_14816, Orpinomyces_7967, Orpinomyces_6036, Orpinomyces_12716, Orpinomyces_12826, Orpinomyces_9216, Orpinomyces_81, Orpinomyces_7911                                                                                                                                                                                                                                                                           |
|                  |                          |      |    |                                                                                                                                                                                                                                                                                                                                                                                                                           |

- a: Four annotated as having shared xylosidase, and alpha-N-arabinofuranosidase activities.
- b: Genes with dual domains, a GH domain and a Polysaccharide deacetylase domain.
- c: Although dedicated xyloglucanases were not identified, beta endogluconases could be utilized for xyloglucan degradation.
- d: Although no clear alpha xylosidases were identified, many of the GH31 alpha 1,6 glucosidases could have this activity.  
Hard to differentiate based on sequence data.

1

2

Table S21. Genes with Dockerin domains in the C1A genome.

| Model Name        | CAZY Domain | Other Non CAZY Domains                   | Predicted Function                                  | Top hit phylogeny                    |
|-------------------|-------------|------------------------------------------|-----------------------------------------------------|--------------------------------------|
| Orpinomyces_16683 | GH18        |                                          | Chitinase                                           | Metarhizium acridum<br>CQMa 102      |
| Orpinomyces_16718 | GH45        |                                          | endo-1,4- $\beta$ -D-glucanase (Cellulase)          | Syncephalastrum<br>racemosum         |
| Orpinomyces_11830 | GH10        |                                          | endo-1,4- $\beta$ -xylanase                         | Meiothermus ruber<br>DSM 1279        |
| Orpinomyces_16857 | GH10        |                                          | endo-1,4- $\beta$ -xylanase                         | Eubacterium<br>cellulosolvens 6      |
| Orpinomyces_16687 | GH10        |                                          | endo-1,4- $\beta$ -xylanase                         | Butyrivibrio<br>proteoclasticus B316 |
| Orpinomyces_16787 | GH5         |                                          | endo-1,4- $\beta$ -D-glucanase (Cellulase)          | Eubacterium siraeum<br>DSM 15702     |
| Orpinomyces_16766 | GH10        | Ricin-type beta-trefoil lectin<br>domain | endo-1,4- $\beta$ -xylanase                         | Eubacterium<br>cellulosolvens 6      |
| Orpinomyces_1160  | GH10        |                                          | endo-1,4- $\beta$ -xylanase                         | Butyrivibrio<br>proteoclasticus B316 |
| Orpinomyces_1444  | GH5         |                                          | endo-1,4- $\beta$ -D-glucanase (Cellulase)          | Eubacterium siraeum<br>V10Sc8a       |
| Orpinomyces_6679  | GH10        |                                          | endo-1,4- $\beta$ -xylanase                         | Butyrivibrio<br>proteoclasticus B316 |
| Orpinomyces_2543  | GH5         |                                          | endo-1,4- $\beta$ -D-glucanase (Cellulase)          | Eubacterium siraeum<br>DSM 15702     |
| Orpinomyces_16700 | GH5         |                                          | endo-1,4- $\beta$ -D-glucanase (Cellulase)          | Eubacterium siraeum<br>DSM 15702     |
| Orpinomyces_16860 | GH10        |                                          | endo-1,4- $\beta$ -xylanase                         | Butyrivibrio<br>proteoclasticus B316 |
| Orpinomyces_6541  | GH5         | Protein of unknown function<br>(DUF3014) | endo-1,4- $\beta$ -D-glucanase (Cellulase)          | Ralstonia syzygii R24                |
| Orpinomyces_5544  | GH6         |                                          | exo-cellobiohydrolase (non-reducing<br>end)         | Aspergillus niger                    |
| Orpinomyces_16670 | GH53        |                                          | arabinogalactanendo-1,4- $\beta$ -<br>galactosidase | Ruminococcus albus 8                 |

|                   |      |                                       |                                            |                                                  |
|-------------------|------|---------------------------------------|--------------------------------------------|--------------------------------------------------|
| Orpinomyces_16669 | GH10 | Ricin-type beta-trefoil lectin domain | endo-1,4- $\beta$ -xylanase                | Streptomyces svceus ATCC 29083                   |
| Orpinomyces_7414  | GH5  |                                       | endo-1,4- $\beta$ -D-glucanase (Cellulase) | Paenibacillus curdlanolyticus YK9                |
| Orpinomyces_524   | GH45 |                                       | endo-1,4- $\beta$ -D-glucanase (Cellulase) | Rhizopus oryzae RA 99-880                        |
| Orpinomyces_7411  | GH48 |                                       | exo-cellobiohydrolase (reducing end)       | Ktedonobacter racemifer DSM 44963                |
| Orpinomyces_16647 | GH48 |                                       | exo-cellobiohydrolase (reducing end)       | Caldicellulosiruptor sp. Tok7B.1                 |
| Orpinomyces_2345  | GH5  |                                       | endo-1,4- $\beta$ -D-glucanase (Cellulase) | Paenibacillus curdlanolyticus YK9                |
| Orpinomyces_8423  | GH6  |                                       | exo-cellobiohydrolase (non-reducing end)   | Paenibacillus mucilaginosus K02                  |
| Orpinomyces_1071  | GH5  |                                       | endo-1,4- $\beta$ -D-glucanase (Cellulase) | Ktedonobacter racemifer DSM 44963                |
| Orpinomyces_16755 | GH11 |                                       | endo-1,4- $\beta$ -xylanase                | Fibrobacter succinogenes subsp. succinogenes S85 |
| Orpinomyces_16773 | GH45 |                                       | endo-1,4- $\beta$ -D-glucanase (Cellulase) | Rhizopus oryzae RA 99-880                        |
| Orpinomyces_16793 | GH11 |                                       | endo-1,4- $\beta$ -xylanase                | Fibrobacter succinogenes subsp. succinogenes S85 |
| Orpinomyces_16779 | GH48 |                                       | exo-cellobiohydrolase (reducing end)       | Catenulispora acidiphila DSM 44928               |
| Orpinomyces_16691 | GH5  |                                       | endo-1,4- $\beta$ -D-glucanase (Cellulase) | Clostridium sp. BNL1100                          |
| Orpinomyces_204   | GH5  |                                       | endo-1,4- $\beta$ -D-glucanase (Cellulase) | Ruminococcus champanellensis 18P13               |
| Orpinomyces_1464  | GH6  |                                       | exo-cellobiohydrolase (non-reducing end)   | Paenibacillus mucilaginosus K02                  |
| Orpinomyces_2605  | GH5  |                                       | endo-1,4- $\beta$ -D-glucanase (Cellulase) | Clostridium sp. BNL1100                          |
| Orpinomyces_8266  | GH6  |                                       | exo-cellobiohydrolase (non-reducing end)   | Paenibacillus mucilaginosus K02                  |



|                   |      |                                       |                                            |                                                  |
|-------------------|------|---------------------------------------|--------------------------------------------|--------------------------------------------------|
| Orpinomyces_909   | GH5  |                                       | endo-1,4- $\beta$ -D-glucanase (Cellulase) | Ruminococcus champanellensis 18P13               |
| Orpinomyces_7034  | GH6  |                                       | exo-cellobiohydrolase (non-reducing end)   | Paenibacillus mucilaginosus K02                  |
| Orpinomyces_3449  | GH6  |                                       | exo-cellobiohydrolase (non-reducing end)   | Xanthomonas oryzae pv. oryzae MAFF 311018        |
| Orpinomyces_10724 | GH11 |                                       | endo-1,4- $\beta$ -xylanase                | Fibrobacter succinogenes subsp. succinogenes S85 |
| Orpinomyces_16651 | GH11 | Polysaccharide deacetylase            | endo-1,4- $\beta$ -xylanase                | Fibrobacter succinogenes subsp. succinogenes S85 |
| Orpinomyces_16690 | GH10 |                                       | endo-1,4- $\beta$ -xylanase                | Clostridium thermocellum DSM 2360                |
| Orpinomyces_16698 | GH10 |                                       | endo-1,4- $\beta$ -xylanase                | Saccharomonospora paurometabolica YIM 90007      |
| Orpinomyces_7615  | GH6  | Peptidase family M3                   | exo-cellobiohydrolase (non-reducing end)   | Oreochromis niloticus                            |
| Orpinomyces_16639 | GH6  |                                       | exo-cellobiohydrolase (non-reducing end)   | Paenibacillus mucilaginosus KNP414               |
| Orpinomyces_16756 | GH48 |                                       | exo-cellobiohydrolase (reducing end)       | Catenulispora acidiphila DSM 44928               |
| Orpinomyces_1396  | GH11 |                                       | endo-1,4- $\beta$ -xylanase                | Fibrobacter succinogenes subsp. succinogenes S85 |
| Orpinomyces_16799 | GH43 | Ricin-type beta-trefoil lectin domain | alpha-N-arabinofuranosidase                | Eubacterium cellulosolvens 6                     |
| Orpinomyces_16828 | GH43 | Ricin-type beta-trefoil lectin domain | alpha-N-arabinofuranosidase                | Streptomyces sviveus ATCC 29083                  |
| Orpinomyces_1088  | GH43 | Ricin-type beta-trefoil lectin domain | alpha-N-arabinofuranosidase                | Clostridium lentocellum DSM 5427                 |

|                   |      |                                                                                 |                                            |                                      |
|-------------------|------|---------------------------------------------------------------------------------|--------------------------------------------|--------------------------------------|
| Orpinomyces_3146  | GH43 | Ricin-type beta-trefoil lectin domain/Procylic acidic repetitive protein (PARP) | alpha-N-arabinofuranosidase                | Clostridium lentocellum DSM 5427     |
| Orpinomyces_16769 | GH39 | Ricin-type beta-trefoil lectin domain                                           | $\beta$ -xylosidase                        | Clostridium sp. DL-VIII              |
| Orpinomyces_16641 | GH6  |                                                                                 | exo-cellobiohydrolase (non-reducing end)   | Sorangium cellulosum 'So ce 56'      |
| Orpinomyces_16646 | GH48 |                                                                                 | exo-cellobiohydrolase (reducing end)       | Catenulispora acidiphila DSM 44928   |
| Orpinomyces_7252  | GH48 |                                                                                 | exo-cellobiohydrolase (reducing end)       | Streptosporangium roseum DSM 43021   |
| Orpinomyces_16737 | GH48 |                                                                                 | exo-cellobiohydrolase (reducing end)       | Streptomyces griseoaurantiacus M045  |
| Orpinomyces_16738 | GH48 |                                                                                 | exo-cellobiohydrolase (reducing end)       | Streptomyces griseoaurantiacus M045  |
| Orpinomyces_16770 | GH48 |                                                                                 | exo-cellobiohydrolase (reducing end)       | Catenulispora acidiphila DSM 44928   |
| Orpinomyces_4269  | GH48 |                                                                                 | exo-cellobiohydrolase (reducing end)       | Streptomyces griseoaurantiacus M045  |
| Orpinomyces_16721 | GH9  |                                                                                 | endo-1,4- $\beta$ -D-glucanase (Cellulase) | Kitasatospora setae KM-6054          |
| Orpinomyces_8446  | GH5  |                                                                                 | endo-1,4- $\beta$ -D-glucanase (Cellulase) | Clostridiaceae bacterium AN-C16-KBRB |
| Orpinomyces_11298 | GH5  | Domain of Unknown Function with PDB structure                                   | endo-1,4- $\beta$ -D-glucanase (Cellulase) | Clostridiaceae bacterium AN-C16-KBRB |
| Orpinomyces_16658 | GH45 |                                                                                 | endo-1,4- $\beta$ -D-glucanase (Cellulase) | Rhizopus oryzae RA 99-880            |
| Orpinomyces_8802  | GH6  |                                                                                 | exo-cellobiohydrolase (non-reducing end)   | Verticillium dahliae VdLs.17         |
| Orpinomyces_16732 | GH9  |                                                                                 | endo-1,4- $\beta$ -D-glucanase (Cellulase) | Kitasatospora setae KM-6054          |

|                   |      |  |                                            |                                                   |
|-------------------|------|--|--------------------------------------------|---------------------------------------------------|
| Orpinomyces_16739 | GH48 |  | exo-cellobiohydrolase (reducing end)       | Streptomyces griseoaurantiacus M045               |
| Orpinomyces_16776 | GH6  |  | exo-cellobiohydrolase (non-reducing end)   | Sorangium cellulosum 'So ce 56'                   |
| Orpinomyces_16778 | GH9  |  | endo-1,4- $\beta$ -D-glucanase (Cellulase) | Hahella chejuensis KCTC 2396                      |
| Orpinomyces_16795 | GH48 |  | exo-cellobiohydrolase (reducing end)       | Streptomyces griseoaurantiacus M045               |
| Orpinomyces_16648 | GH9  |  | endo-1,4- $\beta$ -D-glucanase (Cellulase) | Kitasatospora setae KM-6054                       |
| Orpinomyces_16653 | GH6  |  | exo-cellobiohydrolase (non-reducing end)   | Paenibacillus mucilaginosus KNP414                |
| Orpinomyces_16656 | GH6  |  | exo-cellobiohydrolase (non-reducing end)   | Sorangium cellulosum 'So ce 56'                   |
| Orpinomyces_16679 | GH48 |  | exo-cellobiohydrolase (reducing end)       | Streptomyces hygrosopicus subsp. jinggangensis 50 |
| Orpinomyces_16682 | GH48 |  | exo-cellobiohydrolase (reducing end)       | Streptomyces bingchengensis BCW-1                 |
| Orpinomyces_2490  | GH3  |  | $\beta$ -glucosidase                       | Phanerochaete chrysosporium                       |
| Orpinomyces_2901  | GH6  |  | exo-cellobiohydrolase (non-reducing end)   | Pyrenophora tritici-repentis Pt-1C-BFP            |
| Orpinomyces_3583  | GH6  |  | exo-cellobiohydrolase (non-reducing end)   | Sorangium cellulosum 'So ce 56'                   |
| Orpinomyces_4145  | GH6  |  | exo-cellobiohydrolase (non-reducing end)   | Sorangium cellulosum 'So ce 56'                   |
| Orpinomyces_4642  | GH6  |  | exo-cellobiohydrolase (non-reducing end)   | Sorangium cellulosum 'So ce 56'                   |
| Orpinomyces_4748  | GH6  |  | exo-cellobiohydrolase (non-reducing end)   | Sorangium cellulosum 'So ce 56'                   |

|                   |      |                                                                |                                            |                                                  |
|-------------------|------|----------------------------------------------------------------|--------------------------------------------|--------------------------------------------------|
| Orpinomyces_5216  | GH6  |                                                                | exo-cellobiohydrolase (non-reducing end)   | Sorangium cellulosum 'So ce 56'                  |
| Orpinomyces_10796 | GH48 |                                                                | exo-cellobiohydrolase (reducing end)       | Streptomyces bingchenggensis BCW-1               |
| Orpinomyces_11639 | GH6  |                                                                | exo-cellobiohydrolase (non-reducing end)   | Sorangium cellulosum 'So ce 56'                  |
| Orpinomyces_1220  | GH11 | Nuclear RNA-splicing-associated protein                        | endo-1,4- $\beta$ -xylanase                | Fibrobacter succinogenes subsp. succinogenes S85 |
| Orpinomyces_16850 | GH26 |                                                                | endo-1,4- $\beta$ -mannosidase             | Acetivibrio cellulolyticus CD2                   |
| Orpinomyces_7870  | GH45 |                                                                | endo-1,4- $\beta$ -D-glucanase (Cellulase) | Rhizopus oryzae RA 99-880                        |
| Orpinomyces_8084  | GH6  |                                                                | exo-cellobiohydrolase (non-reducing end)   | Sorangium cellulosum 'So ce 56'                  |
| Orpinomyces_8349  | GH48 |                                                                | exo-cellobiohydrolase (reducing end)       | Streptomyces avermitilis MA-4680                 |
| Orpinomyces_8987  | GH9  |                                                                | endo-1,4- $\beta$ -D-glucanase (Cellulase) | Kitasatospora setae KM-6054                      |
| Orpinomyces_9543  | GH9  |                                                                | endo-1,4- $\beta$ -D-glucanase (Cellulase) | Kitasatospora setae KM-6054                      |
| Orpinomyces_9720  | GH5  |                                                                | endo-1,4- $\beta$ -D-glucanase (Cellulase) | Myceliophthora thermophila ATCC 42464            |
| Orpinomyces_16432 | GH10 |                                                                | endo-1,4- $\beta$ -xylanase                | Streptomyces sviveus ATCC 29083                  |
| Orpinomyces_16477 | GH45 |                                                                | endo-1,4- $\beta$ -D-glucanase (Cellulase) | Syncephalastrum racemosum                        |
| Orpinomyces_16510 | GH11 | Polysaccharide deacetylase, DUF915, Esterase_phd, Peptidase_S9 | endo-1,4- $\beta$ -xylanase                | Fibrobacter succinogenes subsp. succinogenes S85 |
| Orpinomyces_16514 | GH5  |                                                                | endo-1,4- $\beta$ -D-glucanase (Cellulase) | Ktedonobacter racemifer DSM 44963                |

|                   |      |  |                                          |                                    |
|-------------------|------|--|------------------------------------------|------------------------------------|
| Orpinomyces_16533 | GH45 |  | endo-1,4-β-D-glucanase (Cellulase)       | Rhizopus oryzae RA 99-880          |
| Orpinomyces_16688 | GH48 |  | exo-cellobiohydrolase (reducing end)     | No hits found                      |
| Orpinomyces_16736 | GH3  |  | β-glucosidase                            | Rhizopus oryzae RA 99-880          |
| Orpinomyces_1983  | GH10 |  | endo-1,4-β-xylanase                      | Butyrivibrio proteoclasticus B316  |
| Orpinomyces_2252  | GH45 |  | endo-1,4-β-D-glucanase (Cellulase)       | No hits found                      |
| Orpinomyces_3361  | GH9  |  | endo-1,4-β-D-glucanase (Cellulase)       | Kitasatospora setae KM-6054        |
| Orpinomyces_3530  | GH6  |  | exo-cellobiohydrolase (non-reducing end) | Xylella fastidiosa EB92.1          |
| Orpinomyces_3567  | GH9  |  | endo-1,4-β-D-glucanase (Cellulase)       | Thermobifida fusca                 |
| Orpinomyces_3857  | GH6  |  | exo-cellobiohydrolase (non-reducing end) | Sorangium cellulosum 'So ce 56'    |
| Orpinomyces_5169  | GH9  |  | endo-1,4-β-D-glucanase (Cellulase)       | Cellvibrio gilvu                   |
| Orpinomyces_5811  | GH5  |  | endo-1,4-β-D-glucanase (Cellulase)       | Ruminococcus champanellensis 18P13 |
| Orpinomyces_6562  | GH45 |  | endo-1,4-β-D-glucanase (Cellulase)       | Rhizopus oryzae RA 99-880          |
| Orpinomyces_6944  | GH6  |  | exo-cellobiohydrolase (non-reducing end) | Sorangium cellulosum 'So ce 56'    |

|                   |      |                                                                                               |                                                                                    |                                                    |
|-------------------|------|-----------------------------------------------------------------------------------------------|------------------------------------------------------------------------------------|----------------------------------------------------|
| Orpinomyces_7825  | GH45 |                                                                                               | endo-1,4-β-D-glucanase (Cellulase)                                                 | No hits found                                      |
| Orpinomyces_808   | GH10 |                                                                                               | endo-1,4-β-xylanase                                                                | Saccharomonospora paurometabolica YIM 90007        |
| Orpinomyces_903   | GH6  |                                                                                               | exo-cellobiohydrolase (non-reducing end)                                           | Pyrenophora tritici-repentis Pt-1C-BFP             |
| Orpinomyces_16803 |      | Phosphatidylinositol-specific phospholipase C, X domain/Ricin-type beta-trefoil lectin domain | 1-phosphatidylinositol phosphodiesterase                                           | Bacillus thuringiensis serovar tochiensis BGSC 4Y1 |
| Orpinomyces_2818  |      | GDSL-like Lipase/Acylhydrolase                                                                | acetylxylan esterase                                                               | Trametes versicolor                                |
| Orpinomyces_16853 |      | Domain of unknown function (DUF303)                                                           | acetylxylan esterase                                                               | Cytophaga hutchinsonii ATCC 33406                  |
| Orpinomyces_8585  |      | Domain of unknown function (DUF303)/Ricin-type beta-trefoil lectin domain                     | acetylxylan esterase                                                               | Algoriphagus sp. PR1                               |
| Orpinomyces_5186  |      | Domain of unknown function (DUF303)                                                           | acetylxylan esterase                                                               | Algoriphagus sp. PR1                               |
| Orpinomyces_973   |      | Domain of unknown function (DUF303)                                                           | acetylxylan esterase                                                               | Niastella koreensis GR20-10                        |
| Orpinomyces_4446  |      | Domain of unknown function (DUF303)                                                           | acetylxylan esterase                                                               | Niastella koreensis GR20-10                        |
| Orpinomyces_8334  |      | GDSL-like Lipase/Acylhydrolase                                                                | acetylxylan esterase                                                               | Ruminococcus flavefaciens                          |
| Orpinomyces_16782 |      | Calcineurin-like phosphoesterase                                                              | conserved hypothetical protein with phosphoesterase and metallophosphatase domains | Lachnospiraceae bacterium 5 1 63FAA                |
| Orpinomyces_16836 |      | Calcineurin-like phosphoesterase                                                              | conserved hypothetical protein with phosphoesterase and metallophosphatase domains | Lachnospiraceae bacterium 5 1 63FAA                |
| Orpinomyces_3805  |      | Calcineurin-like phosphoesterase                                                              | conserved hypothetical protein with phosphoesterase and metallophosphatase domains | Lachnospiraceae bacterium 5 1 63FAA                |
| Orpinomyces_9010  |      |                                                                                               | endo-1,4-beta- glucanase/ xyloglucanase                                            | Thermobispora bispora DSM 43833                    |

|                   |     |                                                                       |                                                                           |                                   |
|-------------------|-----|-----------------------------------------------------------------------|---------------------------------------------------------------------------|-----------------------------------|
| Orpinomyces_703   |     | BNR/Asp-box repeat                                                    | cellulose-binding protein with ricin-type beta trefoil                    | Micromonospora sp. ATCC 39149     |
| Orpinomyces_14684 |     | Serpin (serine protease inhibitor)                                    | cellulosomal serpin precursor                                             | Ascaris suum                      |
| Orpinomyces_16822 |     | Serpin (serine protease inhibitor)                                    | cellulosomal serpin precursor                                             | Ascaris suum                      |
| Orpinomyces_2311  |     | Serpin (serine protease inhibitor)                                    | cellulosomal serpin precursor                                             | Branchiostoma lanceolatum         |
| Orpinomyces_15403 |     | Putative esterase/Ricin-type beta-trefoil lectin domain               | Ferulic acid esterase                                                     | Clostridium thermocellum          |
| Orpinomyces_16816 |     |                                                                       | alpha-L-arabinofuranosidase B                                             | Ruminococcus albus 7              |
| Orpinomyces_13393 |     |                                                                       | alpha-L-arabinofuranosidase B                                             | Ruminococcus albus 7              |
| Orpinomyces_16757 |     |                                                                       | alpha-L-arabinofuranosidase B                                             | Ruminococcus albus 7              |
| Orpinomyces_15655 |     |                                                                       | alpha-L-arabinofuranosidase B                                             | Ruminococcus albus 7              |
| Orpinomyces_16788 |     |                                                                       | hypothetical protein with dockerin type I repeat                          | Clostridium cellulovorans 743B    |
| Orpinomyces_16712 |     |                                                                       | hypothetical protein with dockerin type I repeat                          | Clostridium cellulovorans 743B    |
| Orpinomyces_16693 |     | Rare lipoprotein A (RlpA)-like double-psi beta-barrel                 | expansin module family protein                                            | Trichoderma atroviride IMI 206040 |
| Orpinomyces_9216  |     | Rare lipoprotein A (RlpA)-like double-psi beta-barrel/Pollen allergen | expansin module family protein                                            | Trichoderma atroviride IMI 206040 |
| Orpinomyces_7911  |     | Rare lipoprotein A (RlpA)-like double-psi beta-barrel/Pollen allergen | expansin-like protein                                                     | Trichoderma virens Gv29-8         |
| Orpinomyces_4725  |     | Rare lipoprotein A (RlpA)-like double-psi beta-barrel                 | expansin-like protein                                                     | Trichoderma virens Gv29-8         |
| Orpinomyces_14911 |     |                                                                       | Catalytic NodB homology domain of the carbohydrate esterase 4 superfamily | Metarhizium acridum CQMa 102      |
| Orpinomyces_8310  |     |                                                                       | Catalytic NodB homology domain of the carbohydrate esterase 4 superfamily | Metarhizium anisopliae ARSEF 23   |
| Orpinomyces_14389 | CEX | Alpha/beta hydrolase family/Putative esterase                         | Ferulic acid esterase                                                     | Cellulosilyticum ruminicola       |
| Orpinomyces_14566 | CEX | Alpha/beta hydrolase family/Putative esterase                         | Ferulic acid esterase                                                     | Cellulosilyticum ruminicola       |

|                    |     |                                               |                                                                                                |                                      |
|--------------------|-----|-----------------------------------------------|------------------------------------------------------------------------------------------------|--------------------------------------|
| Orpinomyces_11460  |     | Putative esterase                             | Ferulic acid esterase                                                                          | Cellulosilyticum ruminicola          |
| Orpinomyces_3084   |     | Putative esterase                             | Ferulic acid esterase                                                                          | Cellulosilyticum ruminicola          |
| Orpinomyces_437    |     | Alpha/beta hydrolase family/Putative esterase | Ferulic acid esterase                                                                          | Cellulosilyticum ruminicola          |
| Orpinomyces_14680  |     | Alpha/beta hydrolase family/Putative esterase | Ferulic acid esterase                                                                          | Cellulosilyticum ruminicola          |
| Orpinomyces_11664  |     | Alpha/beta hydrolase family/Putative esterase | Ferulic acid esterase                                                                          | Cellulosilyticum ruminicola          |
| Orpinomyces_14286  | CEX | Alpha/beta hydrolase family/Putative esterase | Ferulic acid esterase                                                                          | Cellulosilyticum ruminicola          |
| Orpinomyces_7232   | CEX | Putative esterase                             | Ferulic acid esterase                                                                          | Cellulosilyticum ruminicola          |
| Orpinomyces_16812  |     |                                               | ABC-type oligopeptide/ dipeptide transporter, substrate-binding component                      | Desulfovibrio salexigens DSM 2638    |
| ctg7180000056355.1 |     | Putative esterase                             | feruloyl esterase A, partial                                                                   | Butyrivibrio fibrisolvens 16/4       |
| Orpinomyces_6926   |     | Putative esterase                             | feruloyl esterase A, partial                                                                   | Butyrivibrio fibrisolvens 16/4       |
| Orpinomyces_10141  |     | Putative esterase                             | feruloyl esterase A, partial                                                                   | Butyrivibrio fibrisolvens 16/4       |
| Orpinomyces_9349   |     | CBM1, Mucin-like glycoprotein                 | hypothetical protein with GH61 and fungal CBM domains                                          | Arthrotrrys oligospora ATCC 24927    |
| Orpinomyces_16829  |     | WD domain, G-beta repeat                      | similar to WD repeat domain 45                                                                 | Batrachochytrium dendrobatidis JAM81 |
| Orpinomyces_16835  |     | Spc97 / Spc98 family                          | Spc97 / Spc98 family spindle pole body (SBP) components that form a complex with gamma-tubulin | Batrachochytrium dendrobatidis JAM81 |
| Orpinomyces_16123  |     |                                               | endo-1,4-beta-xylanase A                                                                       | Clostridium leptum DSM 753           |



|                   |  |                                       |                                                                                                                                                                             |                                                  |
|-------------------|--|---------------------------------------|-----------------------------------------------------------------------------------------------------------------------------------------------------------------------------|--------------------------------------------------|
| Orpinomyces_16704 |  |                                       | Peptidase associated domain: C-terminal domain of M14 N/E carboxypeptidase, Por secretion system C-terminal sorting domain, and Poly(3-hydroxybutyrate) depolymerase domain | Fibrobacter succinogenes subsp. succinogenes S85 |
| Orpinomyces_10902 |  |                                       | Peptidase associated domain: C-terminal domain of M14 N/E carboxypeptidase, Por secretion system C-terminal sorting domain, and Poly(3-hydroxybutyrate) depolymerase domain | Fibrobacter succinogenes subsp. succinogenes S85 |
| Orpinomyces_3766  |  |                                       | Peptidase associated domain: C-terminal domain of M14 N/E carboxypeptidase, Por secretion system C-terminal sorting domain, and Poly(3-hydroxybutyrate) depolymerase domain | Fibrobacter succinogenes subsp. succinogenes S85 |
| Orpinomyces_6346  |  | Ricin-type beta-trefoil lectin domain | Peptidase associated domain: C-terminal domain of M14 N/E carboxypeptidase, Por secretion system C-terminal sorting domain, and Poly(3-hydroxybutyrate) depolymerase domain | Fibrobacter succinogenes subsp. succinogenes S85 |
| Orpinomyces_11941 |  | Ricin-type beta-trefoil lectin domain | Peptidase associated domain: C-terminal domain of M14 N/E carboxypeptidase, Por secretion system C-terminal sorting domain, and Poly(3-hydroxybutyrate) depolymerase domain | Fibrobacter succinogenes subsp. succinogenes S85 |
| Orpinomyces_11115 |  | Ricin-type beta-trefoil lectin domain | Peptidase associated domain: C-terminal domain of M14 N/E carboxypeptidase, Por secretion system C-terminal sorting domain, and Poly(3-hydroxybutyrate) depolymerase domain | Fibrobacter succinogenes subsp. succinogenes S85 |
| Orpinomyces_16859 |  |                                       | hypothetical protein                                                                                                                                                        | Fibrobacter succinogenes subsp. succinogenes S85 |

|                   |  |                                                                                      |                                                                                    |                                    |
|-------------------|--|--------------------------------------------------------------------------------------|------------------------------------------------------------------------------------|------------------------------------|
| Orpinomyces_1054  |  |                                                                                      | hypothetical protein                                                               | Bacteroides eggerthii<br>1 2 48FAA |
| Orpinomyces_16637 |  | Calcineurin-like phosphoesterase                                                     | conserved hypothetical protein with phosphoesterase and metallophosphatase domains | Megamonas funiformis YIT 11815     |
| Orpinomyces_16794 |  | Calcineurin-like phosphoesterase/Calcineurin-like phosphoesterase superfamily domain | conserved hypothetical protein with phosphoesterase and metallophosphatase domains | Megamonas funiformis YIT 11815     |
| Orpinomyces_10090 |  | Calcineurin-like phosphoesterase                                                     | conserved hypothetical protein with phosphoesterase and metallophosphatase domains | Megamonas funiformis YIT 11815     |
| Orpinomyces_16837 |  | Calcineurin-like phosphoesterase                                                     | conserved hypothetical protein with phosphoesterase and metallophosphatase domains | Megamonas funiformis YIT 11815     |
| Orpinomyces_16800 |  | Calcineurin-like phosphoesterase/Calcineurin-like phosphoesterase superfamily domain | conserved hypothetical protein with phosphoesterase and metallophosphatase domains | Megamonas funiformis YIT 11815     |
| Orpinomyces_16824 |  | Domain of unknown function (DUF4353)                                                 | unknown                                                                            | Clostridium citroniae<br>WAL-17108 |
| Orpinomyces_16845 |  | Domain of unknown function (DUF4353)                                                 | unknown                                                                            | Clostridium citroniae<br>WAL-17108 |
| Orpinomyces_16815 |  | Domain of unknown function (DUF4353)                                                 | unknown                                                                            | Clostridium citroniae<br>WAL-17108 |
| Orpinomyces_16792 |  | Domain of unknown function (DUF4353)                                                 | unknown                                                                            | Clostridium citroniae<br>WAL-17108 |
| Orpinomyces_16811 |  | Protein of unknown function (DUF3184)                                                | unknown                                                                            | Phytophthora sojae                 |
| Orpinomyces_8086  |  |                                                                                      | hypothetical protein with ankyrin repeats                                          | Salpingoeca sp.<br>ATCC 50818      |
| Orpinomyces_16655 |  | CotH protein                                                                         | CotH protein                                                                       | Ruminococcus flavefaciens FD-1     |
| Orpinomyces_16677 |  | CotH protein                                                                         | CotH protein                                                                       | Ruminococcus flavefaciens FD-1     |

|                   |  |                                                       |                                                                                                                                                                 |                                       |
|-------------------|--|-------------------------------------------------------|-----------------------------------------------------------------------------------------------------------------------------------------------------------------|---------------------------------------|
| Orpinomyces_8872  |  |                                                       | lamin-tail domain (LTD), Early set domain associated with the catalytic domain of sugar utilizing enzymes at either the N or C terminus, and coH domain protein | Ruminococcus flavefaciens FD-1        |
| Orpinomyces_14805 |  |                                                       | lamin-tail domain (LTD), Early set domain associated with the catalytic domain of sugar utilizing enzymes at either the N or C terminus, and coH domain protein | Ruminococcus flavefaciens FD-1        |
| Orpinomyces_16830 |  | CotH protein                                          | lamin-tail domain (LTD), Early set domain associated with the catalytic domain of sugar utilizing enzymes at either the N or C terminus, and coH domain protein | Ruminococcus flavefaciens FD-1        |
| Orpinomyces_16796 |  | Polysaccharide deacetylase                            | Catalytic NodB homology domain of Colletotrichum lindemuthianum chitin deacetylase and similar proteins                                                         | Rhizopus oryzae RA 99-880             |
| Orpinomyces_4953  |  | Predicted AAA-ATPase                                  | AAA-ATPase_like and Protein of unknown function (DUF1703) domain                                                                                                | Roseburia inulinivorans DSM 16841     |
| Orpinomyces_16754 |  |                                                       | SGNH_hydrolase, or GDSL_hydrolase                                                                                                                               | Serpula lacrymans var. lacrymans S7.3 |
| Orpinomyces_15761 |  | Rhamnogalacturonate lyase family                      | Hypothetical protein with rhamnogalacturonan lyase domain                                                                                                       | Sorghum bicolor                       |
| Orpinomyces_5376  |  | Rare lipoprotein A (RlpA)-like double-psi beta-barrel | COG4305 Endoglucanase C-terminal domain/subunit and related proteins                                                                                            | Myxococcus xanthus DK 1622            |
| Orpinomyces_15124 |  | Leucine Rich Repeat/Leucine Rich repeats (2 copies)   | Leucine-rich repeats (LRRs), ribonuclease inhibitor (RI)-like subfamily.                                                                                        | Ectocarpus siliculosus                |
| Orpinomyces_16817 |  |                                                       | Unknown                                                                                                                                                         | No hits found                         |
| Orpinomyces_16640 |  |                                                       | Unknown                                                                                                                                                         | No hits found                         |
| Orpinomyces_1283  |  | CBM_11                                                | Unknown                                                                                                                                                         | No hits found                         |
| Orpinomyces_16760 |  |                                                       | Unknown                                                                                                                                                         | No hits found                         |
| Orpinomyces_16752 |  |                                                       | Unknown                                                                                                                                                         | No hits found                         |

|                   |  |                                                                                               |                                                                                                         |                                                  |
|-------------------|--|-----------------------------------------------------------------------------------------------|---------------------------------------------------------------------------------------------------------|--------------------------------------------------|
| Orpinomyces_16848 |  | Phosphatidylinositol-specific phospholipase C, X domain/Ricin-type beta-trefoil lectin domain | Phosphatidylinositol diacylglycerol-lyase                                                               | Yersinia frederiksenii ATCC 33641                |
| Orpinomyces_12030 |  | Cytolethal distending toxin A/C family/ PtdIns-specific phospholipase C, X domain             | phosphatidylinositol-specific phospholipase C                                                           | Sphingobacterium spiritivorum ATCC 33861         |
| Orpinomyces_14850 |  | Polysaccharide deacetylase                                                                    | Catalytic NodB homology domain of Colletotrichum lindemuthianum chitin deacetylase and similar proteins | Fibrobacter succinogenes subsp. succinogenes S85 |
| Orpinomyces_13957 |  | Polysaccharide deacetylase                                                                    | Catalytic NodB homology domain of Colletotrichum lindemuthianum chitin deacetylase and similar proteins | Aspergillus oryzae RIB40                         |
| Orpinomyces_16846 |  | Calcineurin-like phosphoesterase                                                              | Predicted phosphohydrolases of the metallophosphatase superfamily                                       | Megamonas hypermegale ART12/1                    |
| Orpinomyces_7271  |  | Calcineurin-like phosphoesterase                                                              | Predicted phosphohydrolases of the metallophosphatase superfamily                                       | Megamonas hypermegale ART12/1                    |
| Orpinomyces_3499  |  | Calcineurin-like phosphoesterase                                                              | Predicted phosphohydrolases of the metallophosphatase superfamily                                       | Megamonas hypermegale ART12/1                    |
| Orpinomyces_16751 |  | Calcineurin-like phosphoesterase                                                              | Predicted phosphohydrolases of the metallophosphatase superfamily                                       | Megamonas hypermegale ART12/1                    |
| Orpinomyces_15540 |  | Calcineurin-like phosphoesterase                                                              | Predicted phosphohydrolases of the metallophosphatase superfamily                                       | Megamonas hypermegale ART12/1                    |
| Orpinomyces_16834 |  | Calcineurin-like phosphoesterase/Calcineurin-like phosphoesterase superfamily domain          | Predicted phosphohydrolases of the metallophosphatase superfamily                                       | Megamonas hypermegale ART12/1                    |
| Orpinomyces_9959  |  | Rare lipoprotein A (RlpA)-like double-psi beta-barrel                                         | COG4305 Endoglucanase C-terminal domain/subunit and related proteins                                    | Acidovorax radicis N35                           |
| Orpinomyces_16802 |  | Ricin-type beta-trefoil lectin domain                                                         | Ferulic acid esterase                                                                                   | Schizophyllum commune H4-8                       |

|                   |  |                                                                       |                                                  |                                                           |
|-------------------|--|-----------------------------------------------------------------------|--------------------------------------------------|-----------------------------------------------------------|
| Orpinomyces_6693  |  | Alpha/beta hydrolase family/Esterase PHB depolymerase                 | Ferulic acid esterase                            | Sorangium cellulosum 'So ce 56'                           |
| Orpinomyces_5469  |  | Alpha/beta hydrolase family/Esterase PHB depolymerase                 | Poly(3-hydroxybutyrate) depolymerase             | Sorangium cellulosum 'So ce 56'                           |
| Orpinomyces_16765 |  | Alpha/beta hydrolase family/Esterase PHB depolymerase                 | Ferulic acid esterase                            | Sorangium cellulosum 'So ce 56'                           |
| Orpinomyces_16819 |  | Calcineurin-like phosphoesterase superfamily domain                   | Ser/Thr protein phosphatase family protein       | Mitsuokella multacida DSM 20544                           |
| Orpinomyces_2251  |  | Calcineurin-like phosphoesterase                                      | Ser/Thr protein phosphatase family protein       | Mitsuokella multacida DSM 20544                           |
| Orpinomyces_4698  |  | CotH protein                                                          | spore coat protein CotH                          | Ruminococcus albus 7                                      |
| Orpinomyces_5354  |  | CotH protein                                                          | spore coat protein CotH                          | Ruminococcus albus 7                                      |
| Orpinomyces_15150 |  | CotH protein                                                          | spore coat protein CotH                          | Ruminococcus albus 7                                      |
| Orpinomyces_1846  |  | CotH protein                                                          | spore coat protein CotH                          | Ruminococcus albus 7                                      |
| Orpinomyces_16748 |  | CotH protein                                                          | spore coat protein CotH                          | Ruminococcus albus 7                                      |
| Orpinomyces_16722 |  | CotH protein                                                          | spore coat protein CotH                          | Ruminococcus albus 7                                      |
| Orpinomyces_7184  |  | CotH protein                                                          | spore coat protein CotH                          | Ruminococcus albus 7                                      |
| Orpinomyces_14816 |  | Rare lipoprotein A (RlpA)-like double-psi beta-barrel                 | swollenin                                        | Hypocrea jecorina                                         |
| Orpinomyces_7967  |  |                                                                       | swollenin                                        | Hypocrea jecorina                                         |
| Orpinomyces_16844 |  | Rare lipoprotein A (RlpA)-like double-psi beta-barrel/Pollen allergen | swollenin like protein                           | Aspergillus fumigatus                                     |
| Orpinomyces_16723 |  |                                                                       | Extracellular tannase                            | Streptococcus gallolyticus subsp. gallolyticus ATCC 43143 |
| Orpinomyces_7859  |  |                                                                       | Unknown                                          | No hits found                                             |
| Orpinomyces_16841 |  |                                                                       | ubiquitin carboxyl-terminal hydrolase 5          | Coprinopsis cinerea okayama7#130                          |
| Orpinomyces_16643 |  | Rare lipoprotein A (RlpA)-like double-psi beta-barrel                 | similar to extracellular endoglucanase precursor | Corallocooccus coralloides DSM 2259                       |

Table S22. Genes with CBM domains in the C1A genome.

| Family    | Model name        | Associated Domains                                                                                                                                                                      | Predicted function                                                                       | Top hit phylogeny                                        |
|-----------|-------------------|-----------------------------------------------------------------------------------------------------------------------------------------------------------------------------------------|------------------------------------------------------------------------------------------|----------------------------------------------------------|
| Carb_bind | Orpinomyces_14946 | GH16                                                                                                                                                                                    | $\beta$ -(1,3-1,4)-glucanase (Lichenase)                                                 | Maricaulis maris MCS10                                   |
| CBM_1     | Orpinomyces_7740  | Ankyrin repeat/Ankyrin repeats (3 copies)                                                                                                                                               | ankyrin repeat protein                                                                   | Trichomonas vaginalis G3                                 |
| CBM_1     | Orpinomyces_16903 | Ankyrin repeat/Ankyrin repeats (3 copies)<br>/Protein of unknown function (DUF2002)/<br>Protein of unknown function (DUF3344)/<br>Uncharacterised protein from bacillus cereus<br>group | Comnserved hypothetical protein                                                          | Salpingoeca sp. ATCC 50818                               |
| CBM_1     | Orpinomyces_2954  | Calcineurin-like phosphoesterase<br>superfamily domain                                                                                                                                  | conserved hypothetical protein with<br>phosphoesterase and<br>metallophosphatase domains | Megamonas funiformis YIT<br>11815                        |
| CBM_1     | Orpinomyces_6741  | Dock, Ankyrin repeat/Ankyrin repeats (3<br>copies)/BRCA1 C Terminus (BRCT)<br>domain/Domain of unknown function<br>(DUF1771)/Uroporphyrinogen<br>decarboxylase (URO-D)                  | Comnserved hypothetical protein                                                          | Salpingoeca sp. ATCC 50818                               |
| CBM_1     | Orpinomyces_16893 | Domain of unknown function (DUF946)                                                                                                                                                     | Unknown                                                                                  | No hits found                                            |
| CBM_1     | Orpinomyces_16091 | GDSL-like<br>Lipase/Acylhydrolase/Rhamnogalacturonate<br>lyase family/Rhamnogalacturonase B, N-<br>terminal                                                                             | Hypothetical protein with<br>rhamnogalacturonan lyase domain                             | Opitutaceae bacterium TAV5                               |
| CBM_1     | Orpinomyces_16894 | GH10                                                                                                                                                                                    | Spore coat assembly factor SafA                                                          | Bacillus thuringiensis serovar<br>israelensis ATCC 35646 |
| CBM_1     | Orpinomyces_16911 | GH10                                                                                                                                                                                    | endo-1,4-beta-xylanase                                                                   | Butyrivibrio proteoclasticus<br>B316                     |
| CBM_1     | Orpinomyces_16861 | GH10                                                                                                                                                                                    | endo-1,4-beta-xylanase                                                                   | Meiothermus ruber DSM 1279                               |
| CBM_1     | Orpinomyces_938   | GH10                                                                                                                                                                                    | endo-1,4-beta-xylanase                                                                   | Actinomadura sp.                                         |
| CBM_1     | Orpinomyces_5763  | GH10                                                                                                                                                                                    | endo-1,4-beta-xylanase                                                                   | Meiothermus ruber DSM 1279                               |
| CBM_1     | Orpinomyces_5899  | GH10                                                                                                                                                                                    | endo-1,4-beta-xylanase                                                                   | Sreptomycetes Lividans                                   |
| CBM_1     | Orpinomyces_7494  | GH10                                                                                                                                                                                    | endo-1,4-beta-xylanase                                                                   | Verrucosispora maris AB-18-<br>032                       |
| CBM_1     | Orpinomyces_5723  | GH10                                                                                                                                                                                    | endo-1,4- $\beta$ -xylanase                                                              | Meiothermus ruber                                        |

|       |                   |                         |                                                       |                                                  |
|-------|-------------------|-------------------------|-------------------------------------------------------|--------------------------------------------------|
| CBM_1 | Orpinomyces_7686  | GH10                    | endo-1,4- $\beta$ -xylanase                           | Butyrivibrio proteoclasticus B316                |
| CBM_1 | Orpinomyces_6742  | GH10                    | endo-1,4- $\beta$ -xylanase                           | No hits found                                    |
| CBM_1 | Orpinomyces_16938 | GH11                    | endo-1,4-beta-xylanase                                | Fibrobacter succinogenes subsp. succinogenes S85 |
| CBM_1 | Orpinomyces_16909 | GH11                    | endo-1,4-beta-xylanase                                | Fibrobacter succinogenes subsp. succinogenes S85 |
| CBM_1 | Orpinomyces_16919 | GH11                    | endo-1,4-beta-xylanase                                | Fibrobacter succinogenes subsp. succinogenes S85 |
| CBM_1 | Orpinomyces_16926 | GH11                    | endo-1,4-beta-xylanase                                | Fibrobacter succinogenes subsp. succinogenes S85 |
| CBM_1 | Orpinomyces_16927 | GH11                    | endo-1,4-beta-xylanase                                | Fibrobacter succinogenes subsp. succinogenes S85 |
| CBM_1 | Orpinomyces_16928 | GH11                    | endo-1,4-beta-xylanase                                | Fibrobacter succinogenes subsp. succinogenes S85 |
| CBM_1 | Orpinomyces_16937 | GH11                    | endo-1,4-beta-xylanase                                | Fibrobacter succinogenes subsp. succinogenes S85 |
| CBM_1 | Orpinomyces_16866 | GH11                    | endo-1,4-beta-xylanase                                | Fibrobacter succinogenes subsp. succinogenes S85 |
| CBM_1 | Orpinomyces_4868  | GH11                    | endo-1,4-beta-xylanase                                | Fibrobacter succinogenes subsp. succinogenes S85 |
| CBM_1 | Orpinomyces_6955  | GH11                    | endo-1,4-beta-xylanase                                | Fibrobacter succinogenes subsp. succinogenes S85 |
| CBM_1 | Orpinomyces_16874 | GH11                    | endo-1,4-beta-xylanase                                | Fibrobacter succinogenes subsp. succinogenes S85 |
| CBM_1 | Orpinomyces_9349  | Mucin-like glycoprotein | hypothetical protein with GH61 and fungal CBM domains | Arthrotrrys oligospora ATCC 24927                |
| CBM_1 | Orpinomyces_9630  | Pectinesterase          | similar to pectinesterase family protein              | Arabidopsis lyrata subsp. lyrata                 |
| CBM_1 | Orpinomyces_7161  | Pectinesterase          | similar to pectinesterase family protein              | Arthrotrrys oligospora ATCC 24927                |
| CBM_1 | Orpinomyces_14559 | Pectinesterase          | similar to pectinesterase family protein              | Arthrotrrys oligospora ATCC 24927                |
| CBM_1 | Orpinomyces_6177  | Pectinesterase          | COG4677 Pectin methylesterase                         | Paenibacillus mucilaginosus K02                  |

|       |                   |                                          |                                                           |                                     |
|-------|-------------------|------------------------------------------|-----------------------------------------------------------|-------------------------------------|
| CBM_1 | Orpinomyces_2350  | Pectinesterase                           | Pectinesterase-2 precursor                                | Ricinus communis                    |
| CBM_1 | Orpinomyces_14597 | PL1                                      | Pectate lyase                                             | Streptomyces sp. SirexAA-E          |
| CBM_1 | Orpinomyces_16404 | PL1                                      | Pectate lyase/Amb allergen [Streptomyces sp. SirexAA-E]   | Streptomyces sp. SirexAA-E          |
| CBM_1 | Orpinomyces_16407 | PL1                                      | Pectate lyase                                             | Neosartorya fischeri NRRL 181       |
| CBM_1 | Orpinomyces_16410 | PL1                                      | Pectate lyase                                             | Streptomyces sp. SirexAA-E          |
| CBM_1 | Orpinomyces_16405 | PL1                                      | Pectate lyase                                             | Neosartorya fischeri NRRL 181       |
| CBM_1 | Orpinomyces_16403 | PL1                                      | Pectate lyase                                             | Streptomyces bingchenggensis BCW-1  |
| CBM_1 | Orpinomyces_16408 | PL1                                      | Pectate lyase                                             | Streptomyces sp SirexAA-E           |
| CBM_1 | Orpinomyces_11788 | Polysaccharide deacetylase               | carbohydrate deacetylase                                  | Coprinopsis cinerea okayama7#130    |
| CBM_1 | Orpinomyces_13624 | Polysaccharide deacetylase               | carbohydrate deacetylase                                  | Coprinopsis cinerea okayama7#130    |
| CBM_1 | Orpinomyces_13629 | Polysaccharide deacetylase               | carbohydrate deacetylase                                  | Coprinopsis cinerea okayama7#130    |
| CBM_1 | Orpinomyces_16896 | Polysaccharide deacetylase               | hypothetical protein                                      | Tuber melanosporum Mel28            |
| CBM_1 | Orpinomyces_16899 | Rhamnogalacturonate lyase family domain  | Unknown                                                   | No hits found                       |
| CBM_1 | Orpinomyces_15651 | Rhamnogalacturonate lyase family domain  | Hypothetical protein with rhamnogalacturonan lyase domain | Opiritaceae bacterium TAV5          |
| CBM_1 | Orpinomyces_16883 | Uncharacterised protein family (UPF0203) | Unknown                                                   | No hits found                       |
| CBM_1 | Orpinomyces_16930 |                                          | similar to pectinesterase family protein                  | Arthrotrichum oligospora ATCC 24927 |
| CBM_1 | Orpinomyces_15421 |                                          | similar to pectinesterase family protein                  | Arthrotrichum oligospora ATCC 24927 |
| CBM_1 | Orpinomyces_2377  |                                          | Pectate lyase                                             | Aspergillus nidulans FGSC A4        |
| CBM_1 | Orpinomyces_10086 |                                          | similar to pectate lyase C                                | Aspergillus terreus NIH2624         |
| CBM_1 | Orpinomyces_13692 |                                          | similar to endoglucanase C                                | Aspergillus terreus NIH2624         |
| CBM_1 | Orpinomyces_13937 |                                          | similar to pectate lyase C                                | Aspergillus terreus NIH2624         |
| CBM_1 | Orpinomyces_13664 |                                          | similar to endoglucanase C                                | Aspergillus terreus NIH2624         |



|       |                   |  |                                                                                                                                                                             |                                                  |
|-------|-------------------|--|-----------------------------------------------------------------------------------------------------------------------------------------------------------------------------|--------------------------------------------------|
| CBM_1 | Orpinomyces_3267  |  | Hevein or type 1 chitin binding domain (ChtBD1), Catalytic NodB homology domain of Colletotrichum lindemuthianum chitin deacetylase and similar proteins                    | Batrachochytrium dendrobatidis JAM81             |
| CBM_1 | Orpinomyces_16944 |  | hypothetical protein                                                                                                                                                        | butyrate-producing bacterium SS3/4               |
| CBM_1 | Orpinomyces_9071  |  | Rhamnogalacturan_acetylerase_like subgroup of SGNH-hydrolases                                                                                                               | Clostridium cellulovorans 743B                   |
| CBM_1 | Orpinomyces_2217  |  | RNA-binding post-transcriptional regulator cip2; Regulates global gene expression after oxidative stress.                                                                   | Coprinopsis cinerea okayama7#130                 |
| CBM_1 | Orpinomyces_2595  |  | acetylxylan esterase precursor                                                                                                                                              | Dekkera bruxellensis AWRI1499                    |
| CBM_1 | Orpinomyces_16933 |  | Peptidase associated domain: C-terminal domain of M14 N/E carboxypeptidase, Por secretion system C-terminal sorting domain, and Poly(3-hydroxybutyrate) depolymerase domain | Fibrobacter succinogenes subsp. succinogenes S85 |
| CBM_1 | Orpinomyces_2129  |  | N/A                                                                                                                                                                         | N/A                                              |
| CBM_1 | Orpinomyces_5927  |  | N/A                                                                                                                                                                         | N/A                                              |
| CBM_1 | Orpinomyces_12188 |  | N/A                                                                                                                                                                         | N/A                                              |
| CBM_1 | Orpinomyces_15704 |  | N/A                                                                                                                                                                         | N/A                                              |
| CBM_1 | Orpinomyces_16910 |  | acetylxylan esterase                                                                                                                                                        | Zobellia galactanivorans                         |
| CBM_1 | Orpinomyces_9840  |  | acetylxylan esterase                                                                                                                                                        | Bacteroides plebeius DSM 17135                   |
| CBM_1 | Orpinomyces_16935 |  | Unknown                                                                                                                                                                     | No hits found                                    |
| CBM_1 | Orpinomyces_16869 |  | Unknown                                                                                                                                                                     | No hits found                                    |
| CBM_1 | Orpinomyces_16876 |  | Unknown                                                                                                                                                                     | No hits found                                    |
| CBM_1 | Orpinomyces_143   |  | Unknown                                                                                                                                                                     | No hits found                                    |
| CBM_1 | Orpinomyces_295   |  | Unknown                                                                                                                                                                     | No hits found                                    |
| CBM_1 | Orpinomyces_831   |  | Unknown                                                                                                                                                                     | No hits found                                    |

|        |                   |                                                                     |                                                                                                                                 |                                   |
|--------|-------------------|---------------------------------------------------------------------|---------------------------------------------------------------------------------------------------------------------------------|-----------------------------------|
| CBM_1  | Orpinomyces_12180 |                                                                     | Leucine-rich repeats (LRRs), ribonuclease inhibitor (RI)-like subfamily domain, and Poly(3-hydroxybutyrate) depolymerase domain | Ostreococcus tauri                |
| CBM_1  | Orpinomyces_16907 |                                                                     | related to esterase D                                                                                                           | Piriformospora indica DSM 11827   |
| CBM_1  | Orpinomyces_16922 |                                                                     | hypothetical protein                                                                                                            | Piriformospora indica DSM 11827   |
| CBM_1  | Orpinomyces_16934 |                                                                     | hypothetical protein                                                                                                            | Piriformospora indica DSM 11827   |
| CBM_1  | Orpinomyces_16875 |                                                                     | hypothetical protein                                                                                                            | Podospora anserina S mat+         |
| CBM_1  | Orpinomyces_16881 |                                                                     | Proteophosphoglycan ppg4 includes the basic region and the leucine zipper region (bZIP) transcription factor domain             | Rhodotorula glutinis ATCC 204091  |
| CBM_1  | Orpinomyces_16880 |                                                                     | Hypothetical protein                                                                                                            | Schizosaccharomyces pombe 972h-   |
| CBM_11 | Orpinomyces_16917 | Minor capsid protein from bacteriophage/Phage T7 tail fibre protein | Unknown                                                                                                                         | No hits found                     |
| CBM_11 | Orpinomyces_1283  |                                                                     | Unknown                                                                                                                         | No hits found                     |
| CBM_18 | Orpinomyces_8445  | GH18                                                                | Chitinase, Metarhizium acridum CQMa 102                                                                                         | Paenibacillus elgii B69           |
| CBM_18 | Orpinomyces_10945 | GH18                                                                | Chitinase                                                                                                                       | Grosmanina clavigera kw1407       |
| CBM_21 | Orpinomyces_16912 |                                                                     | Protein phosphatase 2C                                                                                                          | Apis mellifera                    |
| CBM_21 | Orpinomyces_9610  |                                                                     | Putative phosphatase regulatory subunit thought to be involved in the regulation of glycogen metabolism                         | Aspergillus terreus NIH2624       |
| CBM_21 | Orpinomyces_16932 |                                                                     | protein phosphatase regulator                                                                                                   | Coprinopsis cinerea okayama7#130  |
| CBM_21 | Orpinomyces_16885 |                                                                     | Unknown                                                                                                                         | No hits found                     |
| CBM_21 | Orpinomyces_16901 |                                                                     | Unknown                                                                                                                         | No hits found                     |
| CBM_21 | Orpinomyces_4347  |                                                                     | putative phosphatase regulatory subunit                                                                                         | Paenibacillus curdlanolyticus YK9 |

|        |                   |                                           |                                                                                                                                                      |                                                              |
|--------|-------------------|-------------------------------------------|------------------------------------------------------------------------------------------------------------------------------------------------------|--------------------------------------------------------------|
| CBM_21 | Orpinomyces_16914 |                                           | Hypothetical protein                                                                                                                                 | Plasmodium berghei strain ANKA                               |
| CBM_21 | Orpinomyces_16920 |                                           | protein phosphatase regulatory subunit Gac1, Regulatory subunit for Glc7p type-1 protein phosphatase (PP1), tethers Glc7p to Gsy2p glycogen synthase | Talaromyces stipitatus ATCC 10500                            |
| CBM_25 | Orpinomyces_10670 | Ankyrin repeat/Ankyrin repeats (3 copies) | Serine/threonine-protein phosphatase 6 regulatory ankyrin repeat subunit B-like                                                                      | Amphimedon queenslandica                                     |
| CBN_25 | Orpinomyces_5526  |                                           | $\alpha$ -Amylase                                                                                                                                    | Streptococcus gallolyticus subsp. gallolyticus ATCC BAA-2069 |
| CBM_25 | Orpinomyces_5986  | GH13                                      | $\alpha$ -Amylase                                                                                                                                    | Streptococcus gallolyticus subsp. gallolyticus TX20005       |
| CBM_25 | Orpinomyces_16890 |                                           | hypothetical protein with weak homolgy to amyE (alpha-amylase) of Bacillus subtilis 168                                                              | Bacillus subtilis subsp. natto BEST195                       |
| CBM_25 | Orpinomyces_7742  |                                           | Hypothetical protein with CBM25 domain                                                                                                               | Halothermothrix orenii H 168                                 |
| CBM_25 | Orpinomyces_1900  |                                           | $\alpha$ -Amylase-like protein                                                                                                                       | Streptosporangium roseum DSM 43021                           |
| CBM_48 | Orpinomyces_675   | GH13                                      | 1,4-alpha-glucan-branching enzyme                                                                                                                    | Neurospora tetrasperma FGSC 2508                             |
| CBM_48 | Orpinomyces_9551  |                                           | N/A                                                                                                                                                  | N/A                                                          |
| CBM_48 | Orpinomyces_16904 |                                           | pullulanase, type I                                                                                                                                  | Paenibacillus sp. oral taxon 786 str. D14                    |

1  
2  
3  
4  
5

1 Table S23. Absolute and relative transcripts per million (TPM) of the top highly transcribed glycoside hydrolase genes in cellobiose-  
 2 and cellulose-grown cultures.

| GH family | Gene name         | Substrate | Activity                                   | Transcripts per million of cellobiose-grown cultures |              | Transcripts per million of cellulose-grown cultures |              |
|-----------|-------------------|-----------|--------------------------------------------|------------------------------------------------------|--------------|-----------------------------------------------------|--------------|
|           |                   |           |                                            | Absolute                                             | Relative (%) | Absolute                                            | Relative (%) |
| GH45      | Orpinomyces_7825  | Cellulose | endo-1,4- $\beta$ -D-glucanase (Cellulase) | 703.6                                                | 2.34         | 155                                                 | 1.57         |
| GH45      | Orpinomyces_6562  | Cellulose | endo-1,4- $\beta$ -D-glucanase (Cellulase) | 89.2                                                 | 0.30         | 62.9                                                | 0.64         |
| GH45      | Orpinomyces_524   | Cellulose | endo-1,4- $\beta$ -D-glucanase (Cellulase) | 87.7                                                 | 0.29         | 58.1                                                | 0.59         |
| GH45      | Orpinomyces_9330  | Cellulose | endo-1,4- $\beta$ -D-glucanase (Cellulase) | 87.7                                                 | 0.29         | 58.1                                                | 0.59         |
| GH45      | Orpinomyces_2252  | Cellulose | endo-1,4- $\beta$ -D-glucanase (Cellulase) | 80.2                                                 | 0.27         | 26.3                                                | 0.27         |
| GH45      | Orpinomyces_7870  | Cellulose | endo-1,4- $\beta$ -D-glucanase (Cellulase) | 108.9                                                | 0.36         | 19.7                                                | 0.20         |
| GH45      | Orpinomyces_4559  | Cellulose | endo-1,4- $\beta$ -D-glucanase (Cellulase) | 62.3                                                 | 0.21         | 0                                                   | 0            |
| GH5       | Orpinomyces_6541  | Cellulose | endo-1,4- $\beta$ -D-glucanase (Cellulase) | 12                                                   | 0.04         | 498.7                                               | 5.05         |
| GH5       | Orpinomyces_8446  | Cellulose | endo-1,4- $\beta$ -D-glucanase (Cellulase) | 35.9                                                 | 0.12         | 434.7                                               | 4.40         |
| GH5       | Orpinomyces_2345  | Cellulose | endo-1,4- $\beta$ -D-glucanase (Cellulase) | 250.1                                                | 0.83         | 418.4                                               | 4.23         |
| GH5       | Orpinomyces_1071  | Cellulose | endo-1,4- $\beta$ -D-glucanase (Cellulase) | 18.3                                                 | 0.06         | 260.8                                               | 2.64         |
| GH5       | Orpinomyces_11298 | Cellulose | endo-1,4- $\beta$ -D-glucanase (Cellulase) | 40                                                   | 0.13         | 199.3                                               | 2.02         |

|     |                   |           |                                          |       |      |       |      |
|-----|-------------------|-----------|------------------------------------------|-------|------|-------|------|
| GH5 | Orpinomyces_909   | Cellulose | endo-1,4-β-D-glucanase (Cellulase)       | 13.8  | 0.05 | 168.8 | 1.71 |
| GH5 | Orpinomyces_7414  | Cellulose | endo-1,4-β-D-glucanase (Cellulase)       | 99.6  | 0.33 | 124.8 | 1.26 |
| GH5 | Orpinomyces_1538  | Cellulose | endo-1,4-β-D-glucanase (Cellulase)       | 21.2  | 0.07 | 91.4  | 0.92 |
| GH5 | Orpinomyces_204   | Cellulose | endo-1,4-β-D-glucanase (Cellulase)       | 73    | 0.24 | 77.2  | 0.78 |
| GH5 | Orpinomyces_8093  | Cellulose | endo-1,4-β-D-glucanase (Cellulase)       | 73    | 0.24 | 77.2  | 0.78 |
| GH9 | Orpinomyces_8987  | Cellulose | endo-1,4-β-D-glucanase (Cellulase)       | 295.7 | 0.98 | 305   | 3.09 |
| GH9 | Orpinomyces_3567  | Cellulose | endo-1,4-β-D-glucanase (Cellulase)       | 212.9 | 0.71 | 267.8 | 2.71 |
| GH9 | Orpinomyces_3361  | Cellulose | endo-1,4-β-D-glucanase (Cellulase)       | 103.8 | 0.34 | 136.7 | 1.38 |
| GH9 | Orpinomyces_9543  | Cellulose | endo-1,4-β-D-glucanase (Cellulase)       | 442.7 | 1.47 | 28.3  | 0.29 |
| GH6 | Orpinomyces_4145  | Cellulose | exo-cellobiohydrolase (non-reducing end) | 283.3 | 0.94 | 688.1 | 6.96 |
| GH6 | Orpinomyces_12853 | Cellulose | exo-cellobiohydrolase (non-reducing end) | 115.9 | 0.38 | 606.9 | 6.14 |
| GH6 | Orpinomyces_2459  | Cellulose | exo-cellobiohydrolase (non-reducing end) | 16.5  | 0.05 | 290.1 | 2.94 |
| GH6 | Orpinomyces_4748  | Cellulose | exo-cellobiohydrolase (non-reducing end) | 541.9 | 1.80 | 116.9 | 1.18 |
| GH6 | Orpinomyces_3449  | Cellulose | exo-cellobiohydrolase (non-reducing end) | 35    | 0.12 | 106.1 | 1.07 |
| GH6 | Orpinomyces_3530  | Cellulose | exo-cellobiohydrolase (non-reducing end) | 29.0  | 0.10 | 56    | 0.57 |
| GH6 | Orpinomyces_11639 | Cellulose | exo-cellobiohydrolase (non-reducing end) | 78.3  | 0.26 | 51.7  | 0.52 |
| GH6 | Orpinomyces_3375  | Cellulose | exo-cellobiohydrolase (non-reducing end) | 243.5 | 0.81 | 44.9  | 0.45 |
| GH6 | Orpinomyces_12896 | Cellulose | exo-cellobiohydrolase (non-reducing end) | 129.8 | 0.43 | 0     | 0    |

|      |                   |           |                                          |        |      |        |       |
|------|-------------------|-----------|------------------------------------------|--------|------|--------|-------|
| GH6  | Orpinomyces_2592  | Cellulose | exo-cellobiohydrolase (non-reducing end) | 296.1  | 0.98 | 0      | 0     |
| GH6  | Orpinomyces_8802  | Cellulose | exo-cellobiohydrolase (non-reducing end) | 136.8  | 0.45 | 0      | 0     |
| GH48 | Orpinomyces_8349  | Cellulose | exo-cellobiohydrolase (reducing end)     | 445.7  | 1.48 | 2426.4 | 24.56 |
| GH48 | Orpinomyces_9842  | Cellulose | exo-cellobiohydrolase (reducing end)     | 504.3  | 1.67 | 1561.9 | 15.81 |
| GH48 | Orpinomyces_15099 | Cellulose | exo-cellobiohydrolase (reducing end)     | 54.8   | 0.18 | 100.3  | 1.01  |
| GH48 | Orpinomyces_7252  | Cellulose | exo-cellobiohydrolase (reducing end)     | 43.1   | 0.14 | 83.2   | 0.84  |
| GH48 | Orpinomyces_7411  | Cellulose | exo-cellobiohydrolase (reducing end)     | 83.4   | 0.28 | 15.5   | 0.16  |
| GH48 | Orpinomyces_15550 | Cellulose | exo-cellobiohydrolase (reducing end)     | 110.4  | 0.37 | 0      | 0     |
| GH48 | Orpinomyces_8396  | Cellulose | exo-cellobiohydrolase (reducing end)     | 220.2  | 0.73 | 0      | 0     |
| GH1  | Orpinomyces_14808 | Cellulose | $\beta$ -glucosidase                     | 1234.5 | 4.10 | 783.4  | 7.93  |
| GH1  | Orpinomyces_1810  | Cellulose | $\beta$ -glucosidase                     | 870.2  | 2.89 | 402.1  | 4.07  |
| GH1  | Orpinomyces_1791  | Cellulose | $\beta$ -glucosidase                     | 590.4  | 1.96 | 167.2  | 1.69  |
| GH1  | Orpinomyces_8060  | Cellulose | $\beta$ -glucosidase                     | 438.9  | 1.46 | 120.2  | 1.22  |
| GH1  | Orpinomyces_14840 | Cellulose | $\beta$ -glucosidase                     | 384.1  | 1.27 | 0      | 0     |
| GH3  | Orpinomyces_4560  | Cellulose | $\beta$ -glucosidase                     | 329.4  | 1.09 | 298.2  | 3.02  |
| GH3  | Orpinomyces_2490  | Cellulose | $\beta$ -glucosidase                     | 252    | 0.84 | 250.4  | 2.53  |
| GH3  | Orpinomyces_15232 | Cellulose | $\beta$ -glucosidase                     | 28.9   | 0.10 | 147.3  | 1.49  |
| GH3  | Orpinomyces_15926 | Cellulose | $\beta$ -glucosidase                     | 131.8  | 0.44 | 118.3  | 1.20  |

|      |                   |               |                                          |        |      |        |       |
|------|-------------------|---------------|------------------------------------------|--------|------|--------|-------|
| GH3  | Orpinomyces_11433 | Cellulose     | $\beta$ -glucosidase                     | 109.5  | 0.36 | 8.6    | 0.09  |
| GH3  | Orpinomyces_6669  | Cellulose     | $\beta$ -glucosidase                     | 55.8   | 0.19 | 5      | 0.05  |
| GH10 | Orpinomyces_11830 | Hemicellulose | endo-1,4- $\beta$ -xylanase              | 77.5   | 0.26 | 268.3  | 2.72  |
| GH10 | Orpinomyces_6742  | Hemicellulose | endo-1,4- $\beta$ -xylanase              | 19.4   | 0.06 | 117.3  | 1.19  |
| GH10 | Orpinomyces_808   | Hemicellulose | endo-1,4- $\beta$ -xylanase              | 30.1   | 0.10 | 57.5   | 0.58  |
| GH10 | Orpinomyces_6679  | Hemicellulose | endo-1,4- $\beta$ -xylanase              | 6.6    | 0.02 | 53.5   | 0.54  |
| GH13 | Orpinomyces_675   | Starch        | $\alpha$ -Amylase                        | 160.7  | 0.53 | 164.9  | 1.67  |
| GH13 | Orpinomyces_5986  | Starch        | $\alpha$ -Amylase                        | 275.7  | 0.91 | 38.1   | 0.39  |
| GH13 | Orpinomyces_5526  | Starch        | $\alpha$ -Amylase                        | 207.1  | 0.69 | 24.9   | 0.25  |
| GH13 | Orpinomyces_7289  | Starch        | $\alpha$ -Amylase                        | 118.5  | 0.39 | 11.5   | 0.12  |
| GH16 | Orpinomyces_6782  | Hemicellulose | $\beta$ -(1,3-1,4)-glucanase (Lichenase) | 637.8  | 2.12 | 0      | 0     |
| GH18 | Orpinomyces_10945 | Chitin        | Chitinase                                | 283    | 0.94 | 2683.1 | 27.15 |
| GH18 | Orpinomyces_8445  | Chitin        | Chitinase                                | 319.5  | 1.06 | 549.9  | 5.57  |
| GH18 | Orpinomyces_13782 | Chitin        | Chitinase                                | 9      | 0.03 | 104.4  | 1.06  |
| GH31 | Orpinomyces_2368  | Starch        | $\alpha$ -glucosidase                    | 1134.7 | 3.77 | 152.5  | 1.54  |
| GH31 | Orpinomyces_16178 | Starch        | $\alpha$ -glucosidase                    | 542.7  | 1.80 | 71.5   | 0.72  |
| GH31 | Orpinomyces_9302  | Starch        | $\alpha$ -glucosidase                    | 784.5  | 2.60 | 36     | 0.36  |
| GH31 | Orpinomyces_9629  | Starch        | $\alpha$ -glucosidase                    | 124.5  | 0.41 | 30.6   | 0.31  |

|      |                   |               |                             |       |      |        |       |
|------|-------------------|---------------|-----------------------------|-------|------|--------|-------|
| GH31 | Orpinomyces_9628  | Starch        | $\alpha$ -glucosidase       | 219.4 | 0.73 | 28.9   | 0.29  |
| GH31 | Orpinomyces_3125  | Starch        | $\alpha$ -glucosidase       | 232.1 | 0.77 | 7.7    | 0.08  |
| GH31 | Orpinomyces_8702  | Starch        | $\alpha$ -glucosidase       | 981   | 3.26 | 0      | 0     |
| GH32 | Orpinomyces_1931  | Other         | Unknown                     | 5.7   | 0.02 | 54.8   | 0.55  |
| GH43 | Orpinomyces_13906 | Hemicellulose | $\beta$ -xylosidase         | 12    | 0.04 | 1346.3 | 13.62 |
| GH43 | Orpinomyces_2841  | Hemicellulose | alpha-N-arabinofuranosidase | 3.1   | 0.01 | 78.1   | 0.79  |
| GH43 | Orpinomyces_3639  | Hemicellulose | alpha-N-arabinofuranosidase | 11    | 0.04 | 73.1   | 0.74  |
| GH57 | Orpinomyces_3441  | Starch        | $\alpha$ -glucosidase       | 11    | 0.04 | 55.7   | 0.56  |

1  
2  
3  
4  
5  
6  
7  
8  
9  
10



Table S24. Absolute and relative transcripts per million (TPM) of the top highly transcribed genes in cellobiose- and cellulose-grown cultures.

| Gene name         | Function                                              | Transcripts per million (TPM) |          |                 |          |
|-------------------|-------------------------------------------------------|-------------------------------|----------|-----------------|----------|
|                   |                                                       | Cellobiose-grown              |          | Cellulose-grown |          |
|                   |                                                       | Absolute                      | Relative | Absolute        | Relative |
| Orpinomyces_10123 | Eukaryotic large ribosomal protein P2                 | 3832                          | 0.13     | 14603           | 1.48     |
| Orpinomyces_10272 | Ribosomal protein L15                                 | 15029                         | 0.50     | 827             | 0.08     |
| Orpinomyces_10344 | Ribosomal protein L23                                 | 15088                         | 0.50     | 36607           | 3.70     |
| Orpinomyces_10352 | Hypothetical protein                                  | 537                           | 0.02     | 4593            | 0.46     |
| Orpinomyces_10354 | Ribosomal protein L31                                 | 10647                         | 0.35     | 4357            | 0.44     |
| Orpinomyces_10566 | Ribosomal protein P2                                  | 12010                         | 0.40     | 102             | 0.01     |
| Orpinomyces_10952 | Ribosomal protein L32                                 | 14262                         | 0.47     | 901             | 0.09     |
| Orpinomyces_11043 | Hypothetical protein                                  | 11297                         | 0.37     | 74              | 0.01     |
| Orpinomyces_1124  | Ribosomal L16_L10e                                    | 12510                         | 0.42     | 12999           | 1.32     |
| Orpinomyces_11662 | Glyceraldehyde-3-phosphate dehydrogenase              | 21275                         | 0.71     | 7348            | 0.74     |
| Orpinomyces_11762 | Ribosomal protein S6e                                 | 29100                         | 0.97     | 7958            | 0.81     |
| Orpinomyces_1204  | Sugar transporter                                     | 11759                         | 0.39     | 786             | 0.08     |
| Orpinomyces_12434 | Ribosomal protein L1                                  | 12506                         | 0.42     | 2255            | 0.23     |
| Orpinomyces_1249  | Nicotinic acetylcholine receptor, alpha2 subunit-like | 5016                          | 0.17     | 14              | 0.00     |
| Orpinomyces_12508 | Ribosomal protein S8                                  | 22505                         | 0.75     | 6659            | 0.67     |
| Orpinomyces_12818 | Ribosomal protein L7                                  | 20044                         | 0.67     | 2740            | 0.28     |
| Orpinomyces_1327  | Ribosomal protein L19e                                | 15876                         | 0.53     | 25178           | 2.55     |
| Orpinomyces_13294 | Pyruvate formate lyase                                | 4488                          | 0.15     | 2079            | 0.21     |
| Orpinomyces_13622 | Hypothetical protein                                  | 392                           | 0.01     | 7683            | 0.78     |
| Orpinomyces_14188 | Fructose-bisphosphate aldolase, class II              | 9856                          | 0.33     | 4542            | 0.46     |
| Orpinomyces_14207 | Reverse transcriptase                                 | 2325                          | 0.08     | 4282            | 0.43     |
| Orpinomyces_14466 | Ribosomal protein L3                                  | 22573                         | 0.75     | 9338            | 0.95     |
| Orpinomyces_14786 | Enolase                                               | 7530                          | 0.25     | 1938            | 0.20     |
| Orpinomyces_15581 | Malic enzyme, hydrogenosomal                          | 4148                          | 0.14     | 2270            | 0.23     |
| Orpinomyces_2376  | Ribosomal protein L41                                 | 16630                         | 0.55     | 43658           | 4.42     |

|                  |                                                           |       |      |       |      |
|------------------|-----------------------------------------------------------|-------|------|-------|------|
| Orpinomyces_2836 | Hypothetical protein                                      | 84    | 0.00 | 8730  | 0.88 |
| Orpinomyces_2942 | Hypothetical protein                                      | 2     | 0.00 | 9621  | 0.97 |
| Orpinomyces_3183 | Ribosomal protein L37ae                                   | 4205  | 0.14 | 427   | 0.04 |
| Orpinomyces_3205 | RNA-binding protein                                       | 1056  | 0.04 | 25696 | 2.60 |
| Orpinomyces_3408 | Ribosomal protein L22/L17e                                | 21318 | 0.71 | 11599 | 1.17 |
| Orpinomyces_3421 | Actin, gamma 1 propeptide-like                            | 2165  | 0.07 | 11524 | 1.17 |
| Orpinomyces_3446 | Ribosomal protein L18e/L15                                | 17944 | 0.60 | 6714  | 0.68 |
| Orpinomyces_3452 | Ribosomal protein L11                                     | 17040 | 0.57 | 4807  | 0.49 |
| Orpinomyces_3762 | Vacuolar ATP synthase 16 kDa proteolipid subunit          | 4682  | 0.16 | 1495  | 0.15 |
| Orpinomyces_3803 | Actin                                                     | 11265 | 0.37 | 10747 | 1.09 |
| Orpinomyces_3898 | G-protein complex beta subunit                            | 15292 | 0.51 | 8285  | 0.84 |
| Orpinomyces_3990 | Ribosomal protein S16                                     | 5922  | 0.20 | 480   | 0.05 |
| Orpinomyces_4054 | Ribosomal protein L24e/L24                                | 18076 | 0.60 | 14262 | 1.44 |
| Orpinomyces_4413 | Ribosomal protein rpl30                                   | 18248 | 0.61 | 4686  | 0.47 |
| Orpinomyces_4514 | Pyruvate formate lyase                                    | 829   | 0.03 | 12036 | 1.22 |
| Orpinomyces_4779 | Hypothetical protein                                      | 71    | 0.00 | 5227  | 0.53 |
| Orpinomyces_4825 | Ribosomal protein L18ae                                   | 23561 | 0.78 | 3728  | 0.38 |
| Orpinomyces_4841 | Telomere and ribosome associated protein Stm1             | 7759  | 0.26 | 14965 | 1.51 |
| Orpinomyces_4949 | Ribosomal protein L7Ae                                    | 21609 | 0.72 | 2978  | 0.30 |
| Orpinomyces_5592 | Ribosomal protein S24                                     | 6413  | 0.21 | 9327  | 0.94 |
| Orpinomyces_5667 | Ribosomal protein L2                                      | 27725 | 0.92 | 10499 | 1.06 |
| Orpinomyces_6009 | Ribosomal protein S2                                      | 27266 | 0.91 | 13454 | 1.36 |
| Orpinomyces_6091 | Sugar transporter of the major facilitator superfamily    | 21202 | 0.70 | 1782  | 0.18 |
| Orpinomyces_6251 | Ribosomal protein L34                                     | 19930 | 0.66 | 14998 | 1.52 |
| Orpinomyces_6538 | Ribosomal protein L37                                     | 16027 | 0.53 | 934   | 0.09 |
| Orpinomyces_6893 | Nascent polypeptide-associated complex alpha subunit-like | 4136  | 0.14 | 2200  | 0.22 |
| Orpinomyces_7291 | Ribosomal protein L23a-like                               | 19870 | 0.66 | 33949 | 3.44 |
| Orpinomyces_7585 | Ribosomal protein L4                                      | 13824 | 0.46 | 16158 | 1.64 |
| Orpinomyces_7694 | Pyruvate formate lyase                                    | 4644  | 0.15 | 996   | 0.10 |
| Orpinomyces_8    | Hypothetical protein                                      | 120   | 0.00 | 6566  | 0.66 |

|                  |                                          |       |      |       |      |
|------------------|------------------------------------------|-------|------|-------|------|
| Orpinomyces_8027 | Ribosomal protein S27                    | 6468  | 0.21 | 185   | 0.02 |
| Orpinomyces_8358 | Ribosomal protein S13                    | 12546 | 0.42 | 6205  | 0.63 |
| Orpinomyces_8829 | Elongation Factor 1-alpha                | 26331 | 0.87 | 7368  | 0.75 |
| Orpinomyces_8876 | Succinyl-CoA synthetase alpha subunit    | 4631  | 0.15 | 1751  | 0.18 |
| Orpinomyces_8897 | Ribosomal L16_L10e                       | 12510 | 0.42 | 12999 | 1.32 |
| Orpinomyces_8990 | Similar to MFS sugar transporter         | 7230  | 0.24 | 389   | 0.04 |
| Orpinomyces_9093 | Translationally controlled tumor protein | 9590  | 0.32 | 2179  | 0.22 |
| Orpinomyces_919  | Hypothetical protein                     | 451   | 0.01 | 4350  | 0.44 |
| Orpinomyces_9804 | Ribosomal protein L8                     | 18282 | 0.61 | 9680  | 0.98 |

1  
2  
3  
4  
5  
6  
7  
8  
9  
10  
11  
12  
13

Table S25. Summary of dry weight, cellulose, hemicellulose, xylan, lignin, and fermentable sugar losses in microcosms with different types of plant materials.

| Substrate    | Treatment | Dry weight     |                | Cellulose      |                | Hemicellulose  |                | Xylan          |                | Lignin         |                | % Dry weight loss | % FS lost |
|--------------|-----------|----------------|----------------|----------------|----------------|----------------|----------------|----------------|----------------|----------------|----------------|-------------------|-----------|
|              |           | T <sub>0</sub> | T <sub>f</sub> |                   |           |
| Switch grass | None      | 0.40 ± 0.01    | 0.32 ± 0.07    | 0.16 ± 0       | 0.11 ± 0       | 0.15 ± 0       | 0.11 ± 0.01    | 0.12 ± 0       | 0.09 ± 0.03    | 0.09 ± 0       | 0.10 ± 0.01    | 18.6              | 28.71     |
|              | Acid      | 0.48 ± 0       | 0.39 ± 0.01    | 0.27 ± 0       | 0.19 ± 0.01    | 0.06 ± 0       | 0.05 ± 0       | 0.06 ± 0       | 0.04 ± 0       | 0.15 ± 0       | 0.16 ± 0       | 20.2              | 31.25     |
|              | NaOH      | 0.44 ± 0       | 0.27 ± 0       | 0.21 ± 0       | 0.11 ± 0       | 0.15 ± 0       | 0.07 ± 0       | 0.13 ± 0       | 0.06 ± 0       | 0.08 ± 0.01    | 0.09 ± 0       | 40.82             | 53.92     |
|              | Steam     | 0.50 ± 0       | 0.32 ± 0.01    | 0.29 ± 0       | 0.13 ± 0       | 0.02 ± 0       | 0.02 ± 0       | 0.02 ± 0       | 0.01 ± 0       | 0.16 ± 0       | 0.18 ± 0.01    | 32.19             | 45.66     |
| Corn stover  | None      | 0.44 ± 0.06    | 0.26 ± 0       | 0.20 ± 0       | 0.10 ± 0       | 0.16 ± 0       | 0.10 ± 0       | 0.13 ± 0.01    | 0.06 ± 0       | 0.08 ± 0       | 0.06 ± 0       | 39.32             | 47.45     |
|              | NaOH      | 0.47 ± 0.02    | 0.18 ± 0.04    | 0.26 ± 0.01    | 0.06 ± 0       | 0.16 ± 0       | 0.04 ± 0       | 0.13 ± 0       | 0.03 ± 0       | 0.04 ± 0       | 0.04 ± 0.01    | 60.94             | 75.19     |
| Sorghum      | None      | 0.41 ± 0.01    | 0.28 ± 0.01    | 0.18 ± 0       | 0.11 ± 0       | 0.13 ± 0       | 0.09 ± 0       | 0.11 ± 0       | 0.07 ± 0       | 0.1 ± 0        | 0.07 ± 0       | 32.11             | 39.26     |
|              | NaOH      | 0.48 ± 0.02    | 0.25 ± 0.03    | 0.26 ± 0       | 0.10 ± 0.01    | 0.15 ± 0       | 0.06 ± 0       | 0.12 ± 0       | 0.04 ± 0       | 0.07 ± 0       | 0.07 ± 0.01    | 46.85             | 59.92     |
| Energy cane  | None      | 0.32 ± 0.01    | 0.24 ± 0.01    | 0.13 ± 0       | 0.08 ± 0       | 0.11 ± 0       | 0.07 ± 0       | 0.08 ± 0       | 0.06 ± 0       | 0.08 ± 0       | 0.07 ± 0.01    | 34.05             | 28.85     |
|              | NaOH      | 0.49 ± 0.01    | 0.29 ± 0.01    | 0.16 ± 0       | 0.10 ± 0.01    | 0.16 ± 0       | 0.07 ± 0       | 0.12 ± 0       | 0.05 ± 0       | 0.10 ± 0       | 0.09 ± 0.01    | 41.14             | 33.35     |
| Alfalfa      | None      | 0.33 ± 0.02    | 0.24 ± 0.01    | 0.14 ± 0       | 0.08 ± 0       | 0.10 ± 0       | 0.07 ± 0       | 0.05 ± 0       | 0.05 ± 0       | 0.08 ± 0       | 0.07 ± 0       | 27.52             | 38.85     |
|              | NaOH      | 0.47 ± 0.02    | 0.29 ± 0.01    | 0.23 ± 0       | 0.10 ± 0       | 0.13 ± 0       | 0.06 ± 0       | 0.07 ± 0       | 0.03 ± 0       | 0.11 ± 0       | 0.12 ± 0       | 37.18             | 53.39     |
| Bermuda      | None      | 0.49 ± 0.001   | 0.45 ± 0.01    | 0.11 ± 0       | 0.09 ± 0       | 0.16 ± 0       | 0.15 ± 0       | 0.09 ± 0.      | 0.08 ± 0       | 0.2 ± 0        | 0.2 ± 0        | 7.96              | 11.1      |
|              | NaOH      | 0.49 ± 0.01    | 0.37 ± 0       | 0.15 ± 0       | 0.06 ± 0       | 0.12 ± 0.01    | 0.07 ± 0       | 0.08 ± 0       | 0.03 ± 0       | 0.23 ± 0       | 0.22 ± 0       | 25.51             | 50.33     |
| Willow       | None      | 0.46 ± 0.01    | 0.45 ± 0       | 0.21 ± 0       | 0.20 ± 0       | 0.11 ± 0.01    | 0.11 ± 0       | 0.09 ± 0       | 0.09 ± 0       | 0.14 ± 0       | 0.14 ± 0.01    | 2.39              | 5.66      |
|              | NaOH      | 0.50 ± 0.01    | 0.40 ± 0.01    | 0.21 ± 0       | 0.15 ± 0       | 0.12 ± 0.01    | 0.08 ± 0       | 0.09 ± 0       | 0.05 ± 0       | 0.18 ± 0       | 0.15 ± 0       | 19.56             | 26.28     |

T<sub>0</sub>: Value at time zero.

T<sub>f</sub>: Value at time final.

FS: fermentable sugar

- 1
- 2
- 3
- 4

1 Table S26. Ratios of end products produced (grams) per gram of plant biomass  
 2 consumed by strain C1A.

| Substrate                    | Lactate (g)/plant biomass consumed (g) | Formate (g) /plant biomass consumed (g) | Acetate (g) /plant biomass consumed (g) | Ethanol (g) /plant biomass consumed (g) |
|------------------------------|----------------------------------------|-----------------------------------------|-----------------------------------------|-----------------------------------------|
| Unt. Switchgrass             | 0.187                                  | 0.491                                   | 0.506                                   | 0.053                                   |
| Acid Switchgrass             | 0.1982                                 | 0.403                                   | 0.410                                   | 0.086                                   |
| NaOH switchgrass             | 0.422                                  | 0.345                                   | 0.310                                   | 0.096                                   |
| Hydrothermolysis switchgrass | 0.344                                  | 0.349                                   | 0.293                                   | 0.087                                   |
| Unt. Alfalfa                 | 0.298                                  | 0.376                                   | 0.426                                   | 0.074                                   |
| NaOH alfalfa                 | 0.283                                  | 0.272                                   | 0.300                                   | 0.061                                   |
| Unt. Bermuda                 | 0.022                                  | 0.341                                   | 0.500                                   | 0.0454                                  |
| NaOH Bermuda                 | 0.185                                  | 0.377                                   | 0.400                                   | 0.015                                   |
| Unt. Corn Stover             | 0.477                                  | 0.273                                   | 0.284                                   | 0.063                                   |
| NaOH Corn Stover             | 0.384                                  | 0.204                                   | 0.176                                   | 0.062                                   |
| Unt. Sorghum                 | 0.404                                  | 0.316                                   | 0.353                                   | 0.066                                   |
| NaOH Sorghum                 | 0.458                                  | 0.233                                   | 0.185                                   | 0.048                                   |
| Unt. Energy Cane             | 0.447                                  | 0.494                                   | 0.576                                   | 0.082                                   |
| NaOH Energy Cane             | 0.556                                  | 0.295                                   | 0.290                                   | 0.063                                   |

3  
 4  
 5  
 6  
 7  
 8
